# Supplementary material for: Academic student satisfaction and perceived performance in the e-learning environment during the COVID-19 pandemic: Evidence across ten countries
Source: PLoS One. 2021 Oct 20;16(10):e0258807. doi: 10.1371/journal.pone.0258807 (PMC8528294; doi:10.1371/journal.pone.0258807)
Supplement: S1 Dataset — (XLSX) [file pone.0258807.s002.xlsx]

## Sheet: data
Q1	Q4	Q5	Q6	Q7	Q8	Q10b	Q10c	Q12b	Q12c	Q16a	Q16b	Q16c	Q16d	Q16e	Q18a	Q18b	Q18c	Q19a	Q19b	Q19c	Q19f	Q19h	Q19i	Q20b	Q20d	Q20e	Q20f	Q21c	Q21d	Q21f	Q21g	Q22a	Q22b	Q22d	Q22e	Q22f	Q23f	Q23g	Q23h
Romania	1	1	3	26	1	4	4	4	4	4	4	5	4	4	4	3	4	4	2	3	3	3	4	3	5	5	5	5	5	5	5	4	4	5	4	3	4	1	1
Romania	1	1	3	24	2	4	3	4	3	4	4	5	5	5	4	3	4	5	3	3	3	3	3	2	5	4	4	5	5	5	5	5	5	5	5	5	5	4	1
Romania	1	1	3	27	1	.	.	.	.	5	4	5	5	5	5	4	4	4	4	4	.	5	.	5	5	4	.	5	5	4	4	5	5	5	5	4	5	1	1
Romania	1	1	3	24	1	3	4	3	4	5	5	5	5	5	5	5	4	5	4	4	4	5	5	2	2	2	1	2	2	2	2	3	3	4	4	2	.	4	2
Romania	1	1	3	.	1	4	4	4	4	4	5	5	5	5	4	4	4	4	4	4	4	4	4	3	4	4	3	5	5	5	2	5	5	5	5	5	4	4	4
Romania	1	1	3	24	2	.	.	.	.	4	4	5	5	5	4	4	.	5	5	5	.	.	.	3	5	4	4	5	5	5	5	4	5	5	5	5	2	1	1
Romania	1	1	3	24	2	.	.	.	.	3	3	2	4	5	3	3	3	3	4	3	3	3	3	3	4	2	2	5	5	5	5	5	5	5	5	5	4	1	1
Romania	1	1	3	23	2	.	.	.	.	5	4	5	4	5	4	3	4	4	4	4	3	4	.	3	4	3	4	5	5	5	5	5	5	5	5	5	6	5	2
Romania	1	1	3	24	2	2	2	3	3	3	3	3	3	3	4	3	3	3	3	3	.	3	3	3	5	4	3	5	5	3	2	3	3	4	4	3	5	3	1
Romania	1	1	3	.	2	3	2	2	2	2	1	1	1	2	3	2	.	2	1	3	1	2	1	1	4	4	3	5	4	5	5	5	5	5	5	5	3	3	1
Romania	1	1	3	24	2	.	.	.	.	4	.	5	5	5	5	4	5	4	3	4	.	4	3	5	5	4	4	5	5	5	4	5	5	4	5	4	6	5	2
Romania	1	1	4	.	1	1	1	1	1	4	1	2	2	4	2	1	1	1	2	1	1	3	1	3	3	2	2	5	5	5	5	5	5	5	5	5	2	1	1
Romania	1	1	3	.	1	.	.	.	.	4	5	5	3	5	3	2	3	2	2	2	4	3	.	1	3	2	5	5	4	5	5	5	5	5	5	5	3	2	1
Romania	1	1	3	24	1	3	3	3	3	2	2	5	4	5	4	3	3	4	4	3	3	3	3	3	4	3	4	5	4	5	5	5	5	5	4	3	6	4	1
Romania	1	1	4	.	1	5	.	.	.	2	4	5	2	4	4	.	4	4	3	3	.	3	.	3	5	5	5	5	5	5	5	5	5	5	5	5	5	5	1
Romania	1	1	4	.	1	.	.	.	.	5	4	4	1	3	4	2	3	1	3	.	1	4	.	2	2	4	3	5	5	5	5	5	5	5	5	5	6	2	1
Romania	1	1	4	24	2	3	4	3	.	5	3	3	4	4	2	3	2	2	2	.	2	1	1	2	3	3	2	5	5	5	5	3	4	4	5	4	4	3	2
Romania	1	1	3	23	2	.	.	.	.	5	5	5	5	5	4	3	4	4	3	4	3	4	.	4	4	4	3	5	5	5	5	5	5	5	5	5	4	2	1
Romania	1	1	3	23	1	.	.	.	.	2	1	2	3	4	1	1	.	2	2	.	.	.	.	1	2	2	2	5	5	5	5	5	5	5	5	5	3	1	1
Romania	1	1	3	23	2	2	3	3	3	2	1	4	2	5	4	3	4	3	3	4	3	4	3	1	4	1	1	5	5	5	5	5	5	5	5	5	5	3	1
Romania	1	1	4	26	2	4	.	.	.	1	1	5	2	4	3	2	1	4	2	4	1	1	5	3	4	2	1	3	5	1	5	4	5	5	5	5	2	1	1
Romania	1	1	3	23	2	4	.	.	.	1	1	3	4	5	4	1	2	2	3	4	.	3	4	4	4	2	3	5	5	5	5	5	5	5	5	5	4	4	1
Romania	1	1	3	.	2	3	3	4	3	3	3	5	4	5	4	4	4	4	4	4	2	5	3	4	5	4	4	5	5	5	5	5	4	4	5	4	4	4	4
Romania	1	1	4	.	1	3	4	3	3	3	2	4	1	2	3	3	3	3	1	3	3	4	3	2	2	2	3	5	5	5	5	5	5	5	5	5	5	2	1
Romania	1	1	3	24	1	4	3	4	3	4	4	5	3	5	4	4	4	4	3	3	3	3	3	2	4	1	3	5	5	5	5	5	5	5	5	4	3	1	1
Romania	1	1	3	.	2	5	5	.	.	4	5	5	5	5	4	5	.	5	4	5	5	.	.	5	5	4	5	5	5	5	5	5	5	5	5	5	6	3	1
Romania	1	1	3	24	1	4	.	4	.	1	.	5	5	5	5	4	.	5	4	.	.	.	.	2	5	1	3	5	5	5	5	5	5	5	5	5	6	4	1
Romania	1	1	4	.	2	.	.	.	.	4	3	4	5	5	4	3	4	3	3	3	3	4	3	2	3	2	3	5	5	4	5	4	5	4	5	4	4	3	1
Romania	1	1	4	.	2	.	.	.	.	4	1	2	1	1	1	1	1	1	1	1	.	1	.	1	2	1	1	5	3	5	5	5	5	4	4	4	1	1	1
Romania	1	1	3	.	1	4	4	4	4	4	4	4	5	4	4	4	3	3	4	4	5	3	3	3	4	2	2	5	5	5	5	5	.	5	5	5	5	4	4
Romania	1	1	3	.	2	5	3	5	3	5	4	4	3	4	5	4	4	4	4	4	.	4	.	4	4	5	2	5	5	5	5	5	5	5	5	5	5	2	1
Romania	1	1	3	24	2	.	.	.	.	.	.	3	4	5	3	3	4	2	1	3	1	2	.	3	2	4	2	5	5	5	5	5	5	5	5	5	4	1	2
Romania	1	1	3	.	2	.	.	.	.	2	3	4	5	5	4	4	4	5	4	4	4	.	4	3	2	1	1	5	5	5	5	5	5	5	5	5	5	5	1
Romania	1	1	3	23	2	.	.	.	.	3	.	5	3	4	4	3	3	3	3	3	2	4	.	3	4	4	4	5	5	5	5	5	5	5	5	4	4	4	1
Romania	1	1	3	24	2	2	2	.	.	2	2	4	4	4	4	1	.	3	2	3	.	.	.	2	4	2	2	5	5	5	5	5	5	5	5	4	2	1	1
Romania	1	1	3	.	2	4	.	4	.	5	3	5	5	5	5	4	3	5	1	.	.	.	.	5	5	4	4	5	5	5	5	5	5	4	5	4	4	5	1
Romania	1	1	3	23	2	1	1	1	1	1	1	1	1	2	3	1	1	1	3	3	3	1	1	3	4	4	3	5	5	5	5	3	3	5	5	3	2	2	1
Romania	1	1	4	27	2	.	.	.	.	1	1	2	1	5	1	1	1	4	1	4	1	.	1	1	1	1	1	5	5	5	5	5	5	5	5	5	5	1	1
Romania	1	1	4	.	2	5	4	.	.	5	2	5	4	2	2	2	.	4	1	3	.	4	.	1	1	1	1	5	4	5	5	4	4	2	4	3	5	2	1
Romania	1	1	3	.	1	.	.	.	.	4	5	5	5	5	4	3	.	5	3	2	5	.	.	3	5	4	5	4	4	4	1	5	5	5	5	5	5	4	1
Romania	1	1	3	.	2	3	3	3	3	4	4	5	5	5	2	2	3	4	2	4	4	4	4	3	4	3	4	5	5	5	5	5	5	5	5	4	5	4	.
Romania	1	1	3	.	2	4	5	3	3	5	4	3	4	4	3	3	4	3	2	3	4	4	3	1	1	3	2	4	4	5	5	4	4	4	4	4	5	4	2
Romania	1	1	3	.	1	3	3	3	3	5	5	5	3	4	2	2	3	3	4	3	3	3	3	1	2	5	5	5	5	2	1	5	4	4	4	4	3	2	1
Romania	1	1	3	.	2	4	3	4	3	3	4	4	4	4	4	3	4	5	2	3	4	4	3	4	4	4	4	5	5	5	5	5	5	5	5	5	6	4	4
Romania	1	1	3	.	2	.	.	.	.	5	4	3	3	2	2	2	2	4	2	3	3	3	3	1	1	2	4	5	5	5	5	5	5	5	5	4	6	4	1
Romania	1	1	3	35	1	4	4	4	4	5	2	4	4	4	4	4	4	4	4	2	4	4	.	1	1	4	2	5	5	5	5	5	4	4	5	5	2	1	1
Romania	1	1	3	.	2	.	.	.	.	4	4	2	1	3	2	2	3	2	.	.	.	3	.	1	2	2	1	5	5	5	5	4	4	5	5	5	6	4	1
Romania	1	1	3	.	2	5	.	4	.	4	4	4	4	4	4	4	3	3	3	3	.	3	.	4	5	5	4	5	5	5	5	5	5	4	5	4	3	4	1
Romania	1	1	3	.	2	.	.	.	.	4	.	5	5	5	1	1	1	1	1	3	3	4	4	4	5	5	4	5	5	5	5	5	5	5	5	5	6	5	1
Romania	1	1	4	.	2	.	.	.	.	4	4	.	5	3	4	4	4	4	4	4	.	3	.	3	3	5	3	5	5	4	4	4	4	4	5	4	4	4	1
Romania	1	1	3	.	2	1	4	4	4	5	5	4	5	5	4	4	.	5	4	4	.	5	4	3	4	5	5	4	5	5	5	5	5	5	5	5	.	.	.
Romania	1	1	3	.	2	.	.	.	.	5	4	3	4	4	4	3	4	4	3	4	3	4	.	3	4	4	2	5	5	5	5	5	5	5	5	5	4	4	1
Romania	1	1	3	.	2	.	.	.	.	5	4	5	2	4	4	4	.	4	2	2	4	.	3	2	2	5	4	5	5	5	4	5	5	5	5	4	4	1	1
Romania	1	1	3	.	1	.	.	.	.	5	4	4	2	2	4	4	.	4	2	3	3	3	3	2	4	4	3	5	5	5	3	5	5	5	5	5	3	4	1
Romania	1	1	4	.	1	.	.	.	.	5	5	5	5	5	4	4	4	4	4	4	.	4	.	.	5	5	3	5	5	5	3	5	5	5	5	5	6	5	1
Romania	1	1	3	.	1	.	.	.	.	5	.	4	4	3	2	.	.	3	4	.	1	.	.	3	5	2	4	5	5	5	5	5	5	5	5	5	4	1	1
Romania	1	1	4	.	1	.	.	.	.	3	2	4	5	2	3	2	3	3	1	.	.	4	.	2	3	2	2	5	5	5	5	4	5	4	4	4	5	4	1
Romania	1	1	3	.	2	3	2	3	2	2	1	4	4	5	3	3	3	3	3	3	3	3	3	2	3	4	3	3	3	4	1	5	5	5	5	5	4	4	1
Romania	1	1	3	.	2	4	4	3	3	4	4	5	5	5	4	4	4	4	4	4	.	.	4	3	4	4	3	5	3	2	2	3	3	2	4	4	.	.	.
Romania	1	1	3	.	2	.	.	.	.	3	1	2	3	4	2	2	1	2	1	.	4	3	.	1	1	3	3	5	5	5	5	4	4	5	5	5	4	2	1
Romania	1	1	3	.	2	.	.	.	.	2	4	5	2	4	3	2	3	2	1	4	4	.	1	3	2	3	5	5	5	5	5	4	5	5	5	5	6	4	2
Romania	1	1	3	.	2	4	.	3	.	5	5	4	4	5	4	3	4	4	3	3	.	4	.	2	4	4	3	5	5	5	5	5	5	4	5	4	5	5	2
Romania	1	1	3	.	1	.	.	3	.	5	5	5	4	4	4	4	4	5	2	4	.	5	.	2	3	5	2	5	5	1	5	2	4	5	5	4	4	4	4
Romania	1	1	4	.	1	.	.	.	.	4	4	5	5	5	4	3	.	4	3	5	5	5	.	1	3	3	3	4	4	5	4	4	4	5	5	5	3	4	2
Romania	1	1	3	.	2	4	3	3	3	4	2	3	2	2	2	3	.	2	2	2	2	.	1	2	3	2	2	5	5	4	5	4	4	4	4	4	4	2	1
Romania	1	1	3	.	1	.	.	.	.	4	5	4	5	5	5	5	5	5	4	5	.	5	.	3	5	2	2	5	5	5	5	5	5	5	5	5	5	3	1
Romania	1	1	4	.	2	5	.	4	.	4	4	4	5	5	3	3	.	5	5	5	5	4	.	2	4	5	5	5	5	5	5	5	5	5	5	3	4	2	1
Romania	1	1	3	.	1	4	.	.	.	4	.	5	5	5	4	4	4	4	4	.	.	4	.	3	5	2	2	5	5	5	5	4	4	4	4	4	5	5	1
Romania	1	1	3	24	2	.	.	.	.	1	1	5	.	2	1	.	.	2	3	.	.	.	.	1	4	1	2	5	5	5	5	4	5	5	5	2	6	6	2
Romania	1	1	3	24	2	.	.	1	.	1	1	1	1	1	1	1	.	1	1	2	1	1	2	1	1	1	1	4	3	5	4	4	3	1	3	1	1	1	1
Romania	1	1	3	.	1	4	.	4	.	4	4	4	3	5	2	2	3	2	2	5	1	.	.	1	4	2	2	5	4	5	5	5	5	5	5	5	6	4	3
Romania	1	1	3	.	2	5	3	5	3	5	5	5	5	5	5	5	5	5	4	5	3	4	.	4	5	5	5	5	5	5	5	5	5	5	5	5	6	6	1
Romania	1	1	4	.	2	.	.	.	.	5	.	5	5	5	4	4	4	4	3	3	.	.	.	5	5	4	3	4	4	4	4	3	3	5	5	4	3	4	1
Romania	1	1	3	24	2	.	.	.	.	5	4	1	1	3	4	5	.	4	1	1	.	5	.	5	5	5	5	5	5	5	5	5	5	5	5	5	6	5	1
Romania	1	1	2	.	2	.	.	.	.	5	1	4	4	3	3	4	2	2	4	.	.	.	.	4	3	4	4	5	5	4	5	4	5	5	5	4	3	3	1
Romania	1	1	3	24	2	.	.	.	.	3	.	.	.	5	3	2	4	3	.	.	.	.	.	1	4	4	1	5	5	5	5	4	5	5	5	5	4	1	1
Romania	1	1	3	.	2	4	.	4	.	5	4	4	3	5	3	4	.	4	.	5	.	.	.	5	5	5	5	5	5	5	3	5	5	5	5	5	4	3	1
Romania	1	1	2	.	1	4	.	4	.	5	4	5	5	4	4	2	.	4	.	.	4	4	.	2	3	4	2	5	5	5	4	4	4	.	4	4	2	4	1
Romania	1	1	3	.	1	.	.	.	.	4	3	4	3	2	3	3	3	2	3	.	.	.	.	2	3	3	3	5	5	5	5	5	5	5	5	5	6	1	1
Romania	1	1	3	.	1	.	.	.	.	5	5	4	4	5	4	4	.	4	.	.	.	.	.	2	3	3	5	5	5	5	5	5	5	5	5	5	6	2	1
Romania	1	1	2	24	1	3	2	3	3	3	3	3	3	3	4	3	4	3	.	1	3	1	3	5	4	4	4	5	5	5	5	4	4	4	4	4	4	4	3
Romania	1	1	3	.	2	.	5	5	.	5	4	3	4	5	4	4	3	4	3	3	3	3	3	2	5	4	2	5	5	5	5	5	5	4	5	5	4	2	1
Romania	1	1	3	.	1	.	.	.	.	4	1	4	3	4	3	2	.	2	3	.	.	2	.	2	2	5	3	5	3	5	3	5	5	5	5	5	4	2	2
Romania	1	1	4	.	1	1	1	.	.	1	1	3	1	2	2	2	3	2	3	4	3	3	2	1	1	1	1	5	5	3	5	4	5	5	5	.	3	4	1
Romania	1	1	3	24	2	.	.	.	.	4	4	4	2	1	1	3	2	1	3	3	.	2	.	3	2	2	2	5	5	5	5	5	5	5	5	5	6	3	1
Romania	1	1	3	.	2	.	.	.	.	5	.	5	5	5	5	5	.	5	.	5	.	.	.	5	5	5	5	5	5	5	5	5	5	5	5	5	6	5	1
Romania	1	1	3	.	2	3	3	3	3	3	3	3	1	1	1	1	1	2	4	3	1	1	4	1	4	1	1	4	3	4	4	4	4	4	4	4	1	1	1
Romania	1	1	3	.	1	4	.	5	.	4	4	5	5	5	4	4	.	4	3	4	.	.	.	4	5	4	5	5	5	5	5	5	5	5	5	5	5	1	1
Romania	1	1	2	.	1	.	.	.	.	5	2	3	4	5	4	2	.	4	5	.	4	5	.	3	4	4	4	5	5	5	5	5	5	5	5	5	4	4	4
Romania	1	1	3	.	2	4	4	4	3	5	2	3	3	4	3	3	2	3	3	3	3	4	3	4	3	4	2	5	5	5	5	4	4	5	5	4	4	3	1
Romania	1	2	2	27	1	.	.	.	.	5	4	5	5	5	4	4	.	4	3	5	.	2	.	4	5	5	5	4	4	5	5	5	5	5	5	5	1	1	1
Romania	1	2	2	.	2	.	.	.	.	5	4	4	4	5	4	4	4	4	4	.	.	3	.	3	3	3	3	4	3	4	4	3	3	3	3	4	1	1	1
Romania	1	1	3	.	2	1	1	.	1	5	5	3	4	4	4	4	1	4	4	4	4	1	4	2	3	4	3	5	5	3	5	.	4	4	4	4	6	2	2
Romania	1	1	3	24	2	5	5	5	5	5	5	.	5	5	5	5	5	5	4	5	1	5	3	1	2	4	4	5	5	5	5	5	5	5	5	5	6	6	1
Romania	1	1	3	.	2	.	.	.	.	3	2	4	4	4	3	3	3	2	1	2	1	1	3	2	3	4	4	5	5	5	5	5	5	5	5	5	6	5	2
Romania	1	1	3	24	2	.	.	.	.	.	.	4	4	4	1	1	1	3	3	3	5	3	3	2	1	1	1	5	5	2	2	2	3	1	3	3	5	1	1
Romania	1	1	3	24	2	.	.	.	.	.	.	5	5	5	4	4	4	4	4	.	.	.	.	2	5	2	2	5	5	5	5	5	5	5	5	5	6	4	1
Romania	1	1	3	24	1	.	.	.	.	5	3	4	2	3	3	3	3	3	3	4	.	3	2	2	4	3	2	5	5	5	5	5	5	5	5	5	5	5	3
Romania	1	1	3	.	2	.	.	.	.	5	5	5	5	5	4	4	4	5	4	4	4	3	3	4	4	4	4	5	4	5	5	4	4	4	5	4	4	5	2
Romania	1	1	3	24	2	.	.	.	.	5	5	5	4	5	3	3	3	4	4	4	.	4	4	1	3	3	1	5	5	5	5	3	3	3	3	3	4	1	1
Romania	1	1	3	24	2	2	.	.	.	4	4	5	1	5	1	1	4	2	1	.	.	.	.	2	4	1	4	4	4	1	5	5	5	4	5	4	5	1	1
Romania	1	1	3	24	2	3	3	3	3	3	3	5	5	4	3	4	3	4	3	3	3	3	3	3	4	4	2	5	5	5	5	4	3	4	4	4	1	1	2
Romania	1	1	4	24	1	.	.	.	.	4	2	4	1	3	2	2	2	2	4	4	.	3	.	2	2	5	3	5	5	5	5	5	5	5	5	5	4	4	1
Romania	1	1	4	24	2	.	.	.	.	2	4	4	4	5	2	2	3	4	4	4	.	4	3	1	2	2	1	5	5	5	5	5	5	5	5	5	5	3	1
Romania	1	1	.	23	2	3	.	3	.	5	5	4	1	2	2	2	4	4	4	4	1	1	1	1	2	4	2	5	4	5	5	5	2	4	5	4	4	3	1
Romania	1	1	4	.	2	.	.	.	.	5	4	5	5	5	4	4	4	5	4	4	3	4	3	1	4	2	2	5	5	5	5	5	5	5	5	5	6	5	1
Romania	1	1	3	.	2	.	.	.	.	5	2	3	4	5	5	5	.	5	.	.	.	.	.	1	4	2	.	5	5	5	5	5	5	5	5	5	3	1	1
Romania	1	1	3	24	2	.	.	5	.	3	2	5	3	5	5	4	.	5	4	5	.	4	.	4	4	4	.	5	5	5	5	5	5	5	5	5	4	4	2
Romania	1	1	4	24	2	4	4	2	2	2	2	5	4	5	5	4	4	5	4	4	3	4	3	1	1	1	1	5	5	5	5	5	5	5	5	5	4	4	3
Romania	1	1	3	.	1	4	4	4	4	5	2	4	1	4	1	4	3	3	.	3	.	3	.	1	4	2	1	5	5	5	5	5	4	5	5	5	4	3	1
Romania	1	1	3	.	2	.	.	.	.	3	4	5	4	5	4	3	3	5	3	5	3	3	.	3	3	3	3	5	5	5	5	5	5	5	5	5	3	2	2
Romania	1	1	3	24	2	.	.	.	.	2	2	3	1	1	2	1	1	2	1	4	3	3	.	3	2	5	4	5	5	5	5	5	5	5	5	5	6	5	1
Romania	1	1	3	.	2	4	.	.	.	3	3	5	5	5	5	5	5	5	5	5	.	5	5	4	5	5	5	5	4	4	4	5	5	5	5	5	4	4	1
Romania	1	1	3	.	2	.	.	.	.	4	.	5	2	4	4	4	4	4	4	4	3	4	4	3	4	4	4	5	4	5	3	5	5	5	5	5	4	4	2
Romania	1	1	3	24	2	3	3	4	3	3	1	5	4	3	1	1	.	2	4	3	3	.	.	2	1	2	2	5	5	5	5	5	4	4	5	5	3	1	1
Romania	1	1	3	.	1	3	1	.	.	2	2	1	1	2	1	1	1	1	1	1	.	1	.	3	3	5	3	5	5	5	5	5	5	5	5	5	4	1	1
Romania	1	1	3	.	1	.	.	.	.	3	.	4	2	4	3	4	.	3	.	.	.	3	.	4	4	4	4	5	5	5	5	5	5	5	5	5	6	4	1
Romania	1	1	3	.	1	5	5	5	5	5	5	5	5	5	5	5	5	5	5	.	.	5	.	5	5	5	5	5	5	5	5	5	5	5	5	5	3	3	1
Romania	1	1	3	.	2	.	.	.	.	4	2	3	2	4	4	3	3	3	2	.	.	3	3	3	2	2	2	3	4	4	4	5	5	4	5	4	6	1	1
Romania	1	1	3	24	2	.	.	.	.	2	2	5	2	4	2	3	3	3	2	.	3	.	.	4	5	2	3	5	4	3	5	5	5	5	5	5	6	5	1
Romania	1	1	3	.	2	4	3	5	3	5	4	4	2	5	3	3	3	.	4	3	3	4	3	2	4	4	2	5	5	5	5	5	5	5	5	5	4	5	1
Romania	1	1	3	.	2	.	.	5	.	.	.	5	5	5	5	4	4	4	1	.	2	1	4	5	5	5	5	5	5	5	5	5	5	5	5	5	1	1	1
Romania	1	1	3	24	2	.	.	.	.	4	4	2	2	4	4	1	3	4	3	4	4	.	.	2	2	1	1	5	5	5	5	5	5	4	5	3	4	2	1
Romania	1	1	3	24	1	.	.	.	.	1	1	3	4	4	4	3	.	4	.	.	.	.	.	4	4	2	1	5	5	5	5	5	5	4	5	3	4	2	1
Romania	1	1	3	.	2	.	5	4	.	.	.	5	5	5	5	4	4	5	5	5	2	4	4	1	4	4	.	5	5	5	5	5	5	5	5	5	5	3	1
Romania	1	1	4	.	1	4	.	.	.	2	4	3	2	2	2	1	1	2	.	.	.	.	.	5	4	5	4	5	4	5	3	5	5	4	5	2	4	2	1
Romania	1	1	3	.	2	5	4	2	.	5	4	3	3	4	3	3	2	2	4	3	.	3	3	2	3	4	2	5	5	4	5	5	5	5	5	4	.	.	.
Romania	1	1	3	24	2	.	.	.	.	4	3	5	5	5	4	4	5	5	5	5	.	5	.	3	4	4	4	5	5	5	5	5	5	5	5	5	6	5	1
Romania	1	1	3	.	2	.	5	.	5	4	4	5	5	5	5	5	3	4	2	2	2	2	2	3	5	4	2	3	2	3	3	2	2	2	4	1	2	2	1
Romania	1	1	3	24	1	4	.	4	.	3	2	5	4	5	4	4	4	4	4	3	.	4	.	4	4	4	3	5	5	5	5	5	5	5	5	5	4	6	2
Romania	1	1	.	.	2	3	3	.	.	4	4	5	5	4	3	3	3	4	3	3	.	4	.	1	3	4	4	5	4	5	5	4	4	4	4	3	6	4	1
Romania	1	1	3	.	1	.	.	.	.	5	2	2	1	4	2	2	.	.	.	.	.	3	.	1	2	1	1	5	5	5	3	5	5	5	5	5	3	1	1
Romania	1	1	3	23	2	.	.	.	.	5	5	4	4	4	4	4	2	4	.	4	3	4	3	5	5	5	5	5	5	5	5	5	5	5	5	5	4	4	1
Romania	1	1	3	24	2	4	4	2	4	5	5	5	3	4	3	3	3	4	4	4	3	5	4	4	4	5	2	5	5	5	5	5	5	4	5	4	5	5	5
Romania	1	1	3	24	2	1	3	1	1	4	5	5	1	5	2	2	2	3	3	.	.	3	.	3	4	3	3	5	5	5	5	5	5	4	5	4	6	5	1
Romania	1	1	3	.	2	.	.	.	.	.	.	5	4	5	4	2	.	3	2	.	.	2	.	2	4	2	2	5	5	5	5	5	4	5	5	5	3	1	1
Romania	1	1	3	23	1	.	.	.	.	5	4	1	3	1	2	2	2	1	4	4	3	3	3	4	4	5	4	5	5	5	5	5	5	5	5	5	6	1	2
Romania	1	1	3	.	2	2	2	.	.	4	4	3	1	5	4	1	.	2	1	3	1	.	3	1	5	5	3	5	5	5	5	5	5	5	5	5	4	4	4
Romania	1	1	4	.	2	5	4	4	3	5	5	4	3	4	5	5	4	4	5	3	4	5	4	4	2	3	2	5	5	5	5	5	5	4	4	4	5	4	3
Romania	1	1	3	.	1	4	4	4	4	4	4	4	2	3	3	3	3	4	.	.	.	.	.	.	5	5	5	5	5	5	3	5	5	5	5	5	4	3	1
Romania	1	1	4	.	2	3	.	3	.	2	4	2	1	1	3	3	3	1	1	.	.	.	3	3	2	1	4	5	5	5	5	5	5	5	5	5	5	1	1
Romania	1	1	3	.	1	.	.	.	.	2	1	3	1	2	1	1	1	1	3	3	.	2	.	1	3	2	1	5	4	5	5	4	4	5	5	4	6	3	1
Romania	1	1	3	.	1	.	.	.	.	5	5	5	5	5	4	4	.	4	4	.	.	4	.	4	5	5	5	5	5	5	5	5	5	5	5	5	4	4	4
Romania	1	2	2	52	1	.	.	.	.	5	2	4	4	5	4	4	3	4	4	4	3	3	3	2	4	5	4	5	5	5	5	4	4	4	4	4	4	4	1
Romania	1	1	3	.	2	4	.	4	.	5	2	1	2	3	1	4	1	1	.	.	.	2	4	4	4	2	1	5	5	5	5	5	5	5	5	4	2	4	1
Romania	1	1	3	27	1	.	.	.	.	4	4	4	4	5	3	3	2	2	4	3	.	2	1	1	1	2	2	5	5	5	5	4	4	4	4	4	3	1	1
Romania	1	1	3	.	2	.	.	.	.	4	5	5	5	5	3	3	4	5	2	2	3	4	.	1	4	4	3	5	5	5	5	5	5	5	5	5	6	6	1
Romania	1	2	3	23	2	.	.	.	.	5	4	4	.	5	3	2	4	5	.	.	5	.	4	4	4	5	3	5	5	5	5	5	5	5	5	5	4	3	1
Romania	1	1	3	.	1	.	.	.	.	2	.	.	1	4	2	4	.	1	.	.	.	3	.	5	5	5	5	5	5	5	5	5	5	5	5	5	6	1	1
Romania	1	1	3	24	2	.	.	.	.	.	.	4	4	5	3	3	.	4	4	4	.	.	.	3	3	3	3	5	5	5	5	4	4	4	5	4	5	5	1
Romania	1	1	3	.	1	.	.	.	.	5	4	5	5	4	4	4	.	4	4	4	.	.	.	3	4	4	4	5	5	5	5	5	5	5	5	5	6	6	3
Romania	1	2	4	23	2	.	.	.	.	4	.	5	3	4	4	3	.	4	.	4	.	.	.	1	4	5	2	5	5	5	5	5	5	5	5	4	4	3	1
Romania	1	2	3	.	2	.	.	.	.	3	5	5	3	5	4	4	4	4	4	.	.	4	.	5	5	5	5	5	5	5	5	5	5	5	5	5	4	4	1
Romania	1	2	4	23	1	2	2	1	1	2	2	.	.	1	1	1	1	2	1	.	.	.	.	1	1	2	2	5	5	5	5	5	5	5	5	5	4	1	1
Romania	1	2	3	24	2	.	.	.	.	4	4	5	5	4	4	3	.	4	4	.	.	.	.	2	4	4	4	5	5	5	5	5	5	5	5	5	2	3	1
Romania	1	1	3	.	2	5	.	.	.	4	4	5	4	5	4	4	4	4	4	5	.	.	.	2	4	3	3	5	5	5	5	5	5	5	5	5	4	4	1
Romania	1	1	3	.	1	3	.	.	.	4	4	5	4	2	2	4	.	3	.	.	.	.	.	1	1	3	3	5	5	5	5	5	5	5	5	5	6	1	1
Romania	1	1	4	.	2	3	.	3	.	5	5	2	2	2	2	2	2	1	1	3	3	3	4	2	2	4	4	5	5	5	5	5	5	4	4	5	2	1	1
Romania	1	1	3	.	1	.	.	.	.	4	3	3	3	4	3	3	3	3	.	.	.	.	.	1	3	3	2	5	4	5	5	4	4	4	5	4	4	4	1
Romania	1	1	3	.	1	.	.	2	.	5	5	3	5	2	3	3	3	3	3	.	.	.	.	1	1	1	1	5	5	5	5	5	5	5	5	5	5	3	1
Romania	1	1	1	.	1	2	.	2	.	4	4	3	2	2	2	2	.	2	3	3	3	3	3	1	2	2	2	5	5	5	5	5	5	5	5	5	4	4	1
Romania	1	1	4	.	1	.	.	.	.	4	1	1	4	.	.	3	.	4	4	2	.	.	.	1	2	2	1	5	5	5	1	5	5	5	5	5	5	3	1
Romania	1	1	4	.	1	4	4	4	4	3	4	5	5	5	5	5	5	5	5	5	5	5	5	5	5	5	3	5	5	5	5	5	5	5	5	5	6	2	2
Romania	1	1	3	.	1	3	.	.	.	5	3	3	1	3	2	2	.	2	.	.	3	3	3	2	3	2	2	5	5	5	5	5	5	5	5	3	5	3	1
Romania	1	1	4	.	2	.	.	.	.	4	5	4	2	2	4	3	3	4	3	5	5	5	.	3	4	2	2	5	5	4	5	5	5	5	5	4	6	3	2
Romania	1	1	3	.	2	3	4	.	.	4	5	4	4	2	4	4	.	4	.	.	.	5	.	4	5	4	3	5	5	5	5	5	5	5	5	5	4	2	1
Romania	1	1	1	.	1	.	.	.	.	2	1	1	1	3	4	2	.	2	2	.	.	.	.	3	4	4	2	5	5	5	5	5	5	5	5	4	4	1	1
Romania	1	1	.	.	1	1	1	1	1	5	2	2	2	2	1	2	2	2	2	2	2	2	2	4	2	3	1	5	5	5	5	4	5	4	4	4	2	1	1
Romania	1	1	3	.	1	.	.	.	.	5	4	2	3	1	3	4	3	3	.	.	4	.	2	2	4	4	1	5	5	5	5	4	3	5	5	3	3	2	1
Romania	1	1	1	.	2	4	.	4	.	4	5	3	4	4	4	4	5	4	.	.	5	.	.	3	5	5	5	5	5	5	5	5	5	5	5	5	4	1	1
Romania	1	1	4	.	2	.	.	.	.	.	.	3	2	5	3	2	2	3	2	2	.	.	.	4	4	4	.	5	4	5	5	5	4	3	5	4	2	1	1
Romania	1	1	3	.	2	3	1	3	2	4	2	2	1	2	2	4	1	2	.	.	2	1	.	1	2	2	3	5	5	5	5	5	5	5	5	2	6	5	1
Romania	1	1	4	24	2	.	.	5	.	2	2	4	5	2	4	4	4	3	1	3	3	3	5	4	5	4	4	5	5	5	5	5	5	5	5	5	6	4	2
Romania	1	1	3	.	2	.	.	.	.	.	4	4	5	5	4	2	3	4	2	4	.	5	2	3	4	4	3	5	5	5	5	5	5	5	5	5	5	5	1
Romania	1	1	4	.	2	.	.	.	.	.	.	5	3	5	5	5	.	4	3	.	.	.	.	3	4	2	2	5	5	5	5	5	5	5	5	5	3	4	2
Romania	1	1	3	.	1	2	.	.	.	4	2	5	4	2	2	2	3	2	.	5	.	.	.	1	3	2	2	5	5	5	5	5	5	5	5	5	6	1	1
Romania	.	.	4	.	2	.	.	.	.	5	3	4	5	5	4	3	.	4	4	.	.	3	.	2	3	4	3	3	3	5	5	4	4	3	4	4	2	2	1
Romania	1	1	3	.	2	.	.	.	.	5	5	5	5	5	4	4	4	4	4	4	4	3	.	2	5	5	2	5	5	5	5	5	5	5	5	5	5	1	1
Romania	1	1	3	.	2	.	.	.	.	5	3	3	4	4	4	4	.	4	4	4	.	.	.	3	4	3	3	5	5	5	5	5	5	5	5	4	4	4	1
Romania	1	1	3	24	2	2	2	2	2	4	3	4	5	4	3	3	3	4	1	3	3	3	3	1	1	1	2	5	4	4	4	4	4	4	4	4	.	.	.
Romania	1	1	3	.	1	.	.	.	.	3	4	.	3	4	3	2	2	3	4	.	.	.	3	3	4	4	3	5	5	5	5	4	3	3	5	4	3	3	1
Romania	1	1	4	24	2	.	.	.	.	5	3	5	4	4	4	3	3	4	5	5	4	3	5	4	4	3	4	5	5	5	5	5	5	5	5	5	3	5	2
Romania	1	1	2	.	2	.	.	.	.	5	5	5	5	5	5	5	5	5	5	.	.	.	.	3	5	5	5	5	5	5	5	5	4	4	5	4	6	4	6
Romania	1	1	.	.	1	1	1	1	1	1	1	1	1	1	1	1	1	4	1	4	2	3	3	2	2	2	2	5	5	5	5	4	4	.	.	.	4	4	4
Romania	1	1	1	.	2	3	3	3	3	5	4	4	5	5	1	1	1	5	5	5	.	.	.	1	2	1	3	4	5	1	1	4	4	5	5	5	2	3	.
Romania	1	1	2	.	2	.	.	.	.	5	4	4	5	5	2	4	3	4	.	4	.	.	.	3	5	5	5	5	5	5	5	5	5	5	5	5	3	3	1
Romania	1	1	2	.	2	1	1	.	1	5	5	4	5	5	1	1	.	5	4	1	5	.	4	4	4	4	4	4	4	5	5	4	5	5	5	4	6	4	3
Romania	1	1	2	.	2	.	.	.	.	4	4	4	5	5	4	4	5	4	4	.	5	4	.	4	5	3	2	5	5	5	5	5	4	5	5	4	5	4	1
Romania	1	1	2	.	2	2	4	.	.	5	4	4	4	5	4	4	4	4	.	4	.	.	.	1	2	2	4	5	5	5	1	2	3	4	4	4	4	2	1
Romania	1	1	1	.	2	.	.	.	.	5	4	2	2	4	3	4	.	1	.	5	.	.	.	1	3	2	2	5	5	5	5	5	5	5	5	5	4	4	1
Romania	1	1	2	.	2	5	5	5	5	5	4	4	3	4	3	2	.	3	.	.	3	3	.	3	5	4	3	5	5	5	5	5	5	4	5	4	5	4	2
Romania	1	1	2	.	2	4	2	4	3	5	4	3	5	5	4	3	3	2	4	5	3	4	4	4	4	5	1	3	3	5	5	3	4	4	2	3	.	.	.
Romania	1	1	2	.	2	.	3	3	3	4	4	2	2	1	2	2	2	2	1	3	.	3	.	1	1	2	1	2	1	5	5	4	4	4	4	2	4	4	2
Romania	1	1	2	.	2	.	.	.	.	4	5	4	4	5	4	4	4	4	4	4	.	.	.	3	5	4	4	5	5	5	5	5	5	5	5	5	5	4	1
Romania	1	1	2	.	2	.	.	.	.	5	5	3	3	5	4	4	4	4	.	5	4	5	.	2	3	3	4	5	5	5	5	4	4	5	5	5	6	4	2
Romania	1	1	2	.	2	.	.	.	.	5	4	3	5	4	1	1	.	2	.	5	.	.	.	1	3	3	1	5	5	5	5	5	5	5	5	5	2	2	1
Romania	1	1	3	.	1	4	2	4	2	3	4	4	4	4	4	4	.	4	4	4	.	.	4	3	4	4	4	5	5	5	5	5	5	5	5	5	4	4	1
Romania	1	1	3	.	2	.	.	.	.	5	2	1	4	5	4	4	.	4	.	.	4	.	5	4	2	4	3	5	5	5	5	4	4	4	4	3	4	3	1
Romania	1	1	2	.	2	3	4	2	4	5	5	5	5	5	4	4	4	4	4	5	4	5	4	4	4	4	5	4	4	5	5	3	4	5	5	5	4	3	2
Romania	1	1	2	.	2	.	.	.	.	5	1	2	.	4	2	2	1	3	.	.	.	.	.	3	5	4	1	5	5	5	5	5	5	5	5	4	4	3	1
Romania	1	1	2	42	2	5	5	5	2	4	5	4	4	5	4	4	4	4	5	5	5	5	5	2	4	4	2	5	5	5	5	5	5	5	5	5	4	4	1
Romania	1	1	2	.	2	.	.	.	.	5	4	3	4	4	2	2	3	4	4	5	2	4	.	1	2	2	1	5	5	5	5	4	4	3	4	3	4	3	2
Romania	1	1	2	.	2	3	3	3	3	5	5	5	5	5	4	5	4	5	3	5	.	5	.	3	3	4	3	4	3	4	4	4	4	4	4	3	5	4	1
Romania	1	1	2	.	2	3	3	3	3	1	4	5	4	5	4	3	4	5	2	.	2	5	.	2	4	4	2	5	5	5	5	5	5	5	5	4	6	4	1
Romania	1	1	2	39	2	.	.	.	.	5	5	5	2	5	2	2	4	3	3	5	3	3	3	2	4	3	3	5	5	5	5	5	5	4	5	4	4	3	1
Romania	1	1	2	.	2	.	.	.	.	4	2	3	3	5	2	3	1	2	.	3	3	.	.	1	2	2	1	4	5	4	4	4	4	4	4	3	6	4	2
Romania	1	1	4	23	1	.	.	.	.	2	2	4	2	4	1	1	1	2	1	3	3	3	3	1	1	1	1	4	4	4	1	5	5	5	5	4	3	1	1
Romania	1	1	2	28	2	.	.	.	.	3	3	3	3	3	2	2	.	3	.	.	.	.	.	1	3	3	2	5	5	5	5	4	2	4	2	4	5	4	1
Romania	1	1	2	.	2	2	2	2	2	4	4	4	4	5	3	4	2	3	4	4	3	4	2	4	3	4	3	5	4	5	5	4	4	5	5	4	6	4	2
Romania	1	1	4	.	2	2	1	2	2	2	4	3	3	4	3	1	.	3	.	4	.	.	.	1	1	1	1	5	3	5	5	5	5	5	5	3	4	1	1
Romania	1	1	2	.	2	2	1	2	2	4	3	3	4	5	2	2	3	3	4	5	1	2	.	.	.	.	.	5	5	5	5	5	5	4	5	4	4	3	2
Romania	1	1	1	51	2	4	4	4	5	5	5	5	5	5	5	5	.	5	4	5	4	5	4	5	5	5	5	5	4	5	2	5	4	5	5	5	4	4	1
Romania	1	1	2	.	2	.	.	.	.	5	4	4	3	4	4	3	.	4	3	4	.	4	.	2	4	4	2	5	5	5	5	5	5	5	5	4	6	2	1
Romania	1	1	2	41	2	.	.	.	.	5	4	4	4	5	4	4	4	4	4	4	2	4	4	2	4	4	2	1	1	3	3	5	4	4	4	4	6	4	3
Romania	1	1	4	.	2	.	.	4	.	5	4	5	4	4	4	3	3	4	5	4	.	.	.	1	4	2	3	5	5	5	5	5	5	5	5	5	6	3	1
Romania	1	1	2	.	2	.	.	.	.	5	4	4	3	5	3	3	3	4	3	.	.	.	.	2	3	2	2	5	5	5	5	4	4	5	5	4	4	4	1
Romania	1	1	3	.	2	5	4	3	3	5	5	5	4	4	5	5	5	5	4	4	3	5	4	2	4	4	5	4	4	3	3	5	4	4	5	5	4	5	1
Romania	1	1	1	.	1	5	.	5	.	3	3	2	3	4	4	4	4	2	.	.	.	.	.	2	5	5	4	5	5	5	5	5	5	5	5	5	4	4	1
Romania	1	1	2	.	2	.	.	.	.	3	4	4	1	3	3	2	3	3	3	4	3	3	3	1	3	2	1	5	4	5	5	4	4	5	5	4	4	4	2
Romania	1	1	3	.	2	4	.	5	.	4	3	4	4	3	3	4	.	3	4	5	.	.	.	4	5	5	3	5	5	5	5	5	5	5	5	5	4	2	2
Romania	1	1	4	.	2	.	4	.	.	5	5	5	4	5	.	.	.	4	5	5	.	5	.	4	5	5	5	5	5	5	5	5	5	5	5	5	4	4	2
Romania	1	1	2	.	2	.	5	.	.	4	4	4	5	5	4	4	4	5	.	4	.	.	.	.	5	5	5	5	5	5	5	5	5	5	5	5	3	3	1
Romania	1	1	1	.	2	.	.	.	.	5	4	1	3	5	5	5	5	2	2	5	.	.	.	5	5	5	5	5	5	5	5	5	5	5	5	5	6	4	1
Romania	1	1	4	.	2	.	.	.	.	5	3	3	2	2	2	2	2	2	1	.	.	3	.	1	3	4	4	4	3	4	4	5	5	5	5	4	6	2	1
Romania	1	1	4	.	2	5	.	5	.	5	4	5	2	4	4	3	1	5	2	1	1	1	1	2	4	4	2	5	4	5	5	5	5	5	5	4	6	2	1
Romania	.	.	4	.	2	4	.	5	.	5	2	4	3	4	5	3	3	4	.	.	.	.	1	5	5	5	4	5	3	5	5	4	5	5	5	5	4	2	1
Romania	1	1	4	.	2	.	.	.	.	5	2	3	3	2	3	3	4	2	4	.	.	2	.	2	4	2	1	5	5	5	5	5	5	5	5	5	4	3	1
Romania	1	1	4	.	2	.	.	2	2	5	2	1	2	1	2	2	1	2	1	4	.	4	1	2	4	4	3	5	5	5	5	5	5	5	5	5	.	.	.
Romania	1	1	2	40	2	.	.	.	.	5	4	4	4	5	4	4	4	4	.	.	.	5	.	2	4	4	4	4	5	5	5	5	5	5	5	5	5	4	1
Romania	1	1	4	.	2	2	.	.	.	5	2	1	2	3	1	1	3	2	3	4	1	2	.	2	4	3	4	4	5	5	5	5	5	5	5	2	4	5	2
Romania	1	1	4	.	2	.	.	.	.	5	3	4	4	5	4	4	.	4	4	3	3	4	.	5	5	5	5	5	5	5	5	5	5	5	5	5	6	4	1
Romania	1	2	4	.	2	2	.	2	.	5	1	.	2	4	4	4	.	3	2	1	.	2	1	4	5	5	4	5	5	5	5	5	5	5	5	5	5	3	1
Romania	1	1	4	.	2	.	.	.	.	5	5	4	1	2	2	1	3	2	2	2	.	.	.	1	3	3	4	5	5	5	5	5	5	5	5	5	5	4	1
Romania	1	1	4	.	1	1	1	1	1	2	1	2	2	1	2	1	3	1	1	4	.	4	.	1	3	2	3	5	5	5	5	5	5	5	5	5	5	3	2
Romania	1	1	4	.	2	.	.	.	.	4	4	5	5	5	4	3	3	3	.	.	.	.	.	3	5	4	4	5	5	5	5	5	5	5	5	5	6	6	1
Romania	1	1	4	26	2	.	.	.	.	5	4	4	2	5	5	3	2	4	2	5	.	.	.	5	5	5	5	5	4	3	3	5	5	5	5	3	4	2	1
Romania	1	1	2	.	2	4	4	3	3	4	1	3	2	3	4	4	.	3	4	4	.	.	.	3	4	4	4	5	5	5	5	5	5	5	5	5	6	6	4
Romania	1	1	4	.	.	.	.	.	.	2	3	5	5	5	5	1	3	4	.	.	4	.	.	1	5	5	1	5	5	1	2	3	5	5	5	5	3	3	1
Romania	1	1	3	24	2	.	.	.	.	5	4	5	4	5	3	2	2	3	2	3	4	3	4	3	4	1	4	5	5	1	5	5	5	4	5	3	4	2	1
Romania	1	1	3	26	2	.	4	.	4	3	3	5	5	5	4	4	4	4	4	4	4	4	4	3	3	3	3	5	5	5	5	5	5	5	5	5	3	5	2
Romania	1	1	3	.	1	4	.	4	.	5	3	3	4	4	4	4	.	4	.	.	.	.	.	3	4	4	4	5	5	5	5	5	5	5	5	5	6	4	1
Romania	1	1	2	.	1	4	.	4	.	4	4	4	4	3	4	4	.	4	.	.	.	.	.	2	3	3	3	5	5	5	5	5	5	5	5	5	5	1	1
Romania	1	1	4	.	1	.	.	.	.	4	2	4	2	4	2	2	2	4	4	5	1	4	.	4	5	4	4	5	5	5	4	5	5	5	5	5	4	4	2
Romania	1	2	2	23	2	.	.	.	.	5	1	3	.	2	.	.	.	4	.	3	.	.	.	.	.	.	.	3	2	1	1	4	4	4	4	3	3	1	1
Romania	1	1	2	.	2	.	.	.	.	4	3	4	3	5	2	2	4	4	4	4	3	4	3	2	2	2	2	4	3	5	5	4	4	5	5	4	6	4	1
Romania	1	1	2	.	2	.	.	.	.	4	4	4	5	3	3	3	2	4	3	5	3	2	.	2	3	2	3	5	3	5	3	3	3	4	4	3	6	2	1
Romania	1	1	2	27	2	5	.	.	5	5	5	5	5	5	5	5	5	.	5	5	5	5	.	3	5	3	3	5	5	5	5	5	5	5	5	5	2	4	2
Romania	1	1	2	23	2	.	4	.	3	5	4	3	.	.	2	2	2	2	.	5	.	2	.	1	1	1	1	5	5	5	5	4	5	3	5	4	4	2	1
Romania	1	1	2	.	2	.	.	.	.	5	1	3	4	4	3	5	5	4	3	4	3	5	3	3	5	4	3	5	5	5	5	5	4	5	5	3	6	3	1
Romania	1	1	2	.	2	4	.	.	.	5	4	4	4	4	4	4	4	4	4	5	.	4	.	3	4	2	3	5	4	5	5	4	5	5	5	4	4	3	2
Romania	1	1	2	.	2	.	.	.	.	5	5	4	4	5	4	5	4	3	.	4	2	5	.	4	3	3	3	5	5	5	3	5	5	5	5	4	6	4	1
Romania	1	1	2	.	2	.	.	.	3	4	4	4	.	4	4	4	3	3	.	.	.	.	.	3	4	3	2	5	4	2	2	5	4	2	5	2	3	2	1
Romania	1	1	2	.	2	2	.	1	1	3	1	1	3	5	1	1	1	2	1	5	1	.	.	1	1	3	4	5	2	1	5	5	5	5	5	2	4	3	1
Romania	1	1	2	.	2	.	.	.	.	5	1	5	5	5	1	1	3	2	.	5	4	4	.	1	3	1	5	5	5	5	5	5	5	5	5	4	6	4	1
Romania	1	1	2	.	2	.	1	3	5	4	3	2	4	5	2	2	4	4	3	5	2	3	2	2	4	3	2	5	5	5	5	5	5	5	5	5	6	4	3
Romania	1	1	2	.	2	.	.	.	3	5	3	4	4	5	4	5	3	4	.	5	2	4	.	3	4	4	3	.	5	3	2	5	5	5	5	5	5	4	3
Romania	1	1	2	.	2	.	.	.	.	5	5	5	5	5	5	4	5	5	4	5	4	5	3	2	4	4	4	5	5	5	5	5	4	4	5	4	3	3	1
Romania	1	1	2	.	2	1	3	1	1	3	2	4	2	1	2	2	.	3	.	4	3	4	1	1	1	2	2	5	5	3	1	5	5	5	5	4	3	3	1
Romania	1	1	2	.	2	.	.	.	.	5	4	4	.	5	5	5	4	4	.	.	.	4	.	4	5	4	4	5	5	5	5	5	5	5	5	5	4	4	1
Romania	1	1	2	.	2	.	3	.	3	5	4	4	4	5	4	4	4	4	4	4	3	4	4	2	4	4	.	5	5	5	1	4	4	4	4	4	4	4	1
Romania	1	1	2	.	2	2	3	3	2	5	2	2	4	4	3	3	3	2	.	4	2	3	4	2	4	3	3	5	3	3	5	3	4	4	4	4	3	3	1
Romania	1	1	2	.	2	2	2	2	3	5	2	4	4	4	4	2	3	2	4	5	4	4	3	2	4	2	3	5	4	5	5	5	5	5	5	5	5	4	1
Romania	1	1	2	.	2	.	.	.	.	5	2	3	3	4	3	4	3	4	3	5	4	3	4	1	3	3	3	1	3	1	1	4	4	4	5	4	3	4	4
Romania	1	1	2	.	2	.	.	.	.	4	3	1	2	5	3	4	.	2	.	5	.	3	.	2	4	4	4	5	2	5	5	4	5	5	5	3	6	4	2
Romania	1	1	2	.	2	.	2	.	2	3	1	3	3	1	2	2	.	3	.	3	1	.	.	3	3	2	2	5	5	1	1	3	5	3	5	2	3	3	1
Romania	1	1	2	.	2	.	.	.	.	4	4	2	3	5	3	3	.	4	4	4	5	3	.	1	3	4	4	5	5	5	5	4	4	5	5	4	6	6	2
Romania	1	1	2	.	2	.	.	.	.	5	4	.	5	5	5	5	5	4	3	4	4	3	3	4	5	5	4	5	5	5	5	5	5	5	5	5	6	4	1
Romania	1	3	2	35	2	.	.	.	.	5	2	5	4	5	5	4	5	5	5	5	.	5	.	5	5	5	4	5	5	5	5	5	5	5	5	5	4	4	2
Romania	1	1	2	.	2	1	1	1	1	4	4	2	2	4	1	1	4	1	3	4	3	3	3	3	4	4	1	5	5	5	5	5	5	5	5	5	4	2	3
Romania	1	1	2	.	2	2	2	2	2	2	4	4	3	5	2	5	3	4	3	5	3	4	4	2	5	4	3	5	5	4	5	1	2	4	5	5	3	3	1
Romania	1	1	2	.	2	3	3	3	3	3	3	3	3	3	3	3	1	3	3	3	1	1	.	2	3	3	3	5	5	5	5	5	4	5	5	5	4	2	1
Romania	1	1	2	.	2	.	2	.	3	4	3	4	5	5	3	4	3	4	3	5	2	5	1	.	5	2	5	5	4	2	5	5	5	5	5	4	6	4	1
Romania	1	1	2	.	2	.	5	4	5	5	5	5	5	5	5	5	5	5	4	5	3	5	.	4	4	5	4	5	5	5	5	5	3	5	5	4	5	4	2
Romania	1	2	4	24	2	.	.	.	2	5	4	3	4	1	2	1	3	2	3	.	.	.	3	3	3	1	1	5	5	5	5	5	4	4	5	5	6	4	1
Romania	1	1	2	24	2	.	4	.	.	5	5	4	5	5	2	2	3	4	4	5	2	4	.	1	3	3	5	5	5	5	5	5	5	5	5	5	4	2	1
Romania	1	1	2	35	2	3	3	.	.	5	4	4	4	5	5	5	3	2	2	5	2	5	.	4	4	2	2	5	2	5	5	5	5	5	5	2	6	2	2
Romania	1	1	2	.	2	.	.	.	.	5	4	4	4	5	4	4	.	4	.	4	.	.	.	3	3	4	3	5	5	4	4	4	4	4	5	4	5	4	1
Romania	1	1	2	.	2	.	.	.	.	5	4	4	5	4	4	4	4	4	3	3	1	1	2	4	5	4	5	5	5	5	5	5	5	5	5	5	3	4	1
Romania	1	1	2	.	2	.	.	.	.	5	2	2	3	5	3	3	.	4	3	3	3	3	3	3	3	2	2	5	3	1	5	5	5	5	4	3	4	3	1
Romania	1	1	2	.	2	.	.	4	4	5	5	5	5	5	4	4	4	4	5	4	4	4	4	5	5	5	5	5	5	5	5	5	5	5	5	4	5	3	1
Romania	1	1	2	.	2	.	.	.	.	5	4	4	5	5	4	4	4	4	4	3	3	3	3	4	3	3	2	5	5	5	5	4	4	4	4	3	4	2	1
Romania	1	1	1	.	1	.	4	.	4	4	3	3	5	4	1	1	.	2	1	.	2	1	.	1	1	2	4	5	4	5	5	4	4	2	3	2	5	4	1
Romania	1	1	2	.	1	.	.	.	.	5	4	4	4	5	3	4	.	4	4	3	3	4	3	5	5	4	4	5	5	5	5	5	5	5	.	5	4	3	1
Romania	1	1	2	.	2	.	.	.	.	5	5	5	5	5	5	5	5	5	.	5	5	5	.	3	4	4	4	5	5	5	5	5	5	5	5	4	6	4	2
Romania	1	1	2	.	1	1	1	.	.	5	5	5	5	5	1	1	1	5	.	.	4	.	.	1	2	2	2	5	5	5	5	5	3	5	5	2	.	.	.
Romania	1	3	1	.	1	.	.	.	.	5	5	5	3	5	3	3	4	4	3	3	3	3	3	1	3	1	1	4	3	5	5	4	4	4	4	4	4	4	1
Romania	1	1	2	.	2	.	.	.	.	5	1	2	2	3	5	5	.	2	.	3	1	1	.	5	4	3	5	5	4	3	5	5	5	5	5	3	4	2	1
Romania	1	2	4	24	2	4	3	5	1	5	5	5	4	3	4	4	4	5	4	3	2	5	4	2	4	5	5	5	5	5	5	5	4	5	5	5	5	3	2
Romania	1	1	2	.	2	5	5	5	5	5	4	5	.	5	5	5	5	4	.	.	5	5	.	4	5	4	4	5	5	1	5	5	5	1	5	5	4	4	2
Romania	1	1	2	.	2	.	4	.	4	5	3	4	3	5	2	2	.	3	.	.	3	3	.	1	2	2	1	5	5	5	4	5	5	5	5	5	4	2	1
Romania	1	1	2	.	2	.	3	4	.	5	2	3	4	5	4	4	.	4	4	.	4	.	.	3	4	4	4	5	5	5	5	5	5	5	2	5	4	4	1
Romania	1	1	2	.	2	4	4	.	.	5	5	5	5	5	5	5	5	5	4	5	4	5	5	3	5	5	5	3	3	4	4	5	5	5	5	4	6	3	3
Romania	1	1	2	.	2	3	3	.	5	5	5	5	5	5	4	5	4	5	5	5	5	5	5	3	1	4	3	5	5	5	5	4	5	5	5	5	4	4	3
Romania	1	2	2	37	2	.	3	.	3	5	5	4	4	5	2	2	4	4	4	4	2	4	3	1	2	2	1	5	4	5	5	4	4	4	4	2	2	2	1
Romania	1	1	3	24	2	.	.	.	.	5	1	4	3	5	2	2	4	2	2	4	.	4	.	1	1	4	2	5	5	5	5	5	5	4	5	3	3	3	1
Romania	1	1	3	24	2	5	.	.	.	4	5	5	5	5	4	4	.	4	4	3	2	4	.	4	5	5	4	5	5	5	5	5	5	5	5	5	5	5	1
Romania	1	1	3	.	2	5	2	5	2	4	4	5	5	5	4	4	4	5	4	4	4	5	4	3	4	5	3	5	5	5	5	5	5	5	5	5	4	4	1
Romania	1	2	2	46	2	3	3	3	3	3	3	2	5	5	3	3	3	2	.	3	1	1	.	2	3	4	4	5	5	5	5	4	5	5	5	3	4	2	1
Romania	1	1	3	.	2	.	.	4	.	1	1	5	5	5	4	3	3	4	4	3	.	.	.	3	4	3	3	5	5	5	5	5	5	5	5	4	3	3	1
Romania	1	2	2	23	2	.	.	.	.	5	5	4	4	5	1	1	1	5	5	5	.	5	.	1	3	3	4	5	5	5	5	5	5	5	5	5	3	3	1
Romania	1	2	2	.	2	5	5	5	5	5	4	5	4	5	5	5	4	5	4	3	.	.	.	1	4	3	1	5	5	5	5	3	4	5	5	5	4	2	1
Romania	1	1	2	.	2	.	.	.	.	5	.	5	3	5	5	5	5	5	.	5	5	4	.	4	4	4	4	4	3	2	3	4	3	4	3	2	6	4	1
Romania	1	1	4	24	2	4	4	.	.	1	1	4	4	5	4	5	.	4	4	3	3	4	3	4	5	5	5	5	5	5	5	5	5	5	5	3	5	3	1
Romania	1	1	3	24	2	.	.	.	.	1	1	5	2	4	4	4	4	4	3	3	3	4	3	2	4	5	3	5	5	5	5	5	5	4	5	4	6	2	1
Romania	1	2	2	50	2	.	.	.	.	5	5	5	5	5	5	4	5	5	5	5	4	5	5	3	3	3	3	5	5	5	5	3	3	5	5	3	3	3	1
Romania	1	1	3	24	1	3	.	3	.	3	2	5	4	5	4	4	4	4	2	3	.	4	3	2	4	5	3	5	5	5	5	5	5	4	5	4	1	1	1
Romania	1	1	2	.	2	4	4	4	4	5	5	5	5	5	3	4	3	5	4	4	.	.	.	4	5	1	2	5	5	5	5	5	5	5	5	5	6	6	1
Romania	1	1	3	.	2	.	.	.	.	4	1	4	3	4	2	3	.	3	.	.	.	.	.	2	2	4	4	5	5	5	5	5	5	5	5	5	6	3	1
Romania	1	1	2	.	2	4	.	4	4	5	4	4	4	5	5	3	5	5	5	5	.	5	.	.	5	4	5	5	5	5	5	5	5	5	5	4	4	5	3
Romania	1	1	4	.	2	5	.	.	.	2	2	2	4	2	4	3	2	2	1	.	.	1	.	3	4	4	2	5	4	5	5	5	5	5	5	5	5	3	1
Romania	1	1	3	.	1	.	.	.	.	5	.	.	3	1	3	2	.	2	.	.	1	.	.	2	3	5	2	5	5	5	5	5	5	5	5	5	4	1	1
Romania	1	1	3	.	2	.	.	.	.	4	3	4	1	4	3	3	3	2	5	.	.	1	.	2	3	3	3	5	5	5	5	5	5	5	5	5	6	5	2
Romania	1	1	3	.	1	.	.	.	.	4	1	2	3	3	4	2	.	3	.	.	.	.	.	4	5	4	2	5	5	5	3	5	5	5	5	5	4	3	1
Romania	1	1	3	.	2	.	.	2	2	5	2	1	4	1	1	1	3	1	2	1	2	1	1	1	2	1	1	5	5	5	3	3	3	4	4	1	2	1	1
Romania	1	1	3	.	2	.	.	.	.	4	4	3	3	1	3	4	3	2	3	.	.	.	.	1	2	2	2	5	5	5	5	5	5	5	5	5	3	3	.
Romania	1	1	3	.	1	4	4	4	4	2	2	2	3	4	1	1	2	1	3	3	3	3	3	1	2	3	1	5	5	3	3	5	5	5	5	5	1	1	1
Romania	1	1	3	.	1	.	.	.	.	4	3	5	4	4	4	4	4	4	3	3	3	3	3	3	4	4	3	5	5	5	5	5	5	5	5	5	6	4	1
Romania	1	1	4	.	2	2	.	.	.	5	2	2	1	2	2	2	2	2	3	3	.	2	.	4	3	2	1	5	5	5	5	4	5	4	5	4	6	2	1
Romania	1	1	3	.	1	3	3	4	.	4	1	2	1	1	1	2	.	1	1	1	1	1	1	1	2	2	1	4	5	5	5	5	5	4	4	4	.	.	.
Romania	1	1	3	.	1	.	.	.	.	1	2	1	1	1	2	1	.	1	.	.	.	.	.	1	4	3	2	5	3	5	1	4	4	5	5	5	4	3	1
Romania	1	1	4	.	2	4	3	3	3	4	3	2	2	4	4	3	3	4	3	4	3	5	4	2	2	1	1	5	3	4	1	5	5	5	5	3	6	6	1
Romania	1	1	3	.	2	4	.	.	.	5	3	4	4	5	3	4	3	4	.	3	3	3	3	3	4	4	3	5	5	4	1	4	3	5	4	4	3	3	1
Romania	1	1	4	.	2	4	.	4	.	5	4	5	3	1	2	2	.	2	2	3	.	5	.	2	4	4	1	5	5	4	1	5	5	5	5	5	6	5	1
Romania	1	1	2	23	1	.	.	.	.	5	4	4	4	5	4	4	3	4	4	4	.	4	.	4	4	4	5	5	5	5	5	5	5	5	5	5	6	3	1
Romania	1	1	2	.	2	.	.	.	.	5	5	3	3	5	3	.	3	4	.	4	3	.	.	2	3	4	4	5	5	5	5	4	5	5	5	3	4	3	1
Romania	1	1	4	.	2	2	1	4	3	3	3	4	2	4	4	5	3	3	2	4	.	.	.	1	2	3	1	5	5	4	4	5	5	5	5	4	4	3	1
Romania	1	1	4	.	2	3	2	3	2	4	4	5	4	4	4	4	3	4	4	3	.	.	.	2	3	4	1	5	3	1	1	5	4	4	4	4	6	5	1
Romania	1	1	4	.	1	2	2	1	1	4	4	4	1	5	2	2	4	3	.	.	.	.	.	1	1	1	3	5	5	1	5	5	5	5	5	5	4	1	1
Romania	1	1	3	.	1	3	3	3	3	3	3	3	3	5	4	5	5	4	3	3	3	5	5	4	4	4	4	5	5	5	5	5	5	5	5	5	6	5	6
Romania	1	1	4	.	2	4	.	.	.	5	3	4	4	4	4	4	.	3	3	3	2	4	3	2	3	4	2	5	5	2	3	5	5	5	5	4	6	4	1
Romania	1	1	4	.	2	3	3	2	.	4	3	5	4	5	3	3	.	4	3	.	.	4	.	2	2	3	2	5	5	5	5	5	5	5	5	4	5	2	1
Romania	1	1	4	.	2	.	.	.	.	5	5	5	4	5	4	4	.	2	4	2	3	2	2	1	1	4	1	5	5	5	5	5	5	5	5	5	5	4	1
Romania	1	1	4	.	2	.	.	.	.	5	3	3	5	5	4	3	.	4	4	3	.	5	.	1	4	3	3	5	5	5	5	5	5	5	5	5	5	5	1
Romania	1	2	4	23	2	.	.	.	.	5	5	5	2	5	4	4	4	4	4	.	.	4	.	2	4	2	5	5	5	4	4	5	5	5	5	5	6	4	2
Romania	1	2	3	23	2	3	4	.	.	4	5	4	4	5	4	4	4	3	.	.	.	4	.	3	4	5	3	5	4	3	1	5	5	5	5	4	4	3	1
Romania	1	1	4	.	2	4	4	4	.	5	4	4	4	5	5	5	4	5	4	.	.	.	.	4	5	5	4	5	5	5	5	5	5	5	5	5	5	4	1
Romania	1	1	4	.	2	5	5	5	5	5	5	5	5	5	5	5	5	5	5	5	5	5	5	4	5	5	5	5	5	5	5	5	5	5	5	5	.	.	.
Romania	1	1	4	.	2	5	.	.	.	5	4	2	2	3	1	1	1	2	2	4	3	4	3	1	3	2	4	5	3	5	5	5	4	4	5	4	5	4	1
Romania	1	2	3	24	2	.	.	.	.	5	4	.	5	5	5	5	5	5	.	.	.	.	.	4	5	5	4	5	5	5	5	5	5	5	5	5	2	1	1
Romania	1	1	4	.	2	.	.	4	.	5	5	4	5	5	4	4	.	4	4	2	.	.	.	5	5	5	4	5	5	5	5	4	4	5	5	4	5	3	1
Romania	1	1	4	.	2	4	4	.	.	5	4	5	5	5	4	4	4	4	4	.	.	.	.	3	4	4	4	5	5	5	5	5	5	5	5	5	2	2	1
Romania	1	1	4	.	2	.	.	.	.	5	4	4	2	4	2	4	3	2	3	1	.	2	.	1	4	2	2	3	5	5	2	5	5	5	5	4	4	4	1
Romania	1	1	4	.	2	.	.	.	.	5	2	4	4	1	3	1	4	2	.	.	.	.	.	2	3	3	2	4	4	4	4	5	5	5	5	5	6	4	1
Romania	1	1	3	.	2	4	4	4	4	5	4	4	2	4	4	4	4	2	3	.	.	.	.	2	5	4	4	5	5	5	5	5	5	5	5	4	6	4	1
Romania	1	1	3	.	2	1	1	1	1	5	5	3	1	3	1	1	4	1	4	4	1	4	1	2	1	3	2	5	3	3	5	3	3	3	3	3	6	1	1
Romania	1	1	4	.	2	4	4	4	4	5	4	4	4	4	4	4	4	4	.	4	.	5	.	2	4	4	1	5	5	5	5	5	5	5	5	4	6	6	1
Romania	1	1	4	.	1	3	3	.	.	5	4	4	.	5	5	5	4	4	5	5	.	5	3	4	5	4	4	5	5	5	5	5	5	5	5	5	6	1	1
Romania	1	1	3	.	1	4	4	3	4	4	4	5	3	4	5	4	2	3	4	4	4	4	4	3	.	4	4	5	5	5	5	4	4	5	5	5	5	4	2
Romania	1	1	4	.	2	.	.	3	.	4	4	5	4	4	4	4	.	3	.	2	5	4	.	2	3	3	4	5	5	5	5	5	5	5	5	5	5	4	1
Romania	1	1	4	23	2	.	.	.	.	5	2	3	4	4	3	3	3	3	4	3	2	4	3	3	4	3	2	5	3	5	5	4	5	5	5	4	5	5	1
Romania	1	1	3	.	1	2	2	3	3	5	3	3	3	4	3	3	.	1	1	.	.	.	.	2	3	3	2	5	5	5	5	5	5	5	3	5	4	2	1
Romania	1	1	4	.	1	.	.	.	.	4	5	3	4	4	4	3	3	4	4	3	4	4	.	5	5	4	3	5	3	5	5	5	5	5	5	5	5	4	2
Romania	1	1	4	.	2	.	.	.	.	5	2	2	2	4	4	4	4	2	3	4	3	4	3	4	4	4	3	5	5	5	5	5	5	5	5	5	4	4	1
Romania	1	1	4	.	1	4	5	5	.	5	5	3	4	5	4	4	5	4	.	4	.	5	.	4	5	5	3	5	5	5	1	5	5	5	5	5	6	4	2
Romania	1	1	4	.	2	.	.	3	.	5	4	2	3	3	2	3	3	1	2	1	.	4	.	1	3	2	3	5	5	3	3	4	3	5	5	4	5	3	1
Romania	1	1	2	.	2	.	4	.	.	5	4	4	4	3	3	3	3	4	3	5	3	2	.	.	4	4	4	5	4	5	5	4	4	4	4	4	5	3	1
Romania	1	1	2	.	2	.	4	4	.	5	4	5	4	5	4	4	4	4	5	.	.	4	.	2	3	3	4	5	5	5	5	4	4	4	5	4	4	3	1
Romania	1	1	2	.	2	4	4	5	5	5	2	1	4	3	2	2	5	3	5	5	.	4	5	2	5	5	5	5	5	5	5	5	5	5	5	5	4	2	3
Romania	1	1	4	.	1	4	4	4	4	5	5	5	5	5	3	4	4	4	.	.	.	4	4	3	4	4	5	5	5	5	5	5	5	5	5	5	6	4	4
Romania	1	1	1	.	2	3	3	3	3	5	3	3	4	5	2	.	.	2	.	.	.	.	.	3	5	3	3	5	5	5	5	5	5	4	4	4	4	3	1
Romania	1	1	3	.	2	.	.	.	.	4	4	4	4	5	5	5	4	4	5	4	.	4	.	5	5	5	5	5	5	5	5	5	5	5	5	5	4	4	2
Romania	1	1	4	.	1	.	.	.	.	5	4	5	5	5	2	2	4	4	4	.	.	4	.	3	4	3	3	5	5	5	5	4	3	5	5	5	.	.	.
Romania	1	1	3	.	2	.	.	.	.	5	5	5	5	5	4	4	4	4	4	4	.	4	4	3	4	4	4	5	5	5	5	5	5	5	5	5	4	5	1
Romania	1	1	3	.	2	4	4	3	3	3	3	3	4	1	2	2	3	4	4	4	.	4	.	3	4	3	.	5	5	5	5	5	3	5	3	4	1	1	2
Romania	1	2	4	.	2	.	.	.	.	5	5	4	3	5	4	4	5	4	4	3	3	5	3	3	5	4	4	5	5	5	5	4	4	4	5	4	4	3	1
Romania	1	1	2	35	2	.	.	.	.	4	3	5	4	5	4	4	.	4	4	4	.	.	.	1	2	4	3	4	4	4	4	4	4	4	4	3	3	3	1
Romania	1	1	2	.	4	.	.	.	.	2	4	5	4	5	3	3	4	3	3	3	3	5	3	3	3	3	3	5	5	5	5	3	3	3	3	3	5	4	3
Romania	1	2	4	23	2	.	.	.	.	4	3	4	4	2	2	2	2	3	2	2	2	3	.	3	4	2	2	5	5	5	5	4	4	4	5	4	4	3	1
Romania	1	1	4	23	2	.	.	.	.	4	4	5	5	5	4	3	3	4	4	4	.	3	.	3	4	4	4	5	2	4	5	5	5	5	5	4	5	3	1
Romania	1	1	3	.	2	.	.	.	.	2	1	1	1	1	1	1	1	1	3	5	3	1	3	5	5	5	5	5	5	5	5	5	5	5	5	5	5	4	2
Romania	1	1	1	.	2	4	.	4	.	5	4	5	5	5	4	4	3	3	4	3	.	4	.	4	4	5	4	5	5	5	5	5	5	4	5	4	.	.	.
Romania	1	2	3	.	2	4	5	4	4	5	5	5	5	5	5	5	5	5	5	4	3	3	3	3	5	3	5	5	5	5	3	5	5	5	5	5	4	4	1
Romania	1	1	2	.	2	.	.	.	.	5	5	5	5	5	5	5	5	5	.	5	.	5	.	4	5	5	5	5	5	5	5	5	5	5	5	5	3	5	1
Romania	1	1	1	42	1	.	.	.	.	5	5	5	5	5	5	5	5	5	3	4	.	.	.	3	3	5	5	4	4	4	4	4	4	4	4	4	5	5	2
Romania	1	2	2	23	2	5	5	5	5	5	5	5	5	5	5	5	5	5	5	5	4	5	5	5	5	5	5	5	5	5	5	5	5	5	5	5	6	6	2
Romania	1	1	2	28	1	.	.	.	.	5	5	5	5	5	5	5	5	5	5	3	.	5	1	4	5	5	5	5	5	5	5	4	4	4	4	4	6	6	2
Romania	1	1	2	.	2	.	.	.	.	2	5	2	3	2	1	1	3	3	3	1	.	.	.	5	5	1	1	5	5	5	5	5	5	5	5	5	.	.	.
Romania	1	1	2	.	2	.	1	.	.	1	2	2	1	1	1	1	.	1	.	3	1	1	.	1	2	1	1	4	1	1	5	2	3	3	4	1	2	1	1
Romania	1	1	4	.	2	.	4	.	4	5	5	5	5	5	4	4	5	5	.	4	.	4	.	1	4	3	1	5	5	5	5	4	4	4	5	4	6	3	1
Romania	1	1	1	.	2	.	.	.	.	4	5	5	5	5	4	4	4	4	.	.	.	5	.	2	4	4	2	5	3	5	5	5	5	5	5	4	4	4	1
Romania	1	1	4	.	2	2	2	2	2	5	4	4	4	4	2	2	3	4	2	4	3	4	3	1	2	1	4	5	5	4	2	5	5	5	5	5	6	6	3
Romania	1	1	2	.	2	.	.	.	.	5	4	4	5	5	1	1	.	4	2	2	.	.	.	1	2	4	4	5	5	5	5	5	5	5	5	5	6	5	2
Romania	1	1	2	23	2	1	.	1	.	.	.	3	.	.	2	.	.	1	3	2	1	3	3	1	1	3	1	5	5	5	5	3	5	4	4	3	4	2	1
Romania	1	2	2	24	1	4	3	4	3	5	4	3	2	1	5	4	3	5	4	3	5	3	2	4	2	1	5	3	.	1	4	5	4	2	1	5	1	6	5
Romania	1	1	3	.	1	.	.	.	.	5	4	5	5	4	4	4	4	4	.	.	.	.	.	5	5	4	3	5	5	5	5	5	5	5	5	5	6	6	1
Romania	1	1	1	.	2	4	4	4	4	5	5	5	5	5	4	4	4	5	4	3	3	5	3	1	3	3	4	5	5	5	5	5	5	5	5	5	2	4	1
Romania	1	1	4	.	2	4	.	.	.	5	5	5	5	5	5	5	5	5	5	5	.	5	.	4	5	5	5	5	5	5	5	5	5	5	5	5	5	5	2
Romania	1	1	4	.	2	.	.	.	.	5	4	5	5	5	4	4	4	4	3	3	.	4	.	5	4	5	5	3	5	1	5	5	5	5	5	4	5	4	1
Romania	1	2	1	24	2	1	1	.	.	3	3	5	3	5	1	.	4	4	2	3	1	4	1	1	1	3	3	5	3	4	3	5	4	4	5	3	1	2	1
Romania	1	1	2	23	2	.	.	.	.	4	4	4	4	3	3	2	3	4	3	3	1	3	3	1	3	3	3	5	5	5	5	5	5	4	5	5	4	3	2
Romania	1	1	1	.	2	.	.	1	.	2	3	2	2	3	1	1	2	1	3	3	2	1	1	2	1	1	1	5	5	1	5	5	5	4	5	4	2	2	1
Romania	1	1	2	.	2	5	5	4	4	5	5	4	3	4	5	5	5	4	4	.	.	.	5	5	5	5	5	5	5	5	5	5	5	5	5	4	4	2	1
Romania	1	1	3	.	1	2	4	3	3	4	5	5	4	4	5	5	5	5	5	5	5	5	5	3	4	3	5	5	5	5	5	5	5	5	5	5	4	4	4
Romania	1	2	4	24	2	.	2	.	.	1	1	1	1	2	1	4	4	2	1	1	1	2	1	3	1	2	2	5	5	5	5	5	5	5	5	5	3	4	1
Romania	1	2	2	.	2	4	4	.	.	5	5	5	5	5	4	.	.	4	4	4	3	3	3	5	5	5	4	5	5	5	5	4	4	4	4	4	4	4	3
Romania	1	2	2	.	2	.	.	.	.	5	2	4	5	5	5	5	.	5	.	5	.	.	.	4	5	5	5	3	5	5	1	5	5	5	5	5	2	6	1
Romania	2	1	2	.	2	2	1	.	.	3	2	3	.	4	1	1	1	3	3	4	3	3	.	1	1	1	1	2	2	5	2	4	4	3	5	3	2	2	2
Romania	1	1	2	.	2	1	1	1	1	5	5	5	5	5	4	1	1	5	5	1	5	5	5	1	1	1	1	5	2	5	5	4	4	5	5	4	5	2	1
Romania	1	1	2	.	2	4	4	.	.	5	4	5	5	5	4	4	4	4	4	4	4	4	4	3	3	3	4	5	5	5	5	4	4	4	4	4	.	.	.
Romania	1	1	2	.	2	.	.	.	.	5	5	5	5	5	4	4	.	4	4	4	4	4	.	2	4	3	2	5	5	5	5	5	5	5	5	5	3	3	1
Romania	2	1	2	.	2	4	4	4	4	5	4	5	5	5	5	5	5	5	5	5	.	4	.	3	4	4	2	5	5	5	5	4	4	4	4	4	3	2	1
Romania	1	2	2	35	1	5	5	5	5	5	5	5	5	5	5	5	5	5	5	5	5	5	5	2	2	2	2	4	4	4	4	4	4	4	4	4	4	4	1
Romania	1	2	2	23	2	.	.	.	.	3	3	5	5	5	4	4	.	5	.	5	.	.	.	1	5	5	3	5	5	5	5	5	5	5	5	5	4	1	1
Romania	1	1	2	.	2	4	5	.	.	5	.	5	5	5	3	1	.	1	1	1	1	1	1	1	1	1	1	5	5	5	5	5	5	5	5	5	5	4	1
Romania	1	1	2	.	2	2	5	3	3	4	4	4	5	5	3	3	5	3	1	3	4	.	.	2	3	4	3	5	4	4	5	5	4	4	5	3	4	2	2
Romania	1	1	2	.	2	4	3	4	4	5	5	5	5	5	2	3	3	4	3	4	3	3	3	1	4	4	5	2	2	1	5	5	4	5	5	4	6	3	1
Romania	1	1	2	.	2	3	.	3	.	5	5	5	5	4	4	4	3	5	3	4	3	4	3	1	4	2	1	5	3	5	5	5	5	5	5	2	4	3	1
Romania	1	1	2	.	2	3	.	4	5	5	5	5	5	5	5	5	5	5	5	5	5	5	5	5	5	5	5	5	5	5	5	5	5	5	5	5	6	5	4
Romania	1	1	2	39	2	4	3	4	4	5	5	5	5	5	5	5	5	5	4	5	5	5	5	3	5	5	5	4	4	2	3	5	5	4	4	4	6	5	2
Romania	1	1	2	.	2	3	.	.	.	4	1	.	5	4	4	3	.	4	5	.	.	4	.	1	4	2	4	5	5	5	5	5	5	5	5	4	5	3	1
Romania	1	1	2	.	2	.	.	.	.	5	4	5	5	5	4	4	4	5	3	4	4	.	3	3	5	4	4	5	5	5	5	5	5	5	5	5	6	5	1
Romania	1	1	2	.	2	4	.	4	.	5	2	3	4	5	4	5	.	4	3	3	3	3	3	1	3	4	4	5	5	5	5	5	5	5	5	5	4	2	1
Romania	1	1	2	.	2	.	.	.	.	5	5	5	5	5	4	4	5	5	4	4	3	3	3	4	5	5	4	5	5	5	5	5	5	5	5	5	4	4	1
Romania	1	1	2	.	2	.	.	.	.	4	5	5	5	5	4	4	4	4	2	5	2	4	1	3	4	2	3	4	3	2	3	5	3	4	4	4	.	.	.
Romania	1	1	2	.	2	.	.	.	.	4	5	5	5	5	3	4	3	4	.	4	3	3	.	3	4	3	2	5	5	5	3	5	5	5	5	5	4	4	2
Romania	1	1	2	.	2	.	.	.	.	5	5	5	5	5	5	5	4	5	5	5	.	.	.	3	5	5	5	5	5	5	5	5	5	4	5	5	6	6	1
Romania	2	1	2	41	2	5	5	4	4	5	5	5	5	5	5	5	5	5	5	5	5	5	5	4	5	5	4	5	5	5	5	5	5	5	5	5	5	4	3
Romania	1	2	2	.	2	.	.	.	.	4	4	4	5	5	4	4	.	4	.	4	.	.	.	3	4	4	4	5	5	5	5	5	5	5	5	4	2	2	1
Romania	1	1	2	.	2	1	1	1	1	2	.	4	1	4	1	1	1	1	1	3	1	1	1	1	1	1	1	1	1	1	1	1	1	1	1	1	5	5	5
Romania	1	1	2	.	2	.	.	.	.	5	4	4	4	4	1	2	2	3	2	2	.	.	.	1	1	1	1	5	5	5	5	5	5	5	5	5	4	1	1
Romania	1	1	2	.	2	4	4	4	4	5	5	5	5	5	5	5	.	5	4	4	4	5	4	2	3	3	4	5	5	5	5	5	5	5	5	5	6	5	1
Romania	1	2	2	.	2	4	.	4	4	5	.	5	5	5	4	4	5	5	4	.	.	.	.	1	3	4	1	5	5	1	5	5	5	3	5	3	5	4	1
Romania	1	1	2	.	2	3	3	3	.	4	4	5	3	5	4	4	4	3	4	4	4	4	.	2	4	5	3	5	5	5	5	5	5	5	5	5	6	3	1
Romania	1	1	2	.	2	3	3	.	.	5	4	4	4	5	3	2	.	3	3	5	3	.	.	3	2	2	2	5	5	2	2	5	3	3	3	.	4	3	1
Romania	1	2	2	.	2	.	.	.	.	5	5	5	5	5	5	5	5	5	.	5	.	5	.	4	5	5	4	5	5	5	5	5	5	5	5	5	5	5	3
Romania	1	1	2	.	2	.	.	.	.	4	2	3	4	4	4	4	.	4	2	3	2	.	.	3	4	5	5	5	5	4	5	5	4	4	4	4	4	4	2
Romania	1	1	2	.	1	.	.	1	.	5	5	5	5	5	4	4	5	5	4	3	.	.	.	1	2	2	5	5	5	5	5	5	5	5	5	5	6	4	1
Romania	1	1	2	.	2	.	4	.	.	5	4	5	5	5	4	4	3	5	4	5	.	3	.	1	2	1	1	5	5	5	5	5	5	.	5	4	4	2	1
Romania	1	1	2	.	3	2	2	2	2	5	1	1	2	2	1	1	1	1	1	1	1	1	.	5	5	5	5	5	5	5	5	5	5	5	5	5	4	1	1
Romania	2	1	2	26	2	.	.	.	.	5	4	5	5	5	3	3	3	4	4	4	3	3	3	2	4	4	4	5	5	5	5	5	5	5	5	5	3	4	2
Romania	1	1	2	.	2	4	.	4	5	5	5	5	5	5	5	5	5	5	5	5	5	5	5	5	5	5	5	5	5	5	5	5	5	5	5	5	4	4	3
Romania	1	1	2	.	2	4	4	4	4	5	5	5	5	5	4	4	4	4	4	4	3	4	4	3	5	4	4	4	4	4	4	4	4	4	4	4	5	4	1
Romania	1	1	2	.	2	3	.	.	.	5	3	3	3	4	2	2	.	3	.	.	.	.	.	1	2	2	1	5	5	4	5	5	4	4	5	3	6	4	1
Romania	1	1	2	.	2	.	.	.	.	4	4	4	5	5	4	4	3	4	.	4	3	.	.	1	4	1	2	5	5	5	5	5	5	5	5	5	4	3	1
Romania	1	1	2	.	2	3	3	.	.	5	1	3	3	5	3	4	4	3	4	5	.	4	.	3	3	4	4	5	5	5	5	4	4	5	5	5	6	1	1
Romania	1	1	2	.	2	.	.	.	.	5	5	5	5	5	4	4	4	4	4	4	4	4	4	2	2	3	1	5	5	5	5	5	5	5	5	5	4	4	1
Romania	1	1	2	.	2	.	.	.	.	5	4	4	4	5	2	2	.	4	3	3	.	.	.	3	2	3	3	5	5	5	5	5	5	4	5	4	4	3	1
Romania	1	1	2	.	2	3	2	3	2	5	3	3	5	4	4	4	4	4	3	3	.	4	.	1	3	4	4	1	4	3	5	5	4	3	4	4	4	2	1
Romania	1	1	2	.	2	.	.	.	.	4	3	.	4	5	4	4	.	4	3	.	.	.	.	3	2	4	1	5	5	5	4	5	5	5	5	4	4	4	1
Romania	1	1	2	.	2	4	4	5	5	5	4	.	5	5	5	5	.	3	4	.	.	4	4	4	5	2	3	5	5	5	5	4	5	5	4	5	4	4	1
Romania	1	1	2	.	2	3	3	3	3	5	2	5	4	4	3	3	.	3	3	3	.	.	.	3	5	5	4	5	5	5	5	3	3	5	5	5	6	1	1
Romania	1	1	1	.	2	1	1	1	1	5	5	5	5	5	1	1	1	1	1	1	.	1	1	3	5	4	3	5	5	5	5	5	5	4	4	4	.	.	.
Romania	1	1	2	.	2	.	.	.	.	4	2	2	2	2	1	1	1	1	2	3	3	1	.	1	1	1	5	5	3	5	5	5	5	5	5	3	6	1	1
Romania	1	1	2	.	2	.	.	.	.	5	4	4	4	5	5	4	.	5	4	4	.	.	.	4	5	5	4	5	5	5	5	5	4	5	5	4	4	4	1
Romania	1	1	2	.	2	4	3	2	2	5	4	4	4	5	4	4	4	4	3	5	4	5	4	2	4	4	3	5	5	5	5	5	5	5	5	5	5	4	4
Romania	1	1	1	.	2	2	4	.	.	4	1	2	4	2	4	4	5	2	2	3	3	3	3	1	4	4	2	5	5	5	5	5	5	5	5	5	6	6	1
Romania	1	1	2	.	2	.	.	.	.	5	5	5	5	5	5	5	5	5	.	5	5	5	5	.	5	5	4	5	5	5	5	5	5	5	5	4	6	4	1
Romania	1	1	2	.	2	.	.	.	.	5	4	5	4	5	4	3	.	4	.	4	.	.	.	3	3	3	4	5	5	5	5	5	5	4	5	3	4	3	1
Romania	1	1	2	.	2	.	.	4	4	5	5	4	4	5	3	3	3	3	3	3	3	3	3	3	3	3	3	5	5	5	5	4	4	3	3	3	4	3	1
Romania	1	1	2	.	2	.	4	.	4	5	5	4	5	5	4	4	4	3	.	.	4	4	.	4	5	5	2	1	5	5	5	4	5	5	5	5	6	3	1
Romania	1	2	1	.	2	3	4	3	3	5	5	4	5	5	4	4	.	4	.	4	.	.	3	3	4	4	3	5	4	4	5	5	5	5	5	5	3	3	1
Romania	1	2	2	26	2	.	.	.	.	5	5	.	5	4	4	.	4	4	2	5	.	.	.	3	2	4	3	5	3	5	5	5	5	5	5	1	4	4	1
Romania	2	1	2	.	2	.	.	.	.	4	3	3	4	5	4	.	.	4	4	5	.	.	.	3	5	4	3	5	5	5	5	4	4	5	5	5	4	3	3
Romania	1	1	2	.	2	.	.	.	.	5	4	5	5	5	4	4	4	5	4	5	2	4	.	3	5	5	5	5	4	5	5	5	5	5	5	4	6	5	3
Romania	1	1	2	.	2	4	4	4	4	5	5	4	5	5	4	4	4	4	4	5	4	4	.	5	5	4	4	1	4	1	1	5	3	4	5	3	6	4	3
Romania	1	1	2	.	2	4	4	4	4	5	5	5	5	5	4	4	4	4	4	4	4	4	4	3	3	3	4	5	5	5	.	5	5	5	5	5	5	1	1
Romania	.	.	.	.	.	.	.	.	.	5	5	5	4	5	4	4	4	5	4	.	.	5	.	3	5	4	3	5	5	5	5	5	5	5	5	4	4	4	1
Romania	1	1	2	.	2	.	.	.	.	5	4	5	5	5	3	4	2	4	4	5	.	4	.	1	2	1	1	5	5	5	5	4	5	4	4	4	4	4	2
Romania	1	2	2	35	2	.	.	.	.	5	4	5	5	5	4	4	.	4	4	4	4	4	4	3	4	4	3	5	4	1	1	5	2	4	5	2	4	3	1
Romania	1	2	2	26	2	.	.	.	.	4	4	3	3	4	3	.	.	3	2	3	.	.	.	2	5	4	3	5	5	5	5	5	5	5	5	5	4	2	1
Romania	1	1	2	.	2	2	2	3	2	5	4	4	4	5	4	3	4	3	3	4	.	.	.	4	4	2	5	5	3	5	5	3	4	3	4	3	4	4	1
Romania	1	1	2	.	2	3	3	2	2	3	4	4	3	5	3	3	3	2	3	3	3	4	3	2	3	2	1	5	5	5	5	2	3	3	4	3	3	2	1
Romania	1	1	2	.	2	.	.	4	.	5	4	3	4	4	3	3	.	4	3	4	.	.	.	1	2	4	4	5	5	3	3	4	4	5	5	5	4	4	1
Romania	1	2	2	24	2	.	.	.	.	5	5	5	5	5	5	5	5	4	4	4	4	4	.	2	5	5	4	5	5	5	5	5	5	5	5	5	3	3	1
Romania	1	2	2	37	1	.	.	.	.	5	5	4	5	5	5	5	4	4	.	5	4	4	3	1	5	5	4	5	5	5	4	5	5	5	5	5	4	2	1
Romania	1	2	2	.	2	4	4	4	4	4	4	4	5	5	4	4	4	4	4	4	3	4	4	1	4	4	3	5	5	5	5	5	5	4	5	5	3	3	1
Romania	1	1	2	.	2	.	.	.	.	4	3	4	4	5	5	5	3	4	.	4	4	3	3	4	5	4	4	5	4	5	5	4	5	5	5	4	4	4	2
Romania	2	1	2	.	2	.	.	.	.	5	3	5	5	5	3	3	4	5	4	4	4	4	.	3	4	4	1	4	4	3	2	5	4	3	4	4	2	2	1
Romania	1	1	2	.	2	.	.	.	.	5	5	5	5	5	4	2	.	4	4	4	3	3	3	2	4	2	1	5	5	5	5	5	5	5	5	4	4	2	2
Romania	1	1	2	.	2	4	.	4	.	5	4	4	4	5	4	4	4	4	4	3	4	4	.	1	4	3	2	5	5	5	4	4	4	4	4	4	5	4	3
Romania	1	2	2	.	2	.	.	.	.	4	.	.	4	5	3	.	.	4	.	4	.	.	.	4	5	5	.	5	5	5	5	5	5	5	5	5	3	2	1
Romania	1	1	2	.	2	.	.	.	.	5	4	4	2	5	2	2	.	2	2	4	.	.	.	1	2	1	1	3	3	3	3	5	4	4	5	4	4	2	1
Romania	1	1	2	.	2	.	4	4	4	5	4	5	5	5	4	4	4	4	4	5	3	4	3	1	1	1	1	5	5	5	5	4	4	4	4	4	6	3	1
Romania	1	1	2	.	2	5	5	.	.	5	5	5	5	5	5	5	5	5	5	5	5	5	.	.	5	5	4	5	5	5	5	5	4	4	5	4	4	4	4
Romania	1	1	2	.	2	4	.	4	.	5	4	4	4	5	4	4	.	4	2	2	.	3	1	1	3	4	3	5	5	5	5	3	3	5	5	2	6	4	4
Romania	1	1	2	.	2	.	.	.	.	5	5	5	4	5	4	4	.	5	.	5	3	4	.	5	5	5	4	5	5	5	5	5	5	4	5	4	6	5	2
Romania	1	2	2	.	2	.	.	.	.	4	2	5	5	5	5	.	3	5	.	5	.	.	.	1	5	5	5	5	1	5	5	5	5	5	5	1	6	4	2
Romania	1	1	2	.	2	.	.	.	.	5	4	5	5	5	4	4	2	4	4	4	.	.	.	3	4	4	5	5	5	5	5	5	5	5	5	5	4	4	2
Romania	1	1	2	.	2	1	.	2	.	5	2	3	4	4	1	3	.	2	3	3	.	.	2	1	1	1	1	5	3	3	5	5	5	5	5	5	5	2	2
Romania	1	1	2	.	2	.	.	.	.	5	4	4	5	4	4	4	.	4	1	3	.	.	.	1	4	3	3	5	5	5	5	5	5	5	5	5	6	4	1
Romania	1	1	2	.	1	.	.	.	.	.	3	.	1	2	1	1	1	2	.	3	.	.	.	4	4	3	4	5	5	3	3	5	5	2	5	1	5	1	1
Romania	1	1	2	.	2	3	3	3	3	5	5	5	5	5	5	5	4	5	3	5	4	5	3	5	5	5	5	5	5	5	5	5	5	5	5	4	6	3	1
Romania	1	1	2	.	2	5	.	.	.	5	4	2	4	4	4	4	3	4	5	.	.	.	.	4	5	4	4	5	5	5	5	5	5	4	5	3	4	3	1
Romania	1	1	4	.	2	4	4	4	4	4	4	5	4	4	3	3	3	3	3	3	3	3	3	3	3	3	3	5	5	5	5	5	3	3	4	3	3	2	1
Romania	1	1	2	.	2	.	.	.	.	5	4	5	5	5	4	4	4	5	.	.	.	5	.	3	4	.	.	5	5	5	5	5	5	5	5	4	4	4	1
Romania	1	1	2	.	2	.	.	.	.	5	4	5	5	5	5	5	.	5	4	4	.	.	.	3	5	5	4	5	5	5	5	5	5	5	5	5	6	6	3
Romania	1	1	1	.	1	.	.	.	.	4	4	4	4	5	2	4	.	4	.	.	.	.	.	2	2	2	2	5	5	5	5	4	4	4	5	4	4	2	1
Romania	1	2	2	28	1	.	.	.	.	4	4	4	4	4	2	2	2	3	2	3	3	3	3	2	2	4	2	5	5	5	5	5	5	5	5	5	4	4	1
Romania	1	1	2	23	2	.	.	.	.	5	3	2	4	2	1	1	1	3	.	.	.	.	.	1	2	3	3	5	4	5	5	5	5	5	5	5	2	2	1
Romania	1	1	2	.	2	4	2	2	4	5	2	4	5	2	4	4	.	2	2	4	.	.	.	3	5	5	4	5	4	4	4	5	5	4	5	4	3	2	1
Romania	1	1	2	.	2	2	2	2	2	5	5	5	3	5	4	4	3	5	4	5	3	3	3	4	5	2	2	4	3	3	3	4	4	4	4	4	4	4	1
Romania	1	1	2	.	1	.	.	.	.	5	2	3	4	5	3	2	.	4	2	.	.	.	.	2	4	5	5	5	5	5	1	5	5	5	5	5	5	3	2
Romania	1	2	2	.	2	.	3	3	3	5	5	5	.	5	4	4	.	5	2	3	.	.	.	1	3	4	3	5	5	5	5	5	5	5	5	4	4	4	1
Romania	1	1	2	.	2	3	3	3	3	5	5	5	5	5	4	4	3	4	4	4	4	4	3	1	4	3	4	5	5	5	5	5	5	4	5	3	4	3	1
Romania	1	1	2	.	2	3	.	.	.	5	5	5	4	5	5	5	5	5	5	5	5	5	5	4	5	5	4	5	5	5	1	5	4	5	5	5	6	5	2
Romania	1	1	2	.	2	.	.	.	.	3	4	3	4	5	4	3	3	4	3	3	.	.	.	3	4	4	5	5	5	5	5	4	4	5	5	3	5	2	2
Romania	1	1	2	.	2	5	.	5	.	5	4	5	4	5	4	4	4	5	5	4	.	4	.	2	4	4	3	5	5	4	5	5	5	5	5	5	4	3	1
Romania	1	2	2	.	2	.	.	.	.	4	2	.	5	5	5	.	.	5	.	5	.	.	.	2	5	4	2	2	4	2	2	5	5	5	5	4	2	2	1
Romania	1	1	2	.	2	.	3	3	3	4	5	3	3	5	3	3	3	4	.	.	.	.	.	5	5	4	4	5	4	5	5	5	4	5	5	4	6	2	1
Romania	1	1	2	.	2	.	.	.	.	5	5	5	5	5	5	5	5	5	5	4	.	.	.	3	5	5	5	5	5	4	5	5	5	5	5	5	4	4	1
Romania	1	1	2	.	2	.	.	.	.	4	4	4	4	5	2	4	4	4	3	.	3	4	3	3	4	2	3	5	5	5	5	5	4	4	5	3	4	3	1
Romania	1	1	2	.	2	.	.	.	.	5	4	5	5	5	4	5	.	5	5	5	4	.	.	3	4	4	2	5	5	5	5	5	5	5	5	4	4	4	1
Romania	1	1	2	.	1	.	.	.	.	5	5	4	5	5	5	5	4	5	4	.	.	4	.	1	5	5	5	5	5	5	5	5	5	5	5	5	4	4	1
Romania	1	1	2	.	2	.	.	.	.	5	4	4	3	4	5	5	5	4	2	4	3	.	.	2	5	5	3	5	5	5	5	5	5	5	5	5	4	4	1
Romania	1	1	2	.	2	5	5	.	.	5	5	5	5	5	4	4	4	4	4	4	.	4	4	4	5	5	5	5	5	5	5	5	5	5	5	5	2	2	1
Romania	1	2	2	23	2	.	.	.	.	5	5	4	2	4	4	.	5	4	.	4	.	5	.	.	5	4	3	5	4	5	5	5	5	5	5	5	3	3	1
Romania	1	1	2	.	2	.	2	.	.	4	2	4	5	5	3	4	3	4	4	4	3	4	.	2	4	4	3	5	5	5	5	5	5	5	5	4	6	4	2
Romania	1	1	2	.	2	4	3	2	2	4	4	4	2	5	4	4	3	4	2	3	.	.	.	3	4	4	3	5	5	5	5	5	5	5	5	4	4	3	1
Romania	1	1	2	.	2	.	.	.	.	5	2	4	5	5	2	2	4	5	4	.	.	.	.	3	4	4	2	5	5	5	5	5	5	5	5	5	1	2	1
Romania	1	1	2	.	2	.	.	.	4	5	4	4	5	5	4	4	3	4	3	4	.	.	.	2	4	4	4	5	5	2	4	5	5	5	5	5	4	4	1
Romania	1	1	2	.	2	4	4	4	4	4	5	5	5	3	4	4	3	4	4	4	2	5	3	3	5	4	5	5	5	5	5	5	5	5	5	5	6	3	1
Romania	1	1	2	.	2	3	3	3	3	4	5	3	4	4	4	4	3	2	2	2	3	3	3	2	4	3	2	5	4	5	1	5	5	5	5	4	4	2	1
Romania	1	1	2	.	2	.	.	.	.	5	1	1	5	5	1	1	1	4	1	1	1	1	1	1	1	1	4	4	3	1	4	4	5	1	5	2	4	3	1
Romania	1	1	2	.	2	4	3	3	.	4	4	3	4	4	4	3	3	4	3	5	3	4	4	2	3	3	4	5	4	4	4	5	5	5	5	5	3	2	1
Romania	1	1	2	.	2	.	3	.	.	5	4	5	5	5	4	3	5	5	.	3	.	5	.	1	2	3	1	1	1	1	1	5	5	5	5	4	6	4	1
Romania	1	2	2	.	2	.	.	.	.	4	2	2	5	5	4	4	4	4	5	5	.	.	.	3	5	5	5	5	5	5	5	5	5	5	5	4	2	2	1
Romania	1	2	2	.	2	.	.	.	.	.	4	5	5	5	5	5	5	5	.	5	5	5	.	5	5	5	5	5	5	5	5	5	5	5	5	5	6	4	2
Romania	1	1	1	.	2	.	4	.	.	5	4	5	4	5	5	5	5	5	3	4	.	5	.	1	3	4	3	5	5	5	5	5	5	5	5	5	4	4	1
Romania	1	1	2	.	2	.	.	.	.	5	2	5	4	5	2	2	4	4	.	2	.	.	.	2	1	2	1	5	4	4	5	5	5	4	5	4	5	4	1
Romania	1	1	2	.	2	.	.	.	.	5	4	4	5	4	4	4	4	4	4	4	.	5	.	5	4	4	2	5	5	5	5	5	5	5	5	5	4	3	1
Romania	1	2	2	.	2	4	4	4	4	3	4	5	5	5	5	5	4	5	4	3	.	4	.	4	5	5	5	3	3	4	5	5	5	5	5	3	4	3	1
Romania	1	1	2	.	2	.	.	.	.	5	5	5	5	5	5	5	.	5	.	5	.	.	.	3	4	4	3	5	5	5	5	5	5	5	5	5	3	3	1
Romania	1	1	2	.	2	3	3	.	3	5	5	5	5	5	4	4	4	5	3	5	.	.	.	2	3	2	2	5	5	5	5	5	5	5	5	3	6	4	2
Romania	1	1	4	.	2	.	.	.	.	5	4	5	5	4	4	2	4	4	1	3	3	4	3	2	2	4	4	5	5	5	5	5	5	5	5	5	5	3	3
Romania	1	1	2	.	2	.	.	.	.	5	2	4	4	4	2	2	3	2	4	3	3	4	.	3	4	4	2	5	5	5	5	4	5	3	5	4	6	2	1
Romania	1	1	2	.	2	.	.	.	.	4	3	4	5	.	3	3	3	1	2	1	.	1	.	5	5	.	.	5	5	5	5	5	5	5	5	4	2	2	1
Romania	1	1	2	.	2	2	1	1	1	5	5	5	5	5	5	5	5	5	5	5	5	5	5	5	5	5	5	5	3	5	5	4	4	4	4	4	.	.	.
Romania	1	1	2	.	2	4	4	4	4	5	5	5	5	5	5	5	5	5	5	5	5	5	5	1	4	2	2	5	5	5	5	5	5	5	5	5	4	3	1
Romania	1	2	4	52	2	4	2	2	2	4	4	1	4	4	4	5	4	4	1	3	2	4	.	1	2	4	4	5	5	5	3	5	5	5	5	5	5	4	1
Romania	1	2	4	.	2	.	.	.	.	5	5	.	5	4	3	3	4	4	5	.	.	.	.	3	4	4	4	5	5	1	5	5	5	5	5	5	5	4	1
Romania	1	2	2	23	2	.	.	.	.	5	5	5	5	5	5	5	5	5	.	5	.	5	.	4	5	5	5	5	5	5	5	5	5	5	5	5	3	3	2
Romania	1	1	2	.	2	.	3	.	.	5	3	4	5	5	4	.	.	4	.	4	.	.	.	3	3	5	3	5	5	5	1	5	5	5	5	5	4	4	1
Romania	1	2	2	23	2	4	4	4	4	3	3	3	3	5	4	4	4	4	3	5	3	3	3	3	5	5	3	5	5	5	5	5	5	4	5	4	4	3	1
Romania	1	2	2	26	2	.	.	.	.	4	2	5	5	5	5	.	.	4	.	5	.	3	.	3	3	4	2	5	5	5	5	5	5	4	5	4	2	4	1
Romania	1	2	2	.	2	3	.	.	.	2	4	3	3	3	3	.	.	3	.	.	3	.	.	3	3	3	3	5	5	5	5	5	5	4	5	3	4	2	1
Romania	1	2	2	23	2	2	2	2	2	3	2	3	3	3	2	1	2	2	1	2	3	3	1	1	3	3	3	5	5	3	3	3	3	3	3	3	3	3	1
Romania	2	1	2	50	2	.	.	.	.	3	1	3	4	4	2	.	4	2	.	5	.	.	.	3	4	5	.	5	5	5	5	5	.	5	5	5	3	2	1
Romania	1	1	2	.	2	.	.	.	.	5	3	4	4	5	4	3	4	4	5	.	.	5	.	3	5	5	5	5	5	5	5	5	5	5	5	5	2	2	1
Romania	1	1	2	24	2	.	.	.	.	5	5	5	5	5	5	5	5	5	5	5	.	5	.	5	5	5	5	5	4	5	5	5	5	5	5	4	6	5	1
Romania	1	1	2	.	2	.	.	.	.	4	4	5	5	5	4	3	4	4	4	4	3	4	.	2	4	2	4	5	5	5	5	5	5	5	5	4	3	2	2
Romania	1	1	2	.	2	.	.	.	.	5	4	4	4	5	4	4	.	3	.	5	.	.	.	1	4	3	4	5	5	5	5	5	5	5	5	3	4	1	1
Romania	1	1	2	.	2	3	3	3	3	4	4	3	2	2	.	3	2	1	3	3	4	3	.	4	4	4	3	5	4	5	5	5	5	4	4	4	5	2	1
Romania	1	1	2	.	2	5	.	5	.	5	5	4	3	5	4	4	4	5	3	4	3	3	3	5	5	5	4	5	5	5	5	5	5	5	5	5	4	4	2
Romania	1	1	2	.	1	.	2	.	2	5	4	4	5	5	2	2	2	2	1	4	2	2	1	1	1	1	1	5	5	3	5	4	4	4	5	5	3	2	1
Romania	1	1	3	.	1	3	.	3	.	5	4	5	5	3	4	2	3	.	1	2	.	.	.	3	4	2	3	5	4	5	5	5	5	5	5	5	.	5	1
Romania	1	1	4	.	2	.	.	.	.	4	5	3	5	4	1	4	3	3	1	4	.	4	.	1	3	4	3	5	5	5	3	5	5	5	5	4	4	3	3
Romania	1	1	2	.	2	4	4	4	3	5	4	4	5	5	5	5	.	4	.	4	.	.	.	2	3	4	3	5	5	5	5	5	4	4	5	5	4	1	1
Romania	1	2	2	24	2	3	3	3	3	4	4	5	4	4	3	3	3	4	4	4	4	4	4	3	3	3	3	4	4	3	4	3	3	3	3	3	5	5	5
Romania	1	2	2	.	2	.	.	.	.	4	4	4	5	4	4	4	.	4	4	5	.	.	.	1	4	2	4	5	5	5	5	4	5	5	5	5	3	2	2
Romania	1	1	2	.	2	.	.	.	.	4	4	2	4	5	2	2	1	2	3	4	.	2	3	1	4	4	4	5	5	5	5	5	5	4	5	4	2	3	2
Romania	1	1	2	.	2	.	4	4	4	5	4	4	4	5	2	2	.	4	.	4	.	4	4	3	4	4	4	5	5	5	5	5	5	5	5	5	6	4	1
Romania	1	1	2	.	2	2	.	3	.	5	3	5	4	5	2	2	3	4	4	4	2	4	3	2	2	4	2	5	5	4	5	5	5	4	5	3	3	4	2
Romania	1	2	2	.	2	.	.	.	.	5	4	5	5	5	5	5	.	4	.	4	.	.	.	3	4	4	3	5	5	5	5	5	5	4	5	4	4	3	1
Romania	1	2	2	.	2	.	.	.	.	4	3	1	4	4	1	.	.	3	.	.	.	.	.	1	1	1	2	5	5	5	5	5	5	5	5	5	4	2	1
Romania	1	1	1	.	2	.	.	.	.	4	2	.	5	5	4	4	4	5	.	.	.	4	.	4	5	4	4	5	5	5	5	5	5	5	5	5	4	4	2
Romania	1	1	2	.	3	.	.	.	.	5	3	4	4	5	4	4	4	4	3	4	.	4	.	2	3	4	4	5	4	4	4	4	4	4	4	3	4	4	1
Romania	1	2	2	.	2	.	.	.	.	2	1	3	4	4	4	4	3	2	4	4	.	.	.	2	4	4	4	5	5	5	5	5	5	5	5	5	4	2	1
Romania	1	2	2	43	2	.	.	.	.	5	3	3	4	5	4	2	2	3	2	4	.	.	.	1	1	3	1	3	3	3	3	5	4	2	4	2	4	1	1
Romania	1	2	2	.	2	4	4	.	.	5	4	5	5	5	4	.	4	4	.	4	4	.	.	3	4	5	5	5	5	5	5	5	5	5	5	5	4	4	1
Romania	2	1	2	42	2	4	4	4	4	4	4	5	5	5	4	4	4	4	5	.	.	4	.	4	.	.	.	5	5	5	5	5	5	5	5	5	3	2	2
Romania	1	2	2	.	2	4	4	4	4	5	4	5	5	5	4	4	4	4	3	3	3	3	3	4	4	3	3	2	3	3	3	3	4	4	4	4	4	4	4
Romania	1	1	2	.	2	.	.	.	.	4	5	4	5	5	3	4	4	2	.	5	2	4	.	2	5	4	4	5	5	4	5	4	4	5	5	4	3	1	1
Romania	1	1	2	.	2	.	.	.	.	4	4	1	4	4	4	4	.	2	.	3	.	1	.	4	5	2	4	5	5	5	5	5	5	4	5	4	5	3	1
Romania	2	1	2	.	2	.	.	.	.	5	.	.	5	5	4	.	3	4	4	4	.	.	.	3	4	4	4	5	5	5	5	5	5	5	5	5	4	2	1
Romania	1	2	2	23	2	.	.	.	.	4	5	5	5	5	4	.	.	4	.	4	.	.	.	3	5	5	5	5	5	5	5	5	5	5	5	5	5	3	1
Romania	1	2	2	23	2	4	.	.	.	3	3	3	3	4	2	2	2	3	2	4	.	.	.	3	4	3	4	5	5	5	5	5	5	5	5	5	5	2	1
Romania	1	2	2	24	2	.	.	.	.	5	5	5	4	5	3	3	4	4	.	3	3	5	1	2	2	4	3	5	5	5	5	5	5	5	5	4	2	2	1
Romania	1	2	2	23	1	.	.	.	.	5	4	5	5	5	5	5	5	5	.	5	.	5	.	3	5	5	3	5	5	5	5	5	5	5	5	5	3	4	2
Romania	1	1	2	.	2	.	.	.	.	4	5	5	5	4	4	4	3	5	3	4	.	.	.	5	4	3	2	3	4	5	5	4	3	5	5	4	3	3	1
Romania	1	2	2	.	2	1	1	1	1	5	2	4	4	1	1	1	1	2	1	4	1	.	.	1	4	4	4	4	3	4	4	5	5	1	5	4	4	3	2
Romania	1	2	2	23	2	.	.	.	.	5	4	4	5	5	4	4	4	4	.	5	.	4	.	1	4	4	4	5	4	5	5	5	5	4	5	4	2	2	2
Romania	1	2	2	40	1	.	.	.	.	5	5	4	.	5	5	.	.	5	.	5	.	.	.	3	5	5	3	5	4	5	5	5	5	5	5	5	4	4	1
Romania	1	2	2	.	2	.	.	.	.	5	5	5	4	5	5	5	.	4	3	5	.	.	.	1	4	2	2	5	5	5	5	5	4	4	5	4	5	1	1
Romania	1	2	2	.	2	4	4	.	.	5	5	5	5	5	4	.	4	.	.	.	.	.	.	3	4	4	4	4	4	4	4	4	4	4	4	4	4	3	3
Romania	1	2	2	23	2	.	.	.	.	4	3	2	2	3	2	.	.	4	2	3	2	.	3	2	2	3	2	5	5	5	5	4	5	5	5	3	5	4	1
Romania	1	2	2	23	2	.	.	.	.	4	5	5	5	3	5	.	.	5	.	.	.	.	.	2	4	2	1	5	2	2	5	5	5	4	5	3	5	3	1
Romania	1	2	2	26	2	.	.	.	.	5	4	4	4	5	2	2	1	4	.	5	2	.	.	1	5	1	1	5	5	5	5	5	5	5	5	5	4	4	2
Romania	1	1	2	.	2	.	.	.	.	5	2	4	1	5	2	2	.	3	.	4	.	.	.	1	2	1	4	5	5	5	5	5	5	5	5	5	.	.	.
Romania	1	2	2	.	2	.	.	.	.	5	5	5	5	5	5	5	5	1	1	1	.	1	.	2	5	4	4	4	5	5	5	5	5	5	5	5	4	4	2
Romania	1	2	2	23	2	.	.	.	.	4	4	5	5	5	3	.	.	5	.	5	4	5	.	3	3	3	3	5	4	1	5	4	4	4	5	4	3	3	3
Romania	1	2	2	24	2	.	.	.	.	5	5	5	5	5	1	.	5	1	.	1	.	1	.	5	5	5	3	5	5	5	5	5	5	5	5	5	2	3	1
Romania	1	2	2	23	2	.	4	.	.	4	4	4	.	5	4	.	.	4	4	.	.	.	.	3	4	4	4	5	5	5	5	5	5	3	5	5	2	1	1
Romania	1	1	2	.	2	.	.	.	.	5	2	4	4	5	2	4	3	4	.	3	.	3	.	2	4	2	1	5	3	5	3	4	4	4	4	2	1	2	1
Romania	1	2	2	23	2	.	.	.	.	3	5	5	5	5	5	5	5	5	5	5	.	5	.	3	5	5	5	5	5	5	5	5	5	4	5	4	4	4	2
Romania	1	1	2	.	2	.	.	.	.	5	3	5	4	5	3	4	4	4	3	1	.	3	4	1	3	4	4	4	4	4	4	4	4	5	5	4	5	3	1
Romania	1	1	2	.	2	.	.	.	.	4	5	5	4	5	4	4	.	5	.	.	4	.	.	1	2	1	1	5	5	5	5	5	5	5	5	5	6	4	1
Romania	1	1	1	.	2	1	.	.	.	1	2	1	2	4	1	1	2	3	2	4	.	4	.	1	2	2	2	4	4	5	5	4	5	4	5	4	6	4	2
Romania	1	1	2	.	2	.	.	.	.	5	3	4	3	5	2	2	4	4	3	4	3	3	3	2	3	1	2	5	5	5	5	4	4	5	4	4	.	.	.
Romania	1	1	2	.	2	.	.	.	.	5	5	5	5	5	5	4	5	5	5	.	.	5	5	5	5	5	5	5	4	5	5	5	5	5	5	5	5	4	4
Romania	1	1	2	.	1	2	1	.	.	5	4	4	3	4	4	3	4	4	.	.	.	.	.	1	4	3	3	5	5	5	5	5	5	5	5	4	4	4	1
Romania	1	2	2	24	2	.	.	.	.	5	4	3	4	2	2	.	.	3	3	4	3	3	3	2	2	4	4	5	5	5	5	5	5	5	5	4	3	1	1
Romania	1	1	2	.	2	4	4	4	4	4	4	4	4	3	3	3	3	3	3	3	3	3	3	2	5	2	4	5	4	5	5	5	5	5	5	4	6	6	2
Romania	1	1	2	.	2	.	.	.	.	4	4	4	3	4	3	3	.	3	.	3	3	.	3	3	3	4	4	5	5	5	5	4	5	5	5	5	6	5	1
Romania	1	1	2	.	2	3	.	3	.	4	3	4	5	5	4	4	3	4	.	1	4	4	.	1	4	2	1	5	5	3	5	5	4	5	5	3	.	.	.
Romania	1	1	2	.	2	4	4	4	4	5	5	4	2	5	3	3	4	3	4	.	.	5	4	3	3	.	.	5	5	5	5	5	5	5	5	5	4	4	1
Romania	1	2	2	35	1	.	.	.	.	4	4	5	5	5	5	5	4	5	4	5	2	5	4	5	5	5	5	4	4	4	4	5	5	5	5	5	4	4	2
Romania	1	2	1	23	2	.	.	.	.	5	3	4	4	5	3	3	3	3	4	4	.	.	.	.	4	3	3	5	5	5	5	5	5	4	5	4	4	3	2
Romania	1	1	2	.	2	.	.	.	.	5	5	4	5	5	4	4	4	4	3	4	4	3	4	5	5	5	5	5	5	5	5	4	4	4	5	4	4	3	1
Romania	1	1	2	.	2	2	1	.	.	4	4	4	5	5	4	3	3	4	3	4	2	4	2	4	4	3	3	5	4	5	5	5	5	5	5	3	6	5	1
Romania	1	1	2	.	2	.	2	.	2	2	4	4	5	4	4	4	.	3	.	3	.	.	.	4	5	5	4	5	4	5	4	5	5	5	5	3	3	2	1
Romania	2	1	2	28	2	.	.	.	.	5	3	4	5	5	4	4	3	4	4	5	.	3	.	2	1	4	3	5	4	4	5	4	4	3	5	4	2	4	1
Romania	2	1	2	48	2	.	.	.	.	4	4	4	4	4	4	.	.	4	4	4	.	.	.	3	4	4	3	5	5	5	5	4	4	5	5	5	4	3	2
Romania	1	1	2	.	2	4	4	4	4	5	2	4	4	4	4	3	.	4	2	3	.	.	.	2	3	3	1	5	5	2	5	4	4	5	5	4	4	4	1
Romania	1	2	2	24	2	.	.	.	.	5	4	2	3	5	5	5	5	4	.	5	.	4	.	5	5	5	.	5	5	5	5	5	5	5	5	5	2	3	1
Romania	1	1	2	.	2	.	.	1	.	5	5	2	1	2	1	1	.	2	4	1	.	.	.	1	1	1	1	5	5	5	5	5	5	5	5	1	4	2	1
Romania	1	1	1	.	2	.	.	4	.	5	5	5	4	5	5	4	4	4	4	3	4	3	3	5	5	4	4	5	4	5	5	5	4	5	5	4	4	4	2
Romania	1	1	1	.	2	2	1	2	2	2	5	3	2	5	.	4	4	3	3	.	3	4	4	1	2	4	1	5	5	2	5	4	5	5	5	4	2	2	1
Romania	1	2	2	23	2	.	.	.	.	5	5	5	5	5	5	.	5	5	4	5	.	.	5	3	5	4	4	5	5	5	5	5	5	5	5	5	4	4	1
Romania	2	1	2	45	2	.	.	.	.	5	5	5	5	5	5	.	.	5	4	5	4	.	.	2	4	4	1	5	5	5	5	5	5	5	5	4	3	2	2
Romania	1	1	2	.	2	3	3	3	3	3	3	3	3	3	3	3	3	3	3	3	3	3	3	3	3	3	3	5	4	4	3	3	3	3	3	3	4	4	4
Romania	2	1	2	35	2	.	.	.	.	5	2	5	4	5	4	4	3	4	4	5	.	.	.	3	5	5	4	5	5	5	5	5	5	5	5	5	1	1	1
Romania	1	1	2	.	2	.	.	.	.	5	5	5	5	5	5	5	.	5	.	5	.	.	.	1	5	5	5	5	5	5	.	.	5	5	5	5	4	2	1
Romania	1	2	2	.	2	.	.	.	.	5	4	5	5	5	4	4	.	4	.	3	.	.	.	4	5	5	4	5	5	5	5	5	4	5	5	5	4	1	1
Romania	1	2	2	42	2	.	.	.	.	5	5	5	5	5	5	5	5	5	5	5	.	5	5	4	5	5	5	5	5	5	5	5	5	5	5	5	4	4	4
Romania	1	1	2	.	2	.	.	.	.	5	2	5	4	4	3	3	.	4	2	5	.	.	.	1	2	2	2	5	5	4	5	5	5	4	5	2	6	4	4
Romania	1	2	.	23	2	.	.	.	.	2	1	1	3	4	4	4	.	4	4	5	.	.	.	4	5	5	5	5	5	5	5	5	5	5	5	5	4	3	1
Romania	1	2	2	41	2	4	3	.	.	4	4	4	4	4	3	2	3	3	3	4	3	3	3	3	4	4	4	4	2	4	3	4	4	2	5	3	2	3	3
Romania	1	1	2	.	2	.	.	.	.	3	4	4	5	5	4	5	.	.	5	5	2	3	2	3	4	4	3	5	5	5	4	5	5	5	5	4	4	5	2
Romania	1	1	1	.	2	.	.	.	.	5	5	4	5	4	4	1	4	4	4	4	.	.	.	4	5	4	4	5	5	5	5	5	5	5	5	4	5	4	1
Romania	1	2	2	26	2	.	.	.	.	5	4	5	5	5	4	.	3	4	.	4	.	.	.	3	5	5	5	4	5	5	5	5	5	5	5	5	4	3	1
Romania	2	1	2	35	2	.	.	.	.	.	.	.	.	5	2	2	2	3	3	3	3	3	3	2	2	4	2	5	3	2	5	5	5	4	5	5	2	2	1
Romania	2	1	2	.	2	.	.	.	.	4	3	4	4	5	4	.	.	5	.	5	.	.	.	3	4	4	4	5	1	5	5	5	5	5	5	5	4	4	4
Romania	1	1	2	.	2	.	.	.	.	5	2	4	5	5	3	3	4	4	4	4	2	4	.	1	2	4	2	5	5	1	5	5	5	5	5	3	4	3	1
Romania	1	2	2	.	2	.	.	.	.	5	5	5	5	5	5	.	.	5	5	5	.	.	.	3	5	5	5	5	5	5	5	5	5	5	5	5	3	4	1
Romania	1	1	2	.	2	3	.	3	3	5	2	5	5	2	4	4	4	3	4	3	.	.	.	4	4	4	2	5	5	5	5	5	5	5	4	4	6	5	2
Romania	1	2	2	.	2	.	.	.	.	5	2	4	4	5	4	4	.	3	4	3	.	.	.	3	5	5	4	5	5	5	5	5	5	5	5	5	4	2	1
Romania	1	2	2	49	2	.	.	.	.	4	5	5	.	5	1	1	1	5	5	5	.	5	.	2	4	4	4	3	3	2	1	4	4	4	4	3	2	2	1
Romania	1	1	2	.	2	2	2	1	1	5	3	4	3	5	4	4	4	4	4	3	4	3	3	5	4	3	3	5	5	5	5	5	.	5	5	5	4	4	1
Romania	1	1	2	.	2	2	2	2	2	5	1	2	2	3	1	1	1	2	2	3	2	3	3	1	2	3	1	5	4	4	4	4	4	4	5	5	6	4	2
Romania	2	1	2	46	2	.	.	.	.	5	4	4	4	4	3	3	3	3	4	4	3	3	3	1	4	5	3	5	5	5	5	4	4	4	4	5	4	2	3
Romania	1	1	3	.	2	2	.	2	.	2	1	4	4	5	4	1	2	3	.	.	.	2	2	3	2	2	1	5	5	5	5	5	5	5	5	5	4	2	1
Romania	1	1	2	.	2	.	.	.	.	5	4	5	4	5	3	4	5	4	.	4	.	5	.	2	4	3	3	5	5	5	5	5	5	5	5	4	2	4	1
Romania	1	1	2	.	2	5	.	5	.	5	5	4	5	5	5	5	5	4	3	4	.	5	.	5	5	5	5	5	5	5	5	5	5	5	5	4	4	5	2
Romania	1	1	2	.	2	4	3	5	5	4	4	4	4	4	5	5	.	4	5	4	.	5	3	5	5	5	5	5	5	5	5	5	5	5	5	5	3	1	1
Romania	1	2	3	.	1	2	2	3	3	3	4	3	2	3	3	3	3	3	4	4	3	4	4	3	3	3	4	4	4	4	4	4	5	5	5	5	3	2	2
Romania	1	1	3	35	1	.	.	.	.	3	3	4	5	5	4	4	4	3	3	2	2	2	2	4	5	5	5	5	5	5	5	4	3	5	5	4	1	1	1
Romania	1	1	2	.	2	5	2	5	.	2	2	4	4	5	4	4	.	4	.	4	.	5	.	1	3	4	3	5	5	5	5	5	5	5	5	5	6	2	1
Romania	1	3	2	36	1	5	5	.	.	5	4	4	4	5	5	4	5	4	3	4	2	4	5	4	3	4	5	5	.	5	5	5	5	4	4	5	1	1	1
Romania	1	1	1	20	2	.	.	.	.	5	5	5	5	5	5	5	5	3	3	3	.	4	3	3	4	5	5	5	5	5	5	4	4	4	5	4	5	3	1
Romania	1	1	1	36	2	3	.	.	.	3	1	1	1	2	1	1	.	1	1	.	1	.	1	1	1	3	3	3	3	3	3	5	5	4	4	2	4	2	2
Romania	1	1	1	20	2	2	2	.	.	5	2	2	4	4	2	2	.	1	.	.	.	4	.	1	1	4	1	5	5	5	5	5	5	5	5	5	4	1	1
Romania	1	1	1	20	2	3	3	3	3	2	2	2	2	4	3	2	4	4	3	3	3	4	3	1	3	3	3	5	3	4	3	3	3	3	4	2	3	2	1
Romania	1	1	1	20	2	.	.	.	.	5	1	3	4	5	4	3	3	4	.	.	.	3	.	2	3	3	1	5	5	5	5	5	5	4	5	5	6	4	1
Romania	1	1	2	20	2	1	1	1	4	5	5	5	5	5	5	5	4	4	5	5	5	5	5	3	5	5	5	5	5	5	5	3	4	5	4	3	6	6	4
Romania	1	.	4	18	2	5	5	5	5	5	4	5	5	5	5	5	5	5	5	5	.	5	5	4	4	4	4	5	5	5	5	5	5	5	5	5	6	4	1
Romania	1	1	1	18	2	.	1	.	1	4	2	4	1	1	2	1	3	2	.	1	.	2	.	1	3	1	1	5	5	5	5	3	3	4	4	4	4	3	1
Romania	1	.	4	19	2	.	.	.	.	5	5	5	5	5	5	5	5	5	5	5	5	5	5	5	5	5	5	5	5	5	5	5	5	5	5	5	6	6	2
Romania	1	1	3	18	1	.	.	.	.	4	3	4	5	4	5	.	.	4	3	3	3	3	3	3	4	4	4	5	5	5	5	5	5	5	5	5	6	4	2
Romania	1	1	4	18	2	.	.	.	.	5	5	5	3	.	3	3	3	4	.	.	.	.	.	1	3	3	1	5	5	5	5	4	4	3	4	3	4	3	1
Romania	1	1	4	18	2	.	.	.	.	5	5	5	5	4	5	.	.	5	.	.	.	.	.	1	2	1	1	5	5	5	5	5	5	5	5	5	4	5	1
Romania	1	1	3	19	1	3	3	3	.	4	3	3	4	3	4	3	4	3	4	3	3	.	.	2	4	3	4	5	5	5	5	5	5	5	5	4	6	4	1
Romania	1	1	4	18	1	5	.	5	.	4	3	4	4	5	4	4	3	4	4	.	3	4	5	3	4	5	2	5	5	5	5	5	5	5	5	5	4	4	2
Romania	1	1	4	18	2	.	.	.	.	5	5	5	5	5	5	.	.	4	.	.	.	.	.	1	4	2	2	5	5	5	5	5	5	5	5	5	4	4	.
Romania	1	1	3	18	2	3	4	.	.	3	4	.	.	.	.	.	.	.	.	.	.	.	.	3	4	4	3	5	5	5	5	5	5	5	4	4	1	3	1
Romania	1	1	4	18	1	3	3	3	3	3	3	4	5	3	4	4	4	4	4	4	4	4	3	2	4	3	4	5	5	5	5	5	4	4	4	4	3	2	1
Romania	1	2	2	22	2	.	.	.	.	5	3	3	4	2	4	4	.	4	2	.	3	4	4	4	5	5	5	5	5	5	5	5	5	5	5	4	1	1	1
Romania	1	.	.	18	1	2	2	1	1	1	1	1	2	2	1	1	1	1	1	2	2	2	2	2	2	2	2	2	2	2	2	2	2	2	1	3	2	3	3
Romania	1	2	2	24	2	.	.	.	.	2	1	2	3	2	3	.	.	4	.	.	.	.	.	2	2	4	4	5	5	5	5	5	4	3	5	5	4	3	1
Romania	1	2	2	23	2	.	.	.	.	4	3	4	2	4	4	.	.	4	2	3	.	3	3	3	4	4	3	5	4	5	5	5	5	4	5	3	3	3	3
Romania	1	1	2	25	1	3	4	.	.	5	4	5	4	5	4	4	4	5	4	2	4	4	2	2	4	4	4	5	5	5	5	4	4	5	5	4	6	5	2
Romania	1	1	3	19	2	3	4	3	4	4	4	4	5	5	4	4	4	4	4	4	4	4	4	3	4	4	4	4	4	4	4	4	4	3	3	3	5	2	2
Romania	1	1	4	19	1	3	4	3	4	3	4	5	4	5	4	4	4	4	3	4	3	4	3	3	4	4	4	5	5	5	5	5	4	5	5	5	4	2	2
Romania	1	1	3	20	1	2	3	3	3	3	3	3	3	3	3	3	2	3	3	3	3	3	3	3	3	3	3	5	5	3	3	3	3	3	3	3	4	4	2
Romania	1	1	3	26	1	4	.	4	.	3	4	4	3	4	4	.	4	4	4	4	.	.	4	3	4	4	3	5	5	5	5	5	5	4	4	4	6	3	2
Romania	1	1	3	19	1	3	4	3	.	3	3	4	4	4	4	3	4	4	4	4	.	3	4	2	3	2	2	5	5	4	2	4	4	4	4	4	3	4	2
Romania	1	1	3	25	1	4	4	4	4	4	4	3	4	5	5	4	4	4	5	4	3	4	4	4	5	4	4	5	5	5	5	4	4	4	4	4	6	4	4
Romania	1	1	3	49	1	5	4	4	4	5	3	5	4	5	5	5	.	5	5	.	.	.	.	3	4	4	4	5	5	5	3	5	5	5	5	5	2	3	2
Romania	1	1	1	21	2	.	1	.	.	5	5	5	5	5	5	5	5	5	5	4	3	5	.	4	5	5	5	5	5	5	5	5	5	5	5	4	6	6	1
Romania	1	1	1	23	2	4	2	3	2	4	2	3	1	2	2	2	1	2	.	.	.	1	.	2	3	2	2	5	4	5	5	4	4	3	4	3	6	3	2
Romania	1	1	1	20	2	4	.	3	3	4	2	.	4	4	3	3	.	3	.	.	1	.	.	3	2	3	3	5	5	5	5	3	2	4	4	3	4	3	1
Romania	1	1	2	21	1	2	2	.	.	5	4	4	4	4	3	1	4	4	4	.	.	2	2	1	4	4	4	5	5	5	5	5	5	5	5	5	2	2	1
Romania	1	1	3	19	2	.	.	.	.	4	4	4	3	5	4	3	3	4	2	3	3	4	3	4	3	4	4	5	5	5	5	4	4	4	4	4	2	1	1
Romania	1	2	3	23	2	3	3	3	3	4	3	4	5	5	4	3	4	3	4	4	3	5	4	3	3	3	3	5	5	5	5	5	5	5	5	5	5	3	4
Romania	1	2	2	23	1	4	4	4	4	4	4	4	4	4	4	4	4	4	4	4	4	4	4	4	4	4	4	5	5	5	1	5	5	5	5	5	.	.	.
Romania	1	1	3	21	2	5	4	5	4	5	5	4	4	4	4	4	4	5	4	.	.	.	.	2	4	3	4	5	5	5	5	4	4	5	5	3	4	3	1
Romania	1	1	2	23	2	.	.	.	.	5	2	2	3	4	4	2	2	2	3	3	1	2	1	2	4	2	2	5	5	5	5	5	4	4	4	4	4	3	1
Romania	1	2	2	22	1	.	.	.	.	5	5	4	5	4	5	.	.	5	.	.	.	.	.	4	5	4	4	5	5	5	5	5	5	5	5	5	4	3	1
Romania	1	1	2	22	2	.	4	.	.	4	4	4	5	3	3	.	.	.	4	.	3	.	.	3	2	2	5	5	5	4	5	5	5	5	5	3	4	2	1
Romania	1	1	3	22	2	3	3	4	4	2	4	4	4	4	4	3	4	4	2	3	4	4	4	4	2	3	2	5	3	3	3	4	4	4	4	4	5	5	4
Romania	1	1	3	22	2	.	.	.	.	2	4	4	2	2	4	5	5	3	5	3	1	4	1	3	2	5	5	5	5	5	5	5	3	3	5	5	4	4	1
Romania	1	1	2	21	1	4	4	4	5	5	3	.	4	5	3	4	4	4	4	3	4	5	5	4	5	4	3	5	5	5	5	5	5	5	5	5	4	5	1
Romania	1	1	4	19	2	.	.	.	.	4	4	3	4	4	4	4	.	4	3	3	3	.	.	2	3	1	2	5	5	5	5	4	4	3	3	4	2	6	2
Romania	1	2	3	24	2	4	3	3	3	5	2	2	4	3	1	1	1	1	1	1	1	1	1	1	1	2	2	5	4	5	5	5	5	4	5	4	5	1	1
Romania	1	2	2	22	2	.	.	.	.	2	1	5	5	5	4	.	.	4	3	3	.	.	.	2	4	4	4	5	5	5	5	5	5	4	5	5	3	1	1
Romania	1	1	2	22	2	.	.	.	.	3	3	2	2	4	2	2	2	3	2	.	.	4	.	2	4	2	2	5	4	5	5	5	5	5	5	3	4	2	1
Romania	1	1	4	20	1	.	.	.	2	2	3	1	1	3	1	1	1	1	3	2	3	1	1	1	2	2	1	5	5	5	5	5	5	5	5	5	3	2	2
Romania	2	2	2	22	2	5	.	4	.	5	4	3	5	5	4	4	4	4	5	4	.	4	.	3	5	5	4	5	5	5	5	4	4	5	4	5	5	3	1
Romania	1	2	3	22	2	2	1	2	1	3	2	4	3	3	2	4	.	3	1	.	1	4	.	2	4	3	3	5	5	5	5	2	1	5	5	3	4	1	1
Romania	1	1	2	19	2	2	2	2	2	2	2	3	4	5	3	2	2	3	4	3	5	.	3	2	4	3	4	5	5	5	5	5	5	5	5	4	4	3	2
Romania	1	1	2	19	2	4	.	4	.	5	3	4	4	4	3	4	.	4	3	.	.	.	4	2	5	3	3	5	5	5	5	5	5	5	5	5	4	4	2
Romania	1	1	2	20	2	3	2	3	2	4	2	2	4	3	3	4	3	4	4	4	3	4	3	2	2	2	1	5	3	5	5	5	4	3	4	2	3	3	1
Romania	1	.	4	19	2	.	.	.	.	3	4	3	1	.	3	3	3	3	.	.	.	3	.	3	4	5	3	5	5	5	5	5	5	5	5	5	4	1	1
Romania	2	2	3	24	2	3	.	.	.	5	2	2	1	2	1	1	.	1	5	.	1	.	.	2	3	3	2	5	4	5	2	5	5	5	5	3	2	1	1
Romania	1	2	2	22	1	.	.	.	.	4	5	5	4	3	2	3	3	2	.	.	.	.	.	1	4	2	3	5	5	5	5	5	5	4	5	3	5	3	1
Romania	1	1	4	23	2	.	.	.	.	5	1	1	3	3	3	1	1	3	4	1	.	.	.	1	2	1	1	5	3	5	5	4	4	4	4	4	1	1	1
Romania	1	2	.	22	2	.	.	.	.	3	4	5	4	4	5	5	5	5	4	4	4	5	3	3	4	4	4	5	5	5	5	4	4	4	4	4	3	4	1
Romania	1	1	2	21	2	.	.	.	.	5	2	4	4	5	4	4	4	5	4	4	.	.	.	3	4	4	3	5	5	5	5	5	5	4	5	4	2	3	2
Romania	1	1	4	22	2	.	.	4	3	3	3	4	4	3	3	3	3	3	3	3	.	3	3	3	3	3	2	5	5	5	5	4	4	4	4	4	5	2	2
Romania	1	1	2	22	2	.	.	.	.	4	4	4	4	5	3	3	4	3	4	.	.	4	.	2	4	3	4	5	5	5	5	4	4	4	5	4	4	3	1
Romania	1	1	3	19	2	.	.	.	.	2	1	3	4	2	4	3	2	3	5	2	4	4	4	4	5	4	2	5	4	3	3	5	5	5	5	4	3	2	1
Romania	1	2	3	22	1	3	3	.	.	4	2	3	4	4	2	3	4	4	3	1	.	.	.	2	2	3	3	5	5	5	5	4	4	4	4	4	3	3	1
Romania	1	1	4	22	1	.	.	.	.	2	3	1	1	3	2	2	2	2	1	1	1	1	1	3	3	3	3	5	5	1	1	3	1	3	1	1	2	2	1
Romania	1	3	3	35	1	.	.	.	.	3	4	2	3	4	5	5	4	4	4	3	3	4	3	3	4	4	3	5	5	5	5	5	5	5	5	4	2	3	1
Romania	1	1	3	20	1	2	2	1	1	4	4	3	3	3	2	2	.	.	.	.	.	.	.	2	3	2	2	2	3	4	1	5	5	5	5	5	3	1	1
Romania	1	1	3	20	2	4	.	.	.	5	3	4	3	4	4	3	4	4	.	.	.	5	.	2	4	4	4	5	3	5	5	3	3	4	4	3	2	4	1
Romania	1	1	3	25	1	.	.	.	.	2	1	4	1	1	1	1	.	2	1	1	3	.	3	1	2	5	5	5	5	5	5	5	5	5	5	5	5	1	1
Romania	1	1	3	21	2	.	4	.	4	5	3	4	3	4	4	4	.	4	4	4	.	4	.	4	3	4	3	4	3	5	1	4	4	4	4	4	4	2	1
Romania	2	1	3	19	1	2	4	3	2	2	1	2	2	3	2	3	3	2	4	2	4	3	3	1	2	2	2	.	.	.	.	.	.	.	.	.	1	1	1
Romania	1	2	3	24	1	4	4	4	4	4	4	3	1	4	4	4	.	4	4	2	5	.	5	4	4	2	4	5	5	5	5	5	5	5	5	5	6	4	2
Romania	1	1	3	24	2	4	4	4	4	4	2	5	5	5	2	1	3	3	4	.	.	3	.	3	3	2	4	5	5	5	5	4	4	4	5	4	4	1	1
Romania	1	1	4	21	2	4	4	5	4	5	4	4	4	1	4	4	5	3	2	2	1	5	3	4	4	4	4	5	5	5	4	4	4	4	4	4	3	3	1
Romania	1	.	4	18	2	.	.	.	.	5	4	4	4	3	3	3	.	4	3	2	.	.	3	2	2	3	4	5	5	5	5	5	5	5	5	4	4	3	1
Romania	1	1	2	21	2	4	4	4	4	5	5	4	4	4	4	4	4	4	4	4	5	4	4	2	4	4	4	5	4	5	5	5	5	5	5	4	4	4	2
Poland	1	2	2	23	2	.	.	.	.	3	2	4	4	3	2	5	3	4	4	.	.	3	3	1	4	4	4	5	5	5	5	4	4	5	5	4	3	2	1
Poland	1	1	3	24	2	4	3	4	3	5	4	5	4	4	.	1	4	4	.	.	.	.	.	1	3	4	4	5	3	5	5	5	5	5	5	5	4	3	1
Poland	1	2	2	22	2	5	5	5	5	5	5	5	5	5	4	4	.	4	5	5	3	4	4	2	4	4	4	5	5	5	5	5	5	5	5	5	5	2	2
Poland	1	2	3	25	1	3	2	2	1	3	4	3	5	4	3	4	5	5	5	4	3	5	3	2	4	3	2	5	4	5	5	4	4	5	4	3	4	2	1
Poland	1	1	3	21	2	3	3	.	.	5	5	4	3	3	4	2	3	4	3	3	2	3	3	3	3	3	3	5	4	5	5	4	4	4	5	3	4	3	1
Poland	1	2	4	23	2	4	4	4	4	2	2	3	4	2	4	4	4	4	4	4	4	4	4	1	2	2	2	5	4	4	4	4	4	3	4	4	1	1	1
Poland	2	3	3	36	2	3	.	2	.	3	3	4	5	5	3	4	4	4	4	4	.	4	.	3	4	3	3	5	5	5	5	4	4	4	4	4	4	4	3
Poland	1	1	3	22	2	.	.	3	3	2	2	2	3	4	4	4	4	.	.	.	.	.	.	2	4	2	2	4	4	3	1	4	4	3	4	3	1	1	1
Poland	1	1	3	20	2	.	.	.	.	3	3	3	3	4	2	3	3	2	2	3	.	4	3	4	4	4	4	5	4	5	5	4	3	3	4	3	1	1	1
Poland	1	1	3	22	2	3	.	4	4	3	3	3	3	4	3	4	4	3	4	4	3	3	4	3	4	4	3	4	4	3	3	3	3	4	4	4	4	4	2
Poland	1	2	3	23	1	4	4	.	.	3	3	4	2	1	4	3	3	2	.	2	.	4	.	3	4	4	4	5	5	5	5	5	5	4	5	3	6	2	1
Poland	1	1	3	23	1	.	.	.	.	4	2	1	1	2	1	1	4	1	1	1	4	.	1	1	1	1	5	5	5	5	5	5	5	5	5	3	1	1	1
Poland	1	2	3	22	1	2	.	.	.	3	3	4	4	2	4	4	.	4	3	.	3	3	3	3	5	4	3	5	5	5	5	5	5	5	5	5	4	3	1
Poland	1	1	3	21	1	3	3	.	.	4	4	4	4	2	4	5	.	4	3	3	4	4	4	3	4	4	4	4	4	5	2	4	4	3	4	4	1	1	1
Poland	1	1	2	21	2	5	5	5	5	4	4	4	4	4	5	4	5	4	4	4	.	4	.	3	3	4	3	5	5	4	2	4	5	4	5	4	6	4	1
Poland	1	1	3	20	2	.	.	.	.	5	4	3	3	4	3	2	3	3	2	3	2	3	4	3	2	1	2	5	5	5	5	4	4	4	4	4	6	3	2
Poland	1	1	2	21	2	4	4	4	5	4	4	4	4	4	4	2	3	4	3	3	2	4	4	4	3	3	2	5	4	3	4	5	5	5	5	3	4	4	2
Poland	1	1	3	21	2	5	5	.	.	3	4	4	3	1	3	2	4	4	3	3	3	3	3	2	3	3	3	5	5	5	5	4	4	4	4	4	3	1	1
Poland	1	1	3	20	2	.	.	4	.	3	5	5	5	5	3	2	.	4	.	.	.	.	.	2	2	2	.	5	5	5	5	3	3	3	3	3	6	1	1
Poland	1	2	3	24	1	.	.	4	.	5	5	5	5	1	5	5	5	5	5	.	.	5	.	5	5	5	5	5	5	5	5	5	4	5	5	5	5	5	1
Poland	1	1	3	24	1	.	.	.	.	3	3	3	3	3	4	3	3	3	3	3	3	3	3	2	3	2	2	5	5	5	1	4	4	4	4	3	4	3	2
Poland	1	2	3	25	2	2	2	2	2	4	4	4	4	4	4	4	3	3	.	.	.	.	.	3	4	4	4	5	3	5	5	5	5	3	4	3	4	3	2
Poland	1	2	3	24	2	.	.	.	.	1	1	1	1	1	1	1	.	1	1	3	1	2	1	1	1	1	1	5	5	3	5	5	5	4	5	5	3	2	1
Poland	2	1	2	22	1	2	2	2	2	3	4	4	4	3	2	4	3	3	2	3	2	3	3	3	3	3	3	5	4	5	5	3	3	4	4	4	.	.	.
Poland	1	1	2	21	2	4	4	4	5	4	4	3	4	3	3	3	3	3	4	3	5	3	3	3	4	3	3	5	4	5	5	4	3	2	4	4	1	1	1
Poland	1	1	3	23	2	.	.	.	.	.	4	4	4	4	3	.	.	3	3	3	4	.	.	2	2	2	2	5	5	5	5	4	4	4	4	4	5	2	1
Poland	1	1	2	22	2	5	4	3	3	4	4	4	4	4	4	5	4	4	.	.	2	4	.	4	4	4	2	5	4	5	5	5	5	5	5	5	3	4	1
Poland	1	2	2	23	2	4	4	4	4	5	3	2	3	4	5	4	4	.	.	.	2	.	.	4	4	4	4	5	4	5	5	5	5	3	4	4	4	3	1
Poland	1	2	2	24	2	5	5	.	.	4	4	4	5	5	5	3	.	5	5	.	.	.	.	2	4	4	3	5	5	5	5	5	4	4	5	4	4	2	1
Poland	1	1	2	20	2	.	4	.	4	4	4	.	4	4	4	4	.	4	.	.	.	4	.	3	4	4	4	5	5	5	5	5	5	5	5	5	4	3	1
Poland	1	2	2	22	2	5	3	.	.	2	4	3	3	4	4	4	4	3	2	.	3	.	.	3	5	4	3	5	5	5	5	5	5	5	5	5	2	2	1
Poland	1	1	2	21	1	3	3	3	3	3	3	3	3	3	3	3	3	3	3	3	.	3	3	3	3	3	3	5	5	5	3	3	3	3	3	3	1	1	1
Poland	1	2	2	23	2	4	4	4	4	4	4	3	3	4	4	4	4	4	3	3	2	4	3	3	4	4	3	4	4	4	4	4	3	3	4	3	6	6	1
Poland	1	1	2	20	2	.	3	.	3	4	3	2	2	4	4	3	.	4	4	3	2	4	3	3	4	3	4	5	5	5	5	5	5	5	5	4	3	2	1
Poland	1	1	2	19	2	.	4	2	.	2	2	3	.	2	3	2	2	3	.	.	.	.	.	2	2	2	3	5	5	2	2	5	3	3	5	3	6	3	1
Poland	1	1	2	20	2	5	.	.	.	5	4	2	4	5	4	.	.	5	3	3	5	.	.	2	3	2	3	5	5	5	5	4	3	2	2	2	4	3	1
Poland	1	1	3	21	1	.	.	.	3	3	4	5	3	4	4	1	.	4	5	5	.	.	1	3	3	2	4	5	4	3	3	5	3	5	2	3	3	3	1
Poland	1	1	2	20	2	.	.	.	.	5	5	4	3	3	5	4	.	.	.	.	3	4	.	3	4	4	4	5	4	5	5	5	3	4	4	5	6	2	1
Poland	1	1	2	20	2	.	.	.	.	3	5	5	3	4	4	3	.	3	3	2	.	.	.	4	4	2	1	4	5	1	4	5	3	2	3	3	1	1	1
Poland	1	1	2	20	2	.	.	4	.	4	3	4	3	5	4	2	.	3	.	4	.	.	.	1	3	3	2	4	5	5	4	4	4	4	5	5	4	1	2
Poland	1	1	2	20	2	.	.	.	.	5	5	.	5	5	4	5	.	4	4	.	2	.	5	2	3	2	3	5	5	5	5	5	4	5	5	5	3	1	1
Poland	1	1	2	20	2	3	3	4	.	5	4	4	4	2	1	3	3	3	1	3	1	.	.	2	1	3	1	5	5	5	5	4	4	4	4	4	.	.	.
Poland	1	1	2	20	2	.	.	.	.	5	4	4	3	4	4	.	.	4	4	.	.	.	.	2	4	2	2	5	5	5	5	4	3	4	4	3	3	2	1
Poland	1	1	2	21	2	.	.	.	.	4	4	4	4	4	4	4	4	4	.	.	4	4	.	3	4	.	3	5	5	5	5	4	4	4	4	3	2	3	1
Poland	2	1	2	24	1	5	5	.	5	5	5	5	5	5	5	.	5	5	5	5	.	5	.	1	5	1	1	5	5	5	1	5	5	5	5	5	4	3	1
Poland	1	1	2	20	2	.	.	.	.	4	4	3	4	2	4	2	3	4	4	.	2	3	1	2	4	5	3	5	5	5	5	5	5	5	5	5	1	3	1
Poland	1	2	3	24	2	.	.	.	.	4	5	4	4	4	4	3	3	4	4	.	.	3	3	2	4	4	3	5	4	1	4	4	4	4	4	4	4	3	2
Poland	1	1	2	20	2	3	4	.	.	5	4	5	4	5	4	4	3	5	5	4	5	4	4	3	3	4	3	5	5	5	4	5	4	4	4	3	4	4	2
Poland	1	1	2	19	2	4	4	3	4	3	3	3	2	4	3	4	4	4	3	4	3	3	4	2	2	2	2	5	5	5	5	4	4	4	4	3	4	4	1
Poland	1	1	2	19	1	5	5	5	5	4	4	5	3	2	4	5	.	4	4	3	4	.	.	3	4	3	2	5	5	5	5	5	4	4	5	4	5	3	1
Poland	1	1	2	19	1	4	4	.	.	2	2	2	4	4	2	.	3	4	3	.	5	.	.	2	4	3	2	5	4	5	5	5	5	5	5	5	4	4	2
Poland	1	1	2	21	2	3	1	2	4	5	3	4	4	3	4	1	.	3	3	4	3	.	.	5	4	2	2	5	4	2	5	5	5	5	5	4	4	1	1
Poland	1	1	2	20	2	3	3	.	.	2	3	.	3	3	2	3	.	4	3	3	.	3	.	3	3	4	4	5	4	5	5	3	2	2	2	4	6	1	1
Poland	1	1	2	20	2	4	3	4	3	5	5	5	5	5	5	3	.	5	5	3	4	3	3	3	4	4	4	5	5	5	5	4	5	5	5	5	3	5	1
Poland	1	1	2	20	1	3	3	3	3	3	3	3	4	4	5	5	5	4	4	4	4	4	4	2	3	2	1	5	5	5	5	5	5	5	5	5	1	1	1
Poland	1	1	2	20	2	.	.	3	.	5	4	5	5	4	4	5	4	4	3	5	3	5	5	2	3	2	4	5	4	5	5	3	3	4	4	4	6	4	2
Poland	1	1	2	20	2	.	3	.	.	4	3	3	4	4	5	4	.	4	3	3	3	4	3	2	4	3	3	5	4	4	5	4	3	3	4	4	4	3	1
Poland	1	1	2	21	2	.	2	.	.	5	2	2	3	2	4	2	.	3	4	4	2	.	4	2	3	2	1	5	4	4	4	5	3	3	4	2	4	3	1
Poland	1	1	3	21	2	3	3	3	3	4	4	4	4	3	4	3	3	3	3	3	3	3	3	3	4	4	3	5	4	5	5	5	4	5	5	5	6	3	1
Poland	1	1	2	20	2	4	3	3	3	4	3	4	4	2	4	4	.	4	2	3	2	.	3	3	4	4	2	5	5	5	4	5	4	4	5	4	5	5	2
Poland	1	1	2	20	2	5	5	3	4	5	4	3	5	5	5	3	3	4	5	4	5	5	5	5	5	4	4	5	5	5	5	4	4	4	5	4	5	5	3
Poland	1	1	2	20	2	4	3	.	.	4	3	4	3	3	3	3	4	3	2	.	3	4	.	2	3	3	2	5	.	3	4	4	3	4	4	3	5	4	2
Poland	1	1	2	19	2	1	1	1	1	2	2	2	2	2	2	2	2	2	1	1	2	2	2	4	2	2	4	2	2	2	2	2	2	2	2	2	1	1	1
Poland	1	1	4	23	2	2	2	2	2	4	3	3	4	2	4	2	2	4	.	.	.	.	.	2	3	.	.	5	5	4	3	5	5	4	5	4	5	4	2
Poland	1	1	2	20	2	5	.	3	.	5	3	4	3	2	3	.	.	2	2	4	.	3	3	2	4	2	2	5	5	5	2	5	5	5	5	5	6	5	1
Poland	1	1	2	20	2	4	.	4	.	4	4	4	4	4	5	4	4	5	5	4	5	5	5	4	4	4	4	5	5	5	5	5	5	5	5	5	5	4	3
Poland	1	1	2	19	2	2	.	2	.	5	4	4	3	4	5	2	4	4	5	3	.	2	4	3	4	3	1	5	4	4	5	4	4	3	5	4	5	4	1
Poland	1	1	2	20	1	4	4	.	.	4	5	4	4	2	3	3	2	4	2	2	4	3	4	2	3	2	2	5	4	5	5	3	3	5	4	2	3	2	1
Poland	1	1	4	20	1	1	1	.	.	1	1	1	2	4	3	3	3	2	2	2	2	2	2	3	3	3	3	5	4	5	1	3	3	3	3	3	1	3	3
Poland	1	1	3	20	1	.	.	.	.	4	3	5	4	5	4	4	3	4	4	3	3	3	3	2	4	3	4	5	5	5	5	5	5	5	5	5	5	4	1
Poland	1	1	3	20	2	.	.	.	.	5	5	5	4	4	5	4	3	4	3	3	5	3	3	4	3	3	5	5	5	5	5	5	5	5	5	5	3	4	1
Poland	1	2	3	23	2	.	.	3	.	.	.	4	5	2	5	3	.	3	.	5	.	4	.	2	4	4	3	5	4	5	5	4	5	5	5	4	4	2	1
Poland	1	2	3	22	1	2	2	2	2	2	2	2	3	3	2	2	2	3	3	3	3	3	1	2	2	2	2	.	3	3	3	3	3	3	3	3	.	.	.
Poland	1	2	3	23	1	3	3	3	.	4	4	5	5	5	4	4	4	4	5	.	4	5	.	3	5	5	5	5	5	5	4	5	5	5	5	5	4	3	2
Poland	1	2	3	21	1	4	5	5	4	4	5	4	3	4	3	4	.	3	3	3	3	4	3	4	5	4	4	1	4	4	4	4	4	4	4	4	5	4	2
Poland	1	2	2	25	2	.	.	.	.	4	4	4	4	4	3	4	4	4	.	.	2	3	.	2	3	2	1	5	5	5	5	5	3	5	5	5	3	3	1
Poland	1	2	2	23	2	.	.	.	.	1	1	.	3	4	3	3	3	4	.	.	1	4	.	5	4	3	3	5	5	5	5	5	5	3	5	4	3	3	1
Poland	1	1	.	23	2	4	4	4	4	4	4	4	4	4	3	3	3	4	4	4	3	3	3	2	4	4	3	5	3	2	2	4	4	4	4	4	5	.	2
Poland	1	1	2	22	1	.	4	.	.	5	2	2	4	3	4	2	.	4	2	.	1	4	.	2	3	2	4	5	5	2	1	4	4	2	2	5	3	3	1
Poland	1	1	4	21	1	5	5	5	5	5	5	5	5	.	5	5	5	5	5	5	5	5	5	4	3	3	3	5	5	5	2	5	5	5	5	5	6	6	6
Poland	1	1	4	18	1	2	.	3	.	4	1	2	4	5	3	2	3	2	4	3	1	4	2	2	3	4	4	4	5	3	2	5	5	5	4	5	4	1	1
Poland	1	1	3	20	1	.	.	.	.	4	4	4	2	3	3	3	3	3	3	3	.	3	3	3	3	2	2	5	5	5	3	4	3	4	4	4	4	3	1
Poland	1	1	3	21	1	.	.	.	.	3	3	2	4	3	3	4	4	4	4	4	4	4	4	4	.	4	5	5	5	5	5	4	4	4	4	4	4	5	5
Poland	1	1	4	21	1	3	3	3	3	4	3	3	2	4	3	2	3	4	4	3	2	4	3	4	4	2	2	4	4	5	3	4	3	4	4	2	4	1	1
Poland	1	1	3	21	1	3	3	3	3	3	3	3	3	3	3	3	3	3	3	3	3	3	3	3	3	3	3	5	5	1	5	3	3	3	3	3	.	.	.
Poland	1	1	3	21	1	.	.	.	.	5	4	4	4	4	4	4	4	5	4	.	3	.	.	2	3	3	3	5	5	4	1	4	4	4	4	4	4	2	2
Poland	1	1	3	21	1	5	5	5	5	5	4	4	3	4	5	5	5	5	5	4	4	5	5	4	3	3	4	5	4	3	3	4	4	4	4	4	1	1	1
Poland	1	1	3	19	1	3	3	.	.	4	3	3	3	3	5	4	5	5	4	4	4	4	4	4	4	4	4	5	5	5	3	5	5	4	4	4	6	5	5
Poland	1	1	3	19	1	.	.	4	.	4	5	5	.	4	3	3	3	4	3	.	.	4	.	3	4	2	3	5	4	5	5	4	4	4	4	4	4	3	1
Poland	1	1	3	20	1	1	1	3	3	3	3	2	3	3	4	2	3	3	2	2	2	3	3	3	3	3	2	5	5	5	1	5	5	5	5	5	5	4	1
Poland	1	1	4	20	1	4	3	3	3	5	4	4	4	4	3	3	3	3	3	3	3	3	3	3	4	3	3	5	5	5	5	4	4	3	3	3	3	4	3
Poland	1	1	3	20	2	3	2	3	3	4	4	4	4	4	2	4	3	3	3	3	3	4	3	2	5	2	2	5	4	5	5	5	3	5	4	3	4	2	1
Poland	1	1	3	19	1	.	.	.	.	5	3	2	4	5	3	2	.	4	3	.	2	.	3	2	3	2	3	5	4	5	5	5	5	5	5	4	4	2	1
Poland	1	1	3	20	1	5	5	5	3	4	3	2	5	4	3	4	3	4	2	3	3	3	3	2	4	4	4	5	5	5	5	5	5	5	5	5	4	3	1
Poland	1	1	3	21	1	.	3	.	.	2	3	4	3	1	3	3	1	3	3	3	3	3	3	3	3	3	3	5	4	3	3	4	4	4	4	4	1	1	1
Poland	1	1	4	20	1	.	.	.	.	2	1	1	1	2	3	1	.	1	4	.	.	.	4	1	2	2	1	5	5	5	3	4	3	5	5	2	1	1	1
Poland	1	2	2	23	2	.	.	.	.	4	4	4	3	3	4	4	3	3	.	.	.	3	.	3	4	4	.	5	5	4	5	5	4	4	5	5	1	2	1
Poland	1	1	4	20	1	.	.	.	.	3	2	4	3	2	4	2	.	3	.	.	3	.	.	3	4	2	2	5	5	5	1	4	4	4	4	4	5	4	1
Poland	1	1	3	20	1	.	.	.	.	2	1	1	1	1	4	3	4	4	2	.	1	.	.	2	2	1	2	5	5	5	5	4	4	4	4	4	5	4	1
Poland	1	1	3	20	1	.	.	.	.	2	3	1	4	4	3	2	.	4	2	.	.	2	3	1	3	3	2	5	5	5	5	5	4	4	4	3	4	3	1
Poland	1	1	3	20	1	.	.	.	.	5	2	4	3	2	3	3	.	3	.	4	2	.	.	4	5	3	4	5	5	5	1	5	5	5	5	5	4	3	1
Poland	1	1	2	21	2	4	4	4	4	4	4	4	5	4	4	4	3	4	4	4	5	3	4	3	4	3	3	5	5	3	3	4	4	5	5	5	5	3	3
Poland	1	2	2	23	2	4	4	.	.	5	4	3	4	5	3	3	2	3	4	4	3	3	3	2	4	4	4	5	5	5	5	5	5	4	5	4	4	3	2
Poland	1	1	2	21	2	.	1	.	.	4	4	3	4	4	2	2	.	3	.	.	1	3	.	2	3	2	1	5	5	5	5	4	4	4	4	4	3	3	1
Poland	1	1	4	19	1	4	4	3	2	4	3	3	3	3	4	2	3	2	3	3	4	4	3	2	3	2	3	5	3	3	3	3	2	4	4	3	1	1	1
Poland	2	2	2	23	2	.	.	.	.	4	3	4	4	3	4	2	4	4	.	.	1	.	.	2	2	3	2	5	4	5	5	4	4	3	4	4	3	2	1
Poland	1	1	3	20	1	2	2	2	4	3	3	1	1	1	2	1	3	1	1	3	.	3	3	1	1	1	1	5	5	5	1	4	4	5	5	2	5	1	1
Poland	2	3	2	37	1	5	5	5	5	5	5	5	5	5	5	5	5	5	5	5	5	5	5	5	5	5	.	5	5	5	5	4	4	4	4	4	3	3	2
Poland	1	1	.	20	2	.	.	.	.	4	2	4	4	4	3	2	.	3	4	3	3	3	3	4	3	3	2	5	4	5	4	5	5	5	5	4	3	3	1
Poland	1	1	3	20	2	.	.	.	.	2	2	1	1	1	4	4	3	2	1	1	4	1	1	2	2	1	1	5	5	5	5	4	4	4	5	4	4	3	2
Poland	1	1	4	20	1	3	3	3	3	2	2	3	1	1	1	1	1	1	1	3	3	3	3	5	3	2	1	4	4	3	3	5	3	4	4	4	5	6	1
Poland	1	1	4	21	4	3	.	3	.	3	3	3	3	3	3	.	3	3	3	.	.	3	.	2	3	4	3	4	4	4	1	3	3	3	4	3	3	3	3
Poland	1	1	4	20	2	5	.	5	.	2	3	3	4	4	3	2	.	3	.	.	.	.	.	.	4	4	4	4	5	5	5	5	5	5	5	5	4	3	1
Poland	1	1	4	21	1	2	2	2	2	4	3	3	3	3	2	3	3	4	2	3	3	3	3	3	2	2	2	5	3	5	1	4	3	4	4	3	5	4	1
Poland	1	1	4	21	1	3	3	3	3	3	3	3	3	3	4	3	3	3	3	3	3	3	3	3	3	3	2	5	5	5	5	4	4	4	4	4	3	2	2
Poland	1	1	4	21	1	5	4	5	3	4	3	2	3	1	4	4	.	3	.	.	5	.	.	3	4	3	2	5	5	5	5	5	5	5	5	5	4	3	1
Poland	1	1	4	22	1	5	4	5	4	4	4	4	5	4	5	4	3	4	4	5	4	4	4	4	4	4	3	4	4	4	2	4	4	4	4	3	4	4	2
Poland	1	1	4	21	1	.	.	.	.	.	.	3	3	3	3	3	3	3	3	3	3	3	3	3	3	3	3	5	4	5	5	5	4	3	3	4	3	3	3
Poland	1	1	3	20	1	3	3	3	3	2	3	3	4	1	1	1	1	3	3	4	3	3	3	3	3	3	3	4	4	3	3	3	3	3	3	3	4	3	3
Poland	1	1	4	20	1	2	.	2	.	3	3	3	1	2	3	1	.	2	3	3	3	.	3	1	3	2	1	5	4	5	1	3	3	3	3	2	6	1	1
Poland	1	1	4	21	1	.	4	.	4	4	4	4	5	5	4	4	.	4	.	.	.	.	.	3	3	3	4	5	5	5	5	5	5	5	5	5	6	3	1
Poland	1	1	3	21	1	3	3	2	2	3	3	3	3	3	3	3	3	3	3	3	3	3	3	3	3	3	3	2	3	2	3	3	3	3	3	3	3	5	4
Poland	1	2	2	24	2	4	3	.	3	5	4	4	5	5	4	4	4	4	.	.	3	.	.	.	4	4	4	5	5	5	5	5	4	4	5	5	4	2	2
Poland	1	1	.	18	4	4	3	4	.	4	.	3	4	3	4	2	.	2	2	.	.	.	1	3	2	2	1	5	4	5	2	2	2	2	3	3	4	2	1
Poland	1	2	2	25	2	5	5	5	5	4	5	4	4	4	4	4	4	5	4	4	4	4	4	3	5	5	3	5	5	5	5	4	4	4	4	4	4	4	2
Poland	1	2	2	20	2	.	.	.	.	2	1	1	2	1	2	4	.	2	.	3	4	2	.	1	2	1	1	5	5	5	4	4	4	4	4	3	6	3	1
Poland	1	1	2	21	2	1	1	1	1	1	1	1	1	1	1	1	2	1	1	4	3	3	3	2	2	2	2	4	4	4	4	3	4	4	3	4	.	.	.
Poland	1	2	2	25	1	4	.	4	.	4	4	3	3	3	4	4	2	3	4	.	.	2	.	2	2	2	2	5	5	5	5	4	4	4	4	4	4	3	1
Poland	1	2	2	23	2	3	3	.	.	4	4	4	3	2	4	3	.	4	3	4	.	3	4	3	4	2	2	4	3	2	3	3	2	4	4	3	3	1	1
Poland	2	2	2	24	2	5	.	.	.	4	4	5	4	5	4	4	4	4	.	4	.	.	4	4	5	5	4	5	5	5	5	4	4	5	5	5	4	2	2
Poland	2	1	2	21	2	.	.	.	.	5	2	3	3	3	4	4	4	4	4	4	.	.	4	2	4	3	2	5	5	4	1	5	5	5	5	5	2	2	1
Poland	2	1	2	22	2	.	.	.	.	5	4	4	4	2	4	3	5	4	.	1	.	.	.	1	4	4	4	5	5	5	5	5	5	5	5	5	2	2	.
Poland	2	1	2	29	1	.	.	.	.	.	.	3	.	4	4	.	4	.	.	4	.	.	.	2	4	4	4	5	5	4	5	5	5	5	5	5	2	2	1
Poland	1	1	2	23	1	.	.	.	.	1	2	3	4	1	1	1	3	4	1	1	1	3	1	1	2	2	2	4	2	5	1	4	3	2	4	2	1	3	1
Poland	1	1	2	21	2	2	2	4	4	5	2	5	5	3	4	4	2	5	4	3	3	4	3	3	4	3	3	5	5	5	5	4	4	4	4	4	4	3	2
Poland	1	1	2	20	2	3	4	.	4	4	5	2	3	1	4	4	.	4	.	2	1	5	5	1	1	2	5	5	4	1	2	5	2	4	5	5	6	2	1
Poland	1	1	2	21	2	5	5	5	5	5	4	3	4	2	4	3	.	4	3	.	2	4	2	4	4	4	3	4	5	5	5	5	5	5	5	5	4	3	1
Poland	1	2	2	22	2	5	.	.	.	4	2	4	4	4	3	5	4	3	.	.	.	.	.	3	4	4	2	4	4	5	5	4	5	3	5	3	4	2	1
Poland	2	2	2	24	2	4	.	.	.	4	3	4	3	4	3	5	5	3	4	3	3	3	3	3	4	3	3	5	5	5	5	5	5	5	5	5	2	2	1
Poland	2	2	3	22	2	3	3	.	.	4	3	4	3	4	4	4	4	4	3	.	4	3	3	3	5	5	5	5	5	5	5	5	5	5	5	5	5	4	3
Poland	1	1	3	22	2	3	3	.	.	3	3	3	2	1	2	2	2	2	2	2	2	3	3	1	2	1	1	5	4	5	5	4	4	4	4	4	6	1	1
Poland	1	2	2	23	1	3	.	.	.	3	2	4	4	4	3	3	.	2	2	5	.	.	3	2	3	3	4	5	5	2	1	4	4	4	4	3	3	4	1
Poland	2	2	3	25	2	5	5	5	5	3	3	3	3	3	3	3	3	3	3	3	3	3	3	3	3	3	3	5	4	4	4	4	4	4	4	4	.	.	.
Poland	1	1	3	20	2	.	.	.	.	3	3	3	3	2	2	2	2	2	3	3	3	4	3	3	1	3	3	5	2	1	3	3	3	4	4	3	.	.	.
Poland	1	1	3	21	2	3	3	3	3	3	3	3	3	3	3	3	3	3	3	3	3	3	3	3	3	3	3	5	5	5	5	3	3	4	4	3	3	5	1
Poland	1	1	3	21	2	4	4	2	2	3	4	4	4	2	4	1	3	3	3	3	3	3	3	4	3	2	2	5	5	5	5	4	4	4	5	5	3	4	1
Poland	1	1	3	20	2	2	3	.	.	4	4	3	4	5	4	2	3	4	4	4	5	3	3	3	4	2	3	3	3	4	4	4	4	4	5	5	2	2	1
Poland	1	1	4	20	1	2	2	2	2	3	3	4	5	3	3	4	.	3	4	.	.	4	3	3	3	3	3	5	5	5	5	5	5	5	5	5	6	4	5
Poland	1	1	4	20	1	.	.	.	.	3	3	3	3	1	3	2	.	3	3	3	3	3	3	1	2	1	1	4	3	4	3	3	3	4	4	3	4	3	1
Poland	1	1	3	25	2	4	.	4	.	4	3	3	2	4	3	3	3	3	3	3	3	3	3	2	4	4	4	4	3	4	4	4	4	4	4	4	1	1	1
Poland	1	1	2	20	2	4	5	4	4	4	2	5	5	4	3	4	.	4	.	.	.	.	.	1	2	2	2	5	5	5	5	5	4	4	4	3	3	1	1
Poland	1	1	4	24	1	.	.	.	.	2	4	5	3	3	2	.	3	3	.	.	.	3	.	1	4	2	1	5	5	5	5	4	5	4	5	4	4	4	1
Poland	1	1	3	21	1	.	.	.	.	3	1	4	5	3	4	4	4	4	.	4	.	4	.	3	4	4	3	5	5	5	5	5	5	5	5	5	6	4	1
Poland	1	1	2	20	2	4	4	.	.	5	4	4	5	3	3	.	3	3	3	3	3	4	.	2	4	2	3	5	5	5	5	3	4	4	4	4	4	3	1
Poland	1	1	4	20	1	.	.	.	.	4	4	4	4	4	4	4	4	4	4	3	3	4	4	3	4	3	3	5	4	5	2	4	4	3	4	4	6	4	3
Poland	1	1	4	24	2	3	1	4	2	5	5	4	3	.	3	2	4	3	2	3	2	3	2	2	3	2	3	5	4	4	3	4	3	4	4	3	1	1	1
Poland	1	1	4	21	1	5	.	5	.	5	5	5	5	4	5	5	.	4	4	.	.	5	5	3	4	4	2	5	5	5	5	5	5	5	5	5	6	3	1
Poland	1	1	4	21	1	.	.	.	.	4	2	3	2	1	1	2	3	2	3	3	4	2	2	4	2	2	2	5	5	5	4	4	4	4	4	4	1	1	1
Poland	1	1	2	19	2	.	.	.	.	5	4	4	5	4	2	.	4	4	.	.	.	4	.	2	2	1	2	5	5	5	5	5	4	4	5	4	4	4	1
Poland	1	1	2	19	1	3	3	3	.	4	2	3	2	3	2	2	2	2	2	.	.	3	3	3	3	3	3	5	5	5	1	4	4	4	4	4	2	3	1
Poland	1	1	3	21	2	4	4	.	.	5	5	5	5	4	4	4	4	4	4	4	3	4	4	4	5	4	4	5	5	5	5	4	4	4	4	4	.	.	.
Poland	1	1	4	20	1	2	2	.	.	3	3	3	3	3	1	1	2	1	3	3	.	.	3	1	2	3	4	5	5	5	3	5	5	4	5	5	6	3	1
Poland	2	1	3	20	1	.	.	.	.	5	1	2	5	1	4	1	3	1	1	.	.	.	.	5	5	5	1	5	5	5	1	5	5	5	5	5	4	2	1
Poland	1	2	3	24	2	.	.	.	.	4	4	4	4	4	4	4	4	4	4	.	.	.	.	3	4	4	4	5	3	1	5	4	4	4	5	4	4	2	1
Poland	1	1	2	21	2	.	4	.	3	4	2	4	4	4	3	2	4	4	.	5	4	4	.	2	3	3	3	5	5	5	5	5	5	5	5	5	5	3	1
Poland	1	2	2	34	2	4	2	.	2	5	5	3	3	1	2	2	3	1	2	3	2	3	.	1	2	2	2	5	5	3	5	3	4	4	4	4	1	1	1
Poland	2	1	2	20	2	.	3	.	3	3	3	3	4	3	3	3	3	3	3	3	3	3	3	3	3	3	4	4	4	4	5	3	3	4	4	3	1	1	1
Poland	1	1	4	21	2	2	3	2	3	4	3	3	2	2	2	2	3	3	3	3	3	3	3	2	2	2	3	3	3	2	4	3	2	4	2	3	1	1	1
Poland	1	1	3	21	2	3	.	.	.	4	3	4	5	3	4	2	.	3	3	.	4	.	.	4	3	3	3	5	4	5	5	5	3	5	5	4	4	3	1
Poland	1	2	2	23	2	.	.	.	.	4	4	2	4	4	4	3	.	3	3	3	2	3	3	2	3	3	2	5	3	5	5	5	5	5	5	4	4	3	1
Poland	1	1	4	22	1	.	.	.	.	5	4	4	4	4	5	5	5	5	4	4	4	4	4	3	5	3	3	5	5	5	5	5	5	5	5	5	6	3	1
Poland	2	2	2	22	2	2	5	.	.	4	2	4	4	4	4	5	.	4	3	.	1	.	.	2	5	4	5	5	4	5	5	4	4	4	4	4	5	2	1
Poland	1	1	2	32	1	.	.	.	.	5	5	5	5	5	4	4	4	4	4	4	4	4	4	3	3	3	3	4	4	4	4	4	4	4	4	4	4	4	4
Poland	2	1	2	19	2	4	4	4	3	3	3	4	5	5	4	5	5	4	4	4	3	4	4	3	4	4	4	5	5	4	4	4	4	5	5	4	4	3	1
Poland	1	1	4	22	2	3	3	3	3	3	3	3	3	3	3	3	3	3	3	3	3	3	3	3	3	3	3	3	5	3	3	3	5	4	4	2	2	3	2
Poland	1	1	4	23	1	2	2	2	2	1	3	3	3	2	3	3	3	2	2	2	1	1	2	3	3	3	2	4	2	3	1	3	2	1	3	1	5	2	1
Poland	2	2	2	27	2	.	3	.	3	5	4	3	1	1	1	3	1	1	1	1	1	1	1	1	1	1	1	5	4	2	4	5	5	4	4	3	6	4	2
Poland	1	1	4	21	2	.	.	.	.	3	4	3	4	4	4	.	4	4	4	3	3	3	3	3	4	3	3	5	4	5	5	3	3	3	3	3	1	1	1
Poland	2	2	2	27	2	.	.	.	.	3	4	.	4	4	3	3	.	3	.	.	3	3	.	1	2	3	2	5	5	5	5	5	5	5	5	5	4	2	1
Poland	1	1	3	20	2	4	4	4	4	4	4	4	4	3	2	4	4	3	4	3	3	3	3	2	2	3	3	5	4	4	3	5	5	5	5	5	6	3	2
Poland	1	1	4	21	1	4	3	4	2	4	3	3	4	2	2	2	.	3	3	2	.	3	2	3	2	4	4	5	5	5	1	4	4	4	4	4	4	3	1
Poland	2	1	2	21	2	5	5	4	.	2	3	3	5	4	4	2	.	4	4	.	.	4	.	3	4	4	3	4	5	4	3	4	4	3	5	.	4	3	1
Poland	1	1	3	21	2	4	4	4	4	4	4	4	4	2	4	3	4	4	4	4	4	4	4	3	4	4	3	5	5	5	5	3	2	4	4	4	4	3	1
Poland	2	1	3	22	2	4	4	4	4	4	3	4	4	3	4	4	4	4	4	4	.	4	.	2	4	4	3	5	5	5	5	4	4	4	4	4	5	3	3
Poland	1	1	3	21	2	.	.	.	.	3	3	3	2	2	3	3	3	1	1	1	2	2	2	3	4	3	3	5	4	5	5	5	5	4	5	5	4	4	1
Poland	2	2	2	33	2	5	5	.	.	5	4	5	4	2	4	5	.	4	.	.	3	.	.	.	4	4	4	5	5	1	5	4	3	2	4	4	6	3	1
Poland	1	1	4	22	1	.	5	.	5	4	.	5	5	5	1	3	.	1	1	1	.	.	1	3	1	1	1	5	5	5	5	5	5	5	5	5	6	2	1
Poland	1	1	4	21	1	3	4	3	4	2	3	3	.	3	3	2	3	4	3	4	3	3	4	2	4	2	2	5	3	5	1	4	3	4	4	4	.	.	.
Poland	1	1	2	21	1	3	2	3	3	3	2	3	3	2	4	.	3	3	3	4	3	4	3	3	2	3	3	4	3	4	3	3	3	3	3	3	3	3	3
Poland	1	1	4	21	1	4	4	4	4	5	5	5	5	5	4	4	4	4	4	4	.	.	.	4	5	4	4	5	5	5	5	5	5	5	5	5	2	3	1
Poland	1	1	1	20	1	4	4	.	.	4	3	2	4	2	1	3	.	2	2	3	3	3	3	1	2	2	2	5	3	5	1	5	5	5	5	3	1	1	1
Poland	1	1	4	22	2	.	.	.	.	4	4	3	4	5	5	.	.	4	4	.	.	4	.	2	5	4	5	5	5	5	5	5	5	5	5	5	4	3	1
Poland	2	1	3	23	2	1	1	1	1	2	2	2	1	1	1	1	1	3	1	4	.	.	.	3	4	4	4	5	5	5	5	5	5	5	5	5	4	1	2
Poland	1	3	3	26	2	2	2	2	2	2	2	3	3	3	.	1	1	1	1	1	1	1	1	3	3	2	2	5	3	5	5	3	3	3	3	3	3	3	1
Poland	2	2	2	26	2	4	3	2	4	4	4	4	4	4	3	2	3	4	4	4	4	3	3	2	3	3	3	3	3	4	2	2	3	3	4	4	4	4	4
Poland	1	2	3	23	2	2	3	3	3	2	2	3	2	3	2	2	3	3	2	2	.	.	3	3	3	3	2	4	4	4	5	4	4	4	4	3	3	3	1
Poland	1	1	4	21	1	.	.	.	.	2	2	3	4	2	2	2	.	3	3	3	.	3	3	2	3	2	2	5	3	5	3	4	4	4	4	4	3	1	1
Poland	1	1	3	22	1	.	.	.	.	2	2	4	3	1	3	2	.	2	2	.	1	.	.	2	4	1	3	5	5	5	1	5	4	4	4	5	4	2	1
Poland	1	2	2	23	2	.	.	.	.	5	4	3	4	3	2	3	3	3	.	.	.	.	.	3	4	4	4	5	5	5	5	4	2	4	4	3	4	2	1
Poland	1	1	3	20	2	2	2	2	2	2	2	2	2	2	2	2	2	2	2	2	4	4	4	2	5	4	4	5	4	5	5	4	5	4	4	4	3	2	2
Poland	1	1	3	21	2	4	.	3	3	3	3	4	5	1	2	.	.	3	2	2	3	.	.	2	2	4	3	5	5	5	1	5	5	4	4	4	.	3	1
Poland	1	2	3	23	1	3	3	3	3	2	4	4	2	3	2	5	3	2	4	2	4	5	3	4	2	2	1	3	4	5	2	4	3	3	2	3	4	4	2
Poland	1	1	1	22	1	2	1	1	1	4	3	3	4	3	2	2	2	2	2	2	2	3	2	1	2	3	4	5	4	5	5	5	5	4	5	5	1	1	1
Poland	1	1	2	20	2	2	2	.	.	4	3	3	3	5	4	.	.	4	3	.	3	4	4	2	3	3	3	5	5	5	5	4	4	5	5	4	4	3	1
Poland	1	1	4	20	2	.	.	.	.	5	3	4	4	3	3	3	3	3	3	.	3	3	3	1	2	2	3	5	5	5	5	4	3	3	4	4	4	3	1
Poland	1	1	1	21	2	.	.	.	.	5	5	4	4	4	5	5	.	5	.	.	.	.	.	3	5	4	4	5	5	5	5	5	5	5	5	5	6	6	1
Poland	2	2	2	23	2	.	4	.	4	3	3	4	3	2	3	3	3	3	3	.	2	3	.	3	3	3	3	5	5	4	5	4	4	3	4	4	5	3	1
Poland	1	1	4	21	2	4	.	4	4	5	5	5	4	4	5	4	.	4	4	4	4	4	5	3	2	4	2	4	5	5	5	5	5	5	5	5	4	1	1
Poland	1	1	3	21	2	.	.	.	4	4	3	4	4	2	4	4	3	3	3	3	4	4	2	2	4	4	4	5	5	5	4	3	2	3	3	2	6	4	2
Poland	1	1	3	20	2	.	.	.	.	4	4	4	3	2	4	3	3	4	3	3	5	.	.	3	4	2	4	5	2	3	3	4	3	3	4	3	.	.	.
Poland	1	1	3	21	2	.	.	.	.	4	3	3	2	1	5	1	3	3	4	.	.	3	3	4	4	1	1	4	5	4	1	3	3	3	3	3	1	1	1
Poland	1	2	3	22	2	.	.	2	2	4	3	4	3	4	3	3	.	3	4	.	3	.	3	4	4	2	3	5	2	1	5	4	3	4	4	4	3	4	1
Poland	1	1	1	21	2	.	4	.	4	4	3	3	3	3	5	3	2	3	.	.	.	.	.	2	4	2	3	5	5	5	5	4	4	4	4	4	5	3	1
Poland	1	2	2	24	1	.	.	.	.	1	2	1	2	2	2	2	.	.	.	.	.	.	.	5	5	4	2	5	5	5	5	5	5	4	5	5	4	4	2
Poland	1	1	4	21	1	4	4	4	4	4	4	4	4	4	3	3	3	4	4	4	3	3	3	4	4	4	3	5	4	5	5	5	5	5	4	4	2	1	4
Poland	1	1	3	22	2	5	5	5	5	5	4	5	5	4	5	.	4	4	.	4	5	4	4	2	4	4	4	5	3	5	5	5	5	5	5	5	1	1	1
Poland	1	2	3	23	2	.	.	.	.	4	4	4	4	2	2	2	2	3	.	4	.	.	.	3	4	1	2	5	5	5	5	5	5	5	5	4	5	5	1
Poland	2	1	3	25	2	.	.	.	.	3	2	3	2	2	3	3	3	3	.	3	3	.	.	2	3	3	3	5	4	5	5	3	3	4	4	3	4	2	2
Poland	1	1	3	20	2	2	2	3	2	3	1	3	3	2	3	3	3	2	3	3	3	3	3	3	2	2	2	2	2	4	4	3	3	3	3	3	.	.	.
Poland	1	2	2	23	1	2	2	1	2	4	4	3	5	4	3	3	3	4	3	.	.	4	4	3	2	3	3	3	.	5	3	4	3	3	5	3	6	4	1
Poland	1	1	2	20	1	3	5	.	4	3	2	5	4	1	3	5	4	4	5	3	3	4	4	4	3	2	3	5	5	5	2	4	.	5	5	5	6	6	2
Poland	1	1	4	22	2	2	1	2	2	3	2	3	3	3	1	1	3	2	2	2	1	.	2	1	1	1	3	3	2	2	1	4	3	3	3	1	3	4	1
Poland	1	1	1	21	2	.	5	.	5	4	4	.	3	4	4	4	.	4	4	.	.	.	.	3	3	3	2	5	4	5	5	5	3	4	4	4	4	3	1
Poland	1	2	2	24	1	5	.	.	.	5	4	4	5	5	5	.	4	5	3	3	.	.	.	3	4	4	4	5	5	5	5	5	5	5	5	4	4	4	1
Poland	1	2	3	24	1	3	3	4	3	3	4	3	4	3	2	3	3	4	.	3	4	3	3	3	3	3	3	5	5	5	3	5	5	4	4	4	2	2	2
Poland	1	1	2	20	2	4	4	4	.	4	4	4	4	4	3	4	.	3	3	3	3	.	3	1	2	4	4	5	5	5	5	5	5	5	5	5	4	2	1
Poland	1	1	2	21	2	3	.	.	.	5	2	3	3	4	4	2	.	3	.	4	.	4	4	3	4	.	.	5	4	5	3	5	4	4	5	4	4	2	2
Poland	1	2	3	33	2	.	.	.	.	5	5	5	1	5	1	1	1	3	3	1	1	.	.	1	1	5	5	5	5	5	1	1	1	4	.	1	2	2	1
Poland	1	2	3	24	2	1	1	4	4	4	4	4	4	2	4	4	4	4	2	2	4	1	2	3	4	4	5	5	5	1	1	5	3	4	5	5	1	1	1
Poland	1	2	3	23	1	3	3	.	3	4	4	4	4	4	4	4	4	4	4	4	1	4	4	4	4	4	4	2	2	2	2	4	3	3	4	3	1	1	1
Poland	1	2	2	24	2	.	.	.	.	5	2	2	3	2	4	3	2	3	2	.	2	.	.	4	5	5	3	5	4	5	5	5	4	5	5	3	3	3	1
Poland	2	2	4	23	2	.	3	3	3	4	4	4	4	4	3	3	3	3	3	3	4	3	3	3	3	3	3	5	2	5	5	4	4	.	4	3	4	4	1
Poland	1	2	3	22	1	3	3	.	.	3	3	3	3	4	3	3	2	2	2	3	3	3	3	4	2	2	2	5	5	5	5	4	4	3	4	3	1	1	1
Poland	1	2	3	23	1	3	4	1	1	3	4	2	4	4	4	1	2	5	4	5	5	3	5	4	5	5	3	5	5	5	5	5	5	5	5	2	2	1	6
Poland	1	1	2	21	1	2	2	2	2	2	2	.	3	3	4	3	.	2	2	.	2	.	.	3	3	4	4	5	5	5	1	5	5	4	5	4	1	3	1
Poland	1	.	.	.	.	.	.	.	.	5	4	3	4	4	4	3	3	5	.	.	.	.	.	3	4	3	2	5	5	5	3	5	5	5	5	5	3	4	1
Poland	1	1	2	21	1	3	3	3	3	4	4	2	4	1	3	2	2	4	3	2	3	3	3	.	3	2	3	5	3	4	1	3	3	5	4	3	.	.	.
Poland	1	1	3	22	2	4	4	4	4	4	4	4	4	4	4	4	4	4	4	4	4	.	4	4	4	4	4	4	4	5	4	4	4	4	4	4	4	2	2
Poland	1	2	1	25	2	4	.	.	.	4	5	4	4	5	5	5	.	4	4	.	.	.	.	2	2	2	2	5	5	5	5	5	5	5	5	5	4	2	1
Poland	1	1	2	20	2	.	3	.	.	4	4	3	2	3	3	.	4	3	3	3	3	3	3	3	4	3	2	5	5	5	5	4	4	4	4	4	3	3	1
Poland	1	1	2	20	2	.	.	.	.	5	5	5	5	4	4	.	.	4	3	.	3	.	.	3	.	3	3	4	4	3	3	5	4	5	5	4	6	4	1
Poland	2	2	1	25	2	.	.	.	.	3	3	3	3	3	4	2	.	3	.	.	.	.	4	2	3	4	4	5	5	1	3	3	3	3	3	2	1	1	1
Poland	1	1	2	20	2	4	.	4	.	5	4	2	1	4	4	2	.	4	.	.	3	.	.	5	5	5	5	5	5	5	5	5	5	5	5	5	2	2	1
Poland	1	1	3	20	2	3	3	3	3	4	5	4	3	4	5	3	4	3	3	2	4	3	2	3	4	3	3	3	4	2	3	3	4	3	3	4	3	4	3
Poland	1	1	3	20	2	.	.	.	.	4	3	2	2	2	2	2	4	3	3	3	3	3	3	4	4	2	4	5	3	5	3	4	4	4	4	4	5	3	1
Poland	1	1	2	20	2	3	3	.	.	4	2	3	3	4	2	.	.	3	3	3	3	3	3	2	3	2	2	4	4	4	5	3	3	3	4	4	4	4	3
Poland	1	1	3	19	2	2	2	2	2	3	2	.	.	2	2	2	2	3	.	.	4	.	.	3	2	2	2	5	3	4	4	3	.	3	4	3	5	3	1
Poland	1	.	3	20	2	.	.	.	.	4	2	3	2	2	4	2	3	4	2	2	4	4	3	2	4	3	2	5	5	5	5	5	5	4	5	5	4	1	1
Poland	1	2	2	23	2	.	.	.	.	4	3	3	4	2	4	4	4	2	2	2	2	2	2	2	2	2	2	4	4	4	4	4	4	4	4	4	1	1	1
Poland	1	1	4	22	2	.	.	.	.	3	2	2	4	2	4	3	1	3	3	3	1	.	2	4	3	2	2	5	4	5	4	5	5	5	5	4	3	1	1
Poland	1	1	4	27	2	4	.	.	.	2	4	4	5	3	4	.	3	3	3	3	3	3	3	3	3	3	3	5	5	5	2	3	3	3	3	3	3	3	6
Poland	1	2	3	20	1	.	.	.	.	4	2	3	4	2	4	3	.	3	2	3	.	3	.	2	4	4	3	5	4	5	3	5	5	4	4	4	4	3	2
Poland	1	2	3	23	2	.	.	.	.	5	2	3	3	4	4	4	.	3	.	.	.	.	.	2	4	4	4	5	5	4	1	5	5	5	5	5	3	4	1
Poland	1	2	3	21	1	5	5	5	5	4	4	4	4	4	4	2	3	4	3	3	3	4	4	3	4	4	3	5	5	5	5	5	5	5	2	4	6	5	2
Poland	1	2	4	25	1	4	.	4	.	4	4	4	3	4	3	3	3	4	4	.	.	.	4	4	5	4	3	5	4	5	1	5	5	5	5	5	4	3	1
Poland	1	2	1	22	2	4	3	4	3	4	4	4	4	4	5	4	4	3	3	3	3	3	3	4	4	4	3	5	5	5	5	4	4	4	4	4	5	4	1
Poland	.	2	4	22	1	5	3	4	3	4	4	3	.	3	4	4	4	3	3	4	2	4	4	3	5	4	5	4	4	4	4	4	4	4	4	4	2	2	2
Poland	1	2	3	22	1	1	1	1	1	1	1	1	1	1	5	5	5	3	3	3	3	3	3	5	5	5	1	5	5	5	5	5	5	5	5	5	4	4	4
Poland	1	2	3	23	1	5	4	5	4	5	4	4	5	5	3	3	.	3	3	3	.	.	.	4	5	5	4	5	5	5	1	5	4	5	5	5	4	4	3
Poland	1	2	3	22	1	.	.	4	.	5	5	5	5	4	4	5	.	5	4	.	.	.	.	3	4	4	4	5	4	5	5	5	5	5	5	4	4	4	3
Poland	1	2	1	22	2	2	.	2	.	4	3	3	4	4	3	3	.	3	3	.	.	3	.	2	3	.	.	5	4	5	5	4	3	3	4	4	6	4	1
Poland	1	2	4	23	1	4	.	4	3	4	3	4	4	3	4	4	.	4	4	4	3	.	.	3	3	3	.	5	5	2	5	4	4	4	3	4	4	4	2
Poland	1	2	3	23	4	4	.	4	.	3	4	4	2	4	3	4	2	2	4	4	3	5	4	2	3	3	4	5	4	5	3	5	5	5	5	5	6	4	1
Poland	1	2	3	23	1	4	4	4	4	4	4	4	5	4	4	4	3	4	4	3	3	4	3	3	4	3	4	5	4	5	5	5	5	5	5	5	1	1	1
Poland	1	2	3	23	1	3	.	3	.	4	4	4	4	4	4	4	.	3	3	.	.	3	3	4	5	5	4	5	5	5	5	5	5	4	4	4	6	4	1
Poland	1	2	3	22	1	5	4	5	4	4	4	4	5	4	5	5	4	5	5	.	.	.	.	4	5	5	3	5	5	5	2	5	5	5	5	5	5	5	2
Poland	1	2	3	22	1	.	.	.	.	4	4	3	4	4	4	3	.	4	4	4	.	3	.	4	4	4	2	5	4	4	4	5	5	5	5	5	6	6	1
Poland	1	2	3	23	1	.	.	4	.	5	4	4	5	4	5	4	.	5	.	.	.	5	.	4	5	5	4	5	4	5	5	5	5	5	5	5	4	4	1
Poland	1	2	3	25	1	4	.	3	.	4	4	4	4	3	3	3	3	4	.	.	4	4	4	3	4	3	.	5	5	5	5	5	5	4	3	3	4	4	1
Poland	1	2	1	23	2	4	.	3	.	4	4	4	4	3	3	3	3	4	.	.	4	4	4	3	4	3	.	5	5	5	5	5	5	4	3	4	5	3	1
Poland	1	2	4	22	1	4	.	.	.	4	4	4	3	2	3	2	2	1	1	.	.	3	.	2	2	2	2	5	5	5	5	5	3	3	5	5	5	3	1
Poland	1	2	3	23	2	4	5	4	4	5	3	4	3	2	5	3	3	4	4	4	3	3	4	3	4	3	3	5	5	5	5	5	5	5	5	5	1	3	1
Poland	1	2	1	23	2	2	2	2	2	3	3	3	3	3	3	4	4	3	4	3	3	3	3	3	3	3	3	5	4	5	1	4	2	2	3	3	3	2	1
Poland	1	2	3	23	1	4	4	4	4	4	4	4	5	4	4	4	.	4	.	4	.	.	.	4	5	3	4	5	5	5	2	5	5	5	5	4	6	5	3
Poland	1	2	4	22	2	1	1	1	1	5	4	3	5	4	5	5	5	5	1	5	5	5	5	3	3	3	3	5	5	5	5	5	5	5	5	5	6	6	1
Poland	1	2	1	22	1	3	3	3	2	3	2	2	2	2	3	2	4	2	2	.	.	3	2	4	4	3	2	5	4	5	1	5	5	4	4	4	1	1	1
Poland	1	2	3	22	2	2	4	4	.	4	3	4	4	4	4	4	.	4	2	4	3	.	4	4	4	4	3	5	5	5	5	5	5	5	5	5	5	5	1
Poland	1	2	3	23	1	3	.	3	.	3	4	4	4	.	4	4	.	4	2	4	.	4	.	5	5	4	4	5	4	5	3	5	5	3	4	4	1	1	1
Poland	1	2	3	21	2	4	.	4	.	5	2	4	2	1	4	1	.	3	5	.	3	.	.	2	4	.	1	5	5	5	5	5	5	5	5	5	1	1	2
Poland	1	2	1	23	1	3	.	4	3	4	3	4	3	4	4	4	4	4	4	4	.	.	.	3	4	3	4	5	5	5	5	5	5	5	5	5	5	5	3
Poland	1	2	4	23	2	2	3	.	.	4	4	.	5	4	5	5	5	5	5	5	.	5	5	4	5	4	5	5	5	5	2	5	5	5	5	5	6	6	2
Poland	1	2	3	22	1	4	4	4	4	4	4	4	4	4	4	4	4	4	4	4	4	4	4	4	4	4	4	5	5	5	5	5	5	5	5	5	1	1	1
Poland	1	2	4	23	1	4	.	5	.	5	5	5	5	5	5	5	.	4	4	4	4	4	4	1	4	3	.	5	5	5	5	4	4	4	4	4	4	4	1
Poland	1	2	4	23	1	.	.	3	1	4	1	4	4	2	3	1	.	1	.	.	4	2	.	1	1	2	3	5	5	5	5	4	5	5	5	4	4	4	1
Poland	1	2	1	23	1	1	1	1	1	1	1	1	1	1	1	1	1	1	1	1	1	1	1	1	1	1	1	5	5	5	5	5	5	5	5	5	6	6	6
Poland	1	2	3	23	1	2	2	4	3	4	4	4	4	3	5	5	5	5	5	5	3	5	5	4	5	5	5	5	5	5	5	5	5	4	4	5	4	4	2
Poland	1	2	1	22	1	4	4	3	3	4	3	4	5	2	.	4	4	4	4	.	.	.	.	2	3	3	3	5	5	5	1	5	4	4	4	4	6	5	1
Poland	1	2	3	21	1	4	4	4	4	4	4	4	4	4	4	4	3	4	4	4	3	3	3	3	4	4	3	5	4	4	2	4	4	5	5	4	5	6	1
Poland	1	2	3	23	2	3	.	3	.	5	5	5	5	3	5	4	.	5	.	.	.	.	.	3	5	5	5	5	5	5	5	5	5	5	5	5	4	4	1
Poland	1	2	3	22	1	1	1	1	1	3	3	3	3	3	1	1	1	1	1	1	1	1	1	3	3	3	3	3	3	3	3	3	3	3	3	3	3	3	3
Poland	1	2	4	23	1	4	4	3	3	3	4	4	3	3	4	3	2	4	3	4	3	3	3	3	4	3	3	4	3	3	4	3	3	2	2	3	2	2	2
Poland	1	1	3	20	1	3	.	3	3	4	3	4	4	1	3	3	3	3	1	3	.	3	3	4	5	5	4	5	5	5	5	5	5	5	5	5	3	4	4
Poland	2	2	1	26	1	5	5	5	5	4	.	5	5	5	5	5	5	4	4	4	.	4	4	2	4	4	4	5	5	.	5	4	4	4	4	4	4	4	2
Poland	1	1	3	20	1	.	.	.	.	4	4	4	4	3	4	.	.	4	.	.	.	.	.	3	4	4	4	5	5	5	5	5	5	5	5	5	4	3	1
Poland	1	2	3	23	2	2	2	3	3	3	3	3	4	5	2	2	2	2	2	2	2	2	2	3	2	2	4	4	3	3	3	3	2	2	3	3	1	1	1
Poland	1	1	2	21	2	.	.	.	.	4	4	4	4	4	3	.	2	2	3	.	.	.	.	3	4	4	4	5	5	5	5	5	5	5	.	5	4	3	1
Poland	1	1	4	21	2	.	.	.	.	5	5	4	3	4	4	3	.	3	.	.	.	.	.	2	3	2	.	5	5	5	5	4	3	3	4	3	1	4	1
Poland	1	2	3	22	1	3	3	3	3	2	2	2	4	4	2	2	3	2	2	.	.	2	.	1	4	4	.	5	5	5	5	5	5	5	5	5	1	1	1
Poland	1	2	3	22	1	4	4	4	.	5	5	4	4	3	.	3	.	4	4	4	2	.	4	4	3	3	3	5	5	5	5	4	4	4	4	3	2	2	1
Poland	1	2	3	21	2	.	.	.	.	4	4	4	4	4	3	.	.	4	3	4	4	3	3	3	3	2	3	4	3	2	3	4	4	3	4	3	3	2	1
Poland	1	1	4	23	2	.	.	.	.	5	2	2	1	3	3	4	.	5	.	4	2	.	.	2	2	4	4	5	5	2	5	5	5	5	5	5	3	3	1
Poland	1	1	4	20	1	2	2	2	2	3	3	2	2	2	4	3	3	2	2	2	3	2	3	3	2	4	5	5	4	5	2	4	4	5	5	5	1	1	.
Poland	1	1	2	21	2	.	.	5	.	4	4	.	3	3	3	4	4	3	2	3	.	.	.	4	3	3	2	5	5	4	5	4	4	3	5	4	3	1	1
Poland	2	2	3	43	1	2	.	.	.	4	4	4	4	3	3	2	3	4	4	4	3	3	3	3	3	2	2	5	3	3	3	4	3	4	4	3	3	2	2
Poland	1	2	3	23	2	.	.	2	2	4	4	4	4	4	3	2	1	2	1	2	.	.	.	4	4	3	5	3	4	3	2	4	4	4	4	2	1	5	1
Poland	1	2	3	24	2	.	.	.	.	4	2	1	1	1	1	1	1	2	1	2	1	1	1	1	1	1	1	5	3	3	3	4	4	1	4	3	4	3	3
Poland	1	1	1	22	1	5	5	.	.	5	5	5	5	5	5	5	5	5	5	5	5	5	5	5	5	5	5	4	4	4	4	4	4	4	4	4	6	6	6
Poland	1	1	2	20	2	4	3	.	.	4	4	4	4	3	4	3	3	4	4	4	2	4	4	2	3	3	2	5	5	5	5	4	4	3	4	4	4	4	2
Poland	1	1	4	21	2	1	5	3	3	5	5	5	5	5	5	3	4	4	3	3	1	3	2	3	3	3	3	5	2	1	1	5	3	5	5	2	5	4	2
Poland	1	2	2	23	2	4	4	3	3	3	4	3	3	3	.	4	4	4	4	3	1	4	3	4	3	3	3	4	3	2	3	3	3	4	4	4	1	1	1
Poland	1	1	4	23	1	.	.	.	.	2	3	2	3	1	4	1	.	2	1	3	3	.	2	2	2	2	2	5	3	3	1	5	4	1	5	2	2	2	1
Poland	1	2	2	23	2	.	3	3	.	3	3	4	3	3	4	4	4	3	3	3	3	3	3	2	3	3	3	5	5	5	5	3	3	4	4	3	2	2	2
Poland	2	1	3	21	1	3	3	3	4	2	3	4	2	4	2	3	2	4	3	5	3	3	3	4	3	2	4	2	3	4	4	3	3	3	3	3	5	4	3
Poland	1	1	3	21	2	.	.	.	.	4	2	5	2	4	5	4	3	4	4	.	5	3	.	2	2	2	4	5	5	5	5	5	4	4	4	4	5	3	1
Poland	1	2	2	23	2	.	2	.	.	4	1	2	3	1	4	3	.	2	2	2	2	3	2	2	3	4	3	5	4	5	3	5	3	3	5	5	2	1	1
Poland	2	2	1	28	2	.	3	.	.	1	1	2	3	1	1	1	1	1	1	1	3	2	.	2	3	3	3	4	4	4	4	5	4	4	4	4	2	1	2
Poland	1	1	3	21	2	5	5	5	5	5	5	5	5	5	5	5	5	.	.	.	.	.	.	3	3	3	3	5	5	5	5	5	5	5	5	5	2	1	1
Poland	1	2	3	23	2	.	.	.	.	5	3	4	4	2	5	3	5	5	5	5	.	5	.	4	5	5	5	5	5	5	5	5	5	5	5	4	4	1	1
Poland	1	2	3	22	2	5	.	5	.	3	4	3	4	2	3	3	4	4	3	.	3	.	.	4	5	3	3	5	4	5	3	4	4	4	5	4	6	4	1
Poland	1	2	3	22	2	.	.	.	.	4	4	4	3	1	3	3	.	3	3	3	4	.	.	2	3	2	3	5	5	5	4	5	5	5	5	5	2	4	1
Poland	1	2	3	24	2	4	4	4	4	4	4	4	4	2	4	4	4	4	4	4	4	4	4	3	4	2	.	5	5	5	5	4	4	4	4	4	6	3	1
Poland	1	2	3	23	2	.	.	4	.	3	2	3	1	1	3	1	3	1	2	2	3	3	.	.	4	3	.	5	4	2	2	4	4	4	4	4	5	1	1
Poland	1	1	3	21	2	3	3	.	4	3	2	3	3	4	4	3	2	3	2	5	4	3	3	3	3	2	3	4	3	3	4	4	4	4	4	3	6	3	2
Poland	1	1	2	21	1	.	4	.	.	3	4	4	5	4	4	4	5	4	.	.	.	5	4	3	4	4	3	4	5	5	5	5	5	5	5	4	4	4	2
Poland	1	2	3	23	2	.	.	.	.	4	3	3	4	4	3	1	3	3	.	.	5	3	.	2	2	1	2	5	5	5	5	4	5	5	5	5	4	4	1
Poland	1	1	4	21	1	.	.	.	.	3	3	3	4	3	3	3	3	4	4	3	3	4	3	3	4	4	3	5	5	5	5	4	4	4	4	4	1	1	1
Poland	1	1	4	21	1	.	.	4	.	3	2	4	4	3	4	5	.	3	2	.	3	.	.	2	5	4	3	5	5	5	5	5	5	5	5	4	5	4	1
Poland	1	1	4	20	2	.	.	.	.	3	3	4	2	3	2	1	2	2	3	3	2	3	3	4	3	2	4	5	4	5	5	4	3	4	4	3	.	1	1
Poland	1	1	3	19	2	4	4	4	4	5	4	5	5	2	4	4	4	4	4	.	4	4	.	3	4	3	.	5	3	5	4	5	5	4	5	4	.	.	.
Poland	1	2	3	24	1	4	.	.	.	4	.	4	5	5	5	5	5	4	3	4	4	5	.	4	4	2	5	5	5	5	5	5	5	5	5	5	6	5	2
Poland	1	2	4	23	1	4	.	4	.	5	2	4	4	1	4	4	4	4	4	3	4	5	5	2	3	2	2	5	5	5	5	5	5	5	5	5	6	4	2
Poland	2	2	1	24	2	3	3	3	3	4	4	4	3	4	3	2	2	4	3	3	.	3	.	3	4	4	3	5	3	3	3	4	4	2	5	3	4	3	1
Poland	1	3	3	21	2	4	4	4	4	3	4	4	4	2	5	2	2	5	3	3	.	.	.	2	3	1	2	5	5	5	5	4	4	5	5	4	4	3	1
Poland	1	1	4	22	2	4	.	.	.	4	2	4	.	1	4	4	3	3	3	.	4	.	.	3	4	2	4	5	5	5	5	5	5	5	5	5	6	3	2
Poland	1	2	3	23	1	5	5	5	5	5	5	5	5	5	5	5	5	4	3	.	3	4	3	3	5	2	2	5	5	5	5	5	5	5	5	5	3	6	1
Poland	1	2	3	.	2	3	3	.	.	3	3	4	3	1	4	3	3	3	.	.	.	.	.	2	3	2	2	5	2	2	5	4	4	3	3	3	4	2	1
Poland	1	1	3	31	2	.	.	.	.	4	4	4	3	4	2	1	3	1	2	2	1	4	3	3	2	2	4	5	5	1	1	4	3	2	4	3	2	2	1
Poland	1	2	3	24	2	3	4	4	4	4	4	4	4	4	4	4	4	3	3	4	3	4	3	4	4	4	3	5	4	4	5	4	3	5	5	3	5	4	3
Poland	1	2	3	24	1	.	4	.	.	4	3	3	4	3	3	3	2	4	4	.	.	.	.	3	5	3	3	5	4	5	5	5	5	4	5	4	4	4	2
Poland	1	1	2	21	2	3	3	.	.	4	3	3	3	4	4	4	.	3	3	3	4	.	3	2	4	4	4	5	5	5	5	4	3	4	5	3	1	4	1
Poland	1	1	3	21	2	1	1	.	.	2	2	3	2	4	2	2	2	3	2	3	2	3	3	2	2	2	2	5	3	3	3	4	4	4	4	4	2	2	1
Poland	1	3	3	21	2	4	4	5	5	.	.	.	.	3	3	3	3	4	4	4	5	5	5	.	.	.	.	5	5	5	3	3	4	3	3	3	5	5	5
Poland	1	1	2	23	2	3	3	3	3	5	4	3	3	2	4	3	.	4	.	4	3	4	.	4	3	3	3	5	5	5	5	5	4	5	5	4	1	4	1
Poland	1	1	2	20	2	.	.	.	.	3	1	.	4	3	2	4	.	3	4	.	2	.	.	3	3	3	3	5	5	5	5	5	5	5	5	5	4	5	.
Poland	1	1	3	21	2	4	4	4	4	5	4	.	3	4	4	3	3	3	3	3	3	3	3	4	3	3	3	5	4	5	5	4	4	4	4	4	5	3	1
Poland	2	2	3	24	1	3	3	3	3	2	4	2	2	4	5	5	5	4	3	5	2	3	2	5	4	5	5	5	3	5	5	3	3	2	5	4	5	2	3
Poland	1	1	4	22	2	.	4	.	4	5	4	4	4	5	4	.	3	4	4	3	4	3	.	3	5	5	4	5	5	5	5	5	5	5	5	5	5	2	1
Poland	1	1	2	20	2	3	3	4	2	4	4	4	4	5	3	4	4	4	4	3	3	4	3	4	4	3	3	5	5	5	5	4	4	5	5	4	4	3	2
Poland	1	1	2	21	2	4	3	4	3	4	5	4	3	4	4	4	3	4	3	5	4	4	4	5	2	2	2	5	4	4	4	3	3	4	4	3	1	1	1
Poland	1	2	2	22	2	4	3	.	.	3	3	4	3	1	2	.	3	3	.	.	.	.	.	4	3	3	3	5	4	5	5	4	4	4	5	3	1	1	1
Poland	1	1	2	20	2	3	3	3	3	2	4	4	4	4	3	3	3	3	3	3	3	3	3	4	2	2	2	4	3	5	3	3	3	5	3	3	2	2	1
Poland	1	1	2	20	2	3	3	.	.	4	4	3	3	4	3	3	3	3	3	3	2	3	3	3	4	4	3	4	4	5	3	4	4	5	5	5	3	4	2
Poland	1	1	2	20	2	2	1	2	3	4	2	2	4	3	2	2	3	3	3	3	2	4	3	1	3	3	3	4	4	3	2	2	3	4	1	4	3	1	1
Poland	1	1	3	22	2	3	3	3	3	3	3	3	4	3	4	2	3	3	2	3	3	3	3	3	3	3	3	4	4	4	4	4	4	3	3	3	4	3	2
Poland	1	1	4	21	2	.	.	.	.	4	3	4	4	3	4	3	3	3	3	3	2	3	3	2	2	2	3	5	4	4	3	4	4	4	4	2	2	2	1
Poland	1	2	3	21	2	.	.	3	.	4	2	2	2	2	3	3	2	4	.	.	2	.	.	4	3	4	3	5	5	5	4	3	2	5	5	3	4	3	1
Poland	1	1	3	20	2	.	4	.	4	4	2	4	3	2	4	3	.	4	3	3	3	3	3	3	4	4	3	5	4	5	5	4	4	4	4	4	4	4	1
Poland	1	1	3	20	2	1	2	5	4	4	2	5	2	1	4	.	1	4	2	1	.	.	1	3	3	1	1	5	4	5	5	4	3	3	5	2	1	4	2
Poland	1	1	3	23	2	.	.	.	.	5	4	4	2	2	1	3	4	2	5	3	4	4	4	4	4	5	4	3	4	4	4	5	5	5	5	5	4	3	2
Poland	1	1	3	21	1	.	.	4	.	3	3	3	3	2	4	4	5	4	2	2	4	5	3	1	3	4	4	5	4	4	5	5	5	4	4	4	3	3	2
Poland	1	2	2	23	2	3	3	.	.	3	4	.	4	4	2	2	.	3	4	.	3	.	.	2	3	2	2	5	4	5	5	4	4	5	5	4	4	1	1
Poland	1	2	3	23	2	4	.	4	.	4	4	4	4	3	4	4	.	3	.	.	3	3	3	2	3	4	4	5	2	5	5	5	5	4	5	4	4	4	1
Poland	1	2	3	24	1	3	3	1	.	2	2	2	1	1	2	1	1	1	3	5	1	5	4	2	2	2	5	5	3	5	5	4	4	4	4	5	4	3	1
Poland	1	1	3	22	2	.	.	.	.	4	3	2	2	2	2	2	.	2	4	.	.	.	.	2	2	3	3	5	3	5	4	3	3	3	4	3	4	3	1
Poland	1	2	3	20	2	.	.	.	.	3	4	4	4	4	3	4	.	4	3	3	3	4	4	3	4	3	4	5	5	5	5	3	4	4	4	4	4	2	1
Poland	1	2	3	22	1	.	.	.	.	4	3	4	4	4	4	4	.	4	4	4	4	.	3	4	5	4	3	5	4	5	5	5	5	5	5	5	6	5	1
Poland	1	1	2	22	2	.	5	.	4	4	4	4	5	2	2	2	3	4	4	3	1	3	3	2	3	2	3	5	5	5	5	5	5	5	5	5	4	4	1
Poland	1	1	2	21	1	.	.	.	.	4	4	4	3	2	3	2	.	3	4	.	.	.	.	3	4	2	3	5	5	5	5	5	4	3	5	4	4	1	1
Poland	1	2	4	23	1	.	.	4	.	.	4	4	5	5	4	4	4	4	4	4	4	4	4	2	5	4	5	5	4	5	5	4	4	4	4	4	2	3	2
Poland	1	1	4	20	2	4	4	4	4	5	4	4	4	4	5	3	.	4	.	3	3	3	3	4	4	3	3	4	4	4	3	3	2	3	5	3	5	3	1
Poland	1	2	2	25	2	4	3	4	4	5	4	5	4	2	5	4	.	5	5	.	4	4	4	2	5	4	5	5	5	5	5	5	5	4	5	5	4	3	1
Poland	1	2	2	24	1	2	2	2	2	4	1	1	1	1	1	2	2	2	3	2	2	3	3	4	3	3	2	5	5	5	5	4	5	5	5	5	3	2	2
Poland	1	1	2	20	1	.	.	.	.	4	4	3	5	4	4	.	4	4	1	3	3	3	3	4	4	4	4	5	4	5	5	4	4	4	4	4	4	3	1
Poland	1	1	2	21	2	.	.	.	.	3	2	2	3	1	3	.	.	3	.	.	.	.	.	2	5	4	4	5	5	5	5	5	5	5	5	5	2	5	1
Poland	1	1	1	22	2	3	3	3	3	5	5	3	2	1	4	3	3	3	3	3	2	3	3	5	4	4	3	5	4	5	5	4	4	3	4	3	3	2	1
Poland	1	1	2	21	2	.	.	.	.	4	3	2	3	4	4	4	.	2	3	4	2	.	3	.	4	.	4	4	5	5	5	5	4	5	5	5	2	2	1
Poland	1	2	2	25	2	4	4	3	2	4	1	2	4	3	2	2	2	2	3	3	4	3	3	1	1	3	2	5	5	5	5	3	3	4	3	3	6	2	1
Poland	2	1	2	21	2	4	.	4	.	4	3	3	3	2	4	4	3	3	2	3	2	3	.	3	3	3	3	5	5	3	1	4	4	3	4	3	2	4	1
Poland	1	1	2	20	2	3	3	3	3	3	4	4	4	3	4	.	3	4	3	4	3	3	3	3	4	3	3	5	4	5	5	4	3	4	4	4	3	2	1
Poland	1	2	4	23	1	2	2	3	3	5	3	4	4	3	4	3	3	.	.	.	5	.	.	3	3	2	3	5	5	4	4	3	3	4	3	3	6	4	1
Poland	2	1	2	20	2	3	3	.	.	3	3	4	3	5	3	.	.	3	3	.	.	3	2	4	3	2	2	5	5	4	3	3	3	3	3	3	.	.	.
Poland	1	2	2	21	2	5	5	5	5	5	5	5	5	3	5	5	5	5	5	5	5	5	5	4	5	5	5	5	5	5	5	5	5	5	5	5	5	5	1
Poland	1	2	2	20	1	3	2	2	2	5	4	3	2	2	1	2	2	2	1	3	4	3	3	1	2	4	2	5	5	5	5	5	5	4	5	5	6	5	1
Poland	1	1	2	21	2	5	5	5	5	5	5	5	5	2	5	5	5	5	5	5	5	5	.	5	5	5	5	5	5	5	5	5	5	5	5	5	6	4	1
Poland	1	1	2	22	2	.	.	.	.	4	5	5	5	4	.	4	.	4	3	.	.	.	.	3	3	3	3	5	4	5	5	4	4	5	5	4	1	1	1
Poland	2	2	2	23	1	2	2	1	2	2	2	3	2	3	2	2	2	2	1	2	2	2	2	2	3	3	3	5	5	5	5	5	4	5	5	5	4	2	1
Poland	1	1	2	21	2	5	5	5	5	5	5	5	5	5	5	5	4	5	4	4	3	4	4	4	5	4	4	5	4	5	5	4	4	5	5	4	1	2	2
Poland	1	2	2	23	2	.	4	.	.	5	5	5	5	5	5	5	5	5	5	5	5	5	5	4	5	5	5	5	5	5	5	5	.	4	5	5	3	3	3
Poland	1	2	2	23	2	1	1	.	.	1	1	1	2	3	3	1	1	1	1	1	1	.	1	1	2	2	2	5	3	2	4	4	4	2	5	2	2	2	1
Poland	2	1	2	19	2	3	4	3	4	4	4	4	4	4	3	3	3	3	4	3	3	3	3	4	3	3	3	4	4	5	4	3	3	3	4	3	3	3	3
Poland	1	2	2	24	1	3	3	3	3	4	4	3	3	2	3	3	3	2	3	3	1	3	3	2	4	3	3	5	4	4	4	4	4	4	4	4	3	3	3
Poland	1	2	2	24	1	4	4	4	4	3	3	4	4	4	2	4	3	3	4	3	2	4	4	3	2	3	4	5	4	4	5	5	5	4	5	4	3	3	2
Poland	1	1	2	21	2	4	3	4	3	4	4	4	4	4	4	3	4	4	3	3	3	3	3	4	4	3	3	4	4	4	4	4	4	4	4	4	2	1	1
Poland	1	1	2	20	2	3	.	.	.	3	3	3	4	3	3	.	.	3	3	3	3	.	.	2	3	3	3	4	3	5	5	3	3	4	4	3	1	2	1
Poland	1	1	2	21	2	3	3	4	4	3	3	5	4	5	3	3	3	3	3	3	2	3	3	4	3	4	3	5	5	5	5	3	3	4	4	4	1	1	1
Poland	1	2	2	23	1	3	3	3	3	4	4	4	4	3	3	4	3	4	3	3	2	.	3	3	3	3	3	5	4	3	2	5	5	5	5	5	2	3	2
Poland	1	1	2	20	2	.	.	.	.	4	5	4	3	2	2	.	.	3	4	.	2	3	.	2	2	2	2	5	4	5	5	4	4	4	4	4	1	1	1
Poland	2	2	2	21	1	.	.	.	.	5	5	5	5	5	.	.	.	5	5	.	2	.	.	3	5	5	5	5	5	5	5	5	5	5	5	5	5	3	1
Poland	2	1	2	20	2	1	1	1	1	1	1	1	1	1	1	1	1	1	1	1	1	1	1	1	1	1	1	5	1	3	1	1	1	1	1	1	1	1	1
Poland	1	1	2	22	2	4	3	3	3	3	4	4	3	2	3	4	.	4	.	.	4	.	.	2	3	4	4	5	3	4	1	4	4	4	4	4	4	1	1
Poland	1	1	3	21	2	4	.	.	.	4	2	2	3	3	3	2	.	2	4	.	4	2	.	2	3	3	3	5	5	5	5	4	4	4	3	5	4	3	1
Poland	1	2	1	23	2	3	3	.	3	3	3	3	4	4	3	3	4	3	3	3	3	3	3	3	3	3	3	5	5	2	4	3	3	4	4	3	4	4	4
Poland	2	1	2	20	2	3	3	4	4	4	4	4	5	5	5	5	5	5	5	.	3	5	4	5	4	4	3	5	5	5	5	4	4	5	5	4	1	5	4
Poland	1	2	2	20	2	2	2	3	3	3	2	4	2	1	2	2	3	1	2	2	2	3	3	2	3	3	2	5	3	4	1	3	4	2	4	3	2	1	1
Poland	1	1	2	21	2	.	.	.	.	2	3	2	3	1	4	.	.	3	3	.	.	.	.	2	4	2	1	5	4	4	4	4	3	4	4	3	2	4	1
Poland	1	1	2	22	1	.	.	.	.	2	2	2	5	5	5	5	5	5	5	5	5	5	5	3	3	3	3	3	3	3	3	3	3	3	3	3	3	3	3
Poland	1	1	2	20	2	.	.	.	.	4	3	2	1	1	2	2	2	2	3	.	.	3	.	1	2	2	2	5	4	3	3	4	4	4	4	4	6	5	1
Poland	1	1	2	21	2	4	4	3	3	4	4	4	4	4	4	4	4	4	4	4	3	4	4	3	5	3	3	5	5	5	5	4	4	4	5	4	4	3	1
Poland	1	2	2	28	2	3	3	3	3	5	5	5	5	5	4	4	.	5	.	5	.	.	.	2	4	2	2	5	5	5	5	4	4	4	4	4	4	3	1
Poland	1	.	2	22	2	5	4	4	3	4	3	4	5	5	3	3	3	4	4	3	4	3	4	4	5	4	5	5	3	2	2	4	3	4	5	2	1	1	1
Poland	1	2	2	23	2	2	2	4	2	4	4	4	4	4	4	5	5	3	5	4	3	4	3	4	3	3	3	5	5	5	5	4	4	2	4	2	6	6	6
Poland	2	2	1	33	2	5	.	4	.	3	3	2	4	4	3	4	3	3	2	3	.	3	2	1	3	2	2	5	5	5	5	4	3	3	4	3	4	2	2
Poland	1	1	2	20	2	.	.	3	.	3	2	3	4	4	3	2	2	3	4	3	4	3	3	2	3	3	3	5	2	5	5	5	5	5	5	4	5	5	1
Poland	1	1	1	23	2	.	.	.	.	5	4	4	4	4	4	3	.	4	4	.	1	.	.	4	5	5	4	5	4	5	5	5	5	5	5	5	3	3	1
Poland	1	1	2	21	2	1	1	.	.	5	3	4	3	2	1	4	.	3	2	.	4	.	.	.	4	3	3	5	5	5	5	5	4	5	5	4	5	3	1
Poland	1	2	2	22	1	3	3	3	3	2	2	3	4	1	2	.	3	1	1	1	3	3	3	3	3	3	3	5	4	1	1	3	3	3	4	3	2	2	2
Poland	1	1	2	20	2	.	.	.	.	3	3	3	3	2	2	3	3	2	4	3	2	3	3	3	4	2	3	5	4	5	5	5	4	4	5	4	5	4	1
Poland	1	1	2	22	2	.	.	.	.	2	2	.	.	1	1	1	1	1	1	1	.	1	1	2	4	1	1	5	5	4	2	5	4	4	5	4	4	2	1
Poland	1	1	2	20	2	.	5	.	.	5	4	4	5	5	5	.	.	4	4	5	5	.	.	3	5	4	2	5	5	5	5	5	5	5	5	4	6	3	2
Poland	1	1	4	20	2	3	.	3	.	5	5	5	4	3	4	4	.	3	3	3	.	.	.	2	3	3	3	5	5	5	5	4	4	4	4	3	3	3	3
Poland	1	2	2	23	2	.	.	.	.	4	4	4	2	4	2	3	3	3	2	3	3	3	4	2	2	2	4	3	2	2	4	4	3	3	4	3	2	4	2
Poland	1	2	2	20	2	3	3	3	3	2	2	2	2	2	3	3	3	2	2	3	2	3	3	2	3	2	2	4	2	2	1	4	3	3	4	3	6	3	2
Poland	1	2	2	20	2	.	.	.	.	2	2	3	3	1	2	2	.	3	3	3	1	3	3	3	1	3	2	5	4	5	5	3	4	4	3	3	6	3	1
Poland	1	1	1	20	2	1	1	1	1	2	3	4	3	2	2	2	2	2	3	2	2	2	2	1	3	2	1	5	5	5	5	4	2	3	4	2	5	1	1
Poland	1	2	2	24	1	2	2	.	.	4	4	3	1	5	5	5	5	4	5	5	2	3	3	4	4	4	3	5	5	4	3	3	4	1	4	4	1	1	1
Poland	1	2	3	25	2	3	3	3	3	4	2	3	3	2	4	2	2	3	2	3	4	3	3	4	4	2	4	5	4	4	4	5	3	3	4	4	4	1	1
Poland	1	1	1	21	2	4	4	4	4	.	5	4	4	2	3	3	4	3	3	.	.	3	3	1	1	4	2	5	4	2	2	5	5	5	5	5	2	3	1
Poland	1	2	2	24	2	3	3	3	3	3	3	3	3	3	3	3	3	3	3	3	3	3	3	.	3	3	3	5	3	3	2	3	3	3	3	3	.	.	.
Poland	1	1	4	21	2	.	.	.	.	1	1	1	1	1	1	1	1	1	1	1	1	1	1	1	1	1	1	5	5	5	5	5	5	5	5	5	6	2	1
Poland	1	2	2	23	2	4	4	.	.	4	4	4	4	3	4	4	4	4	5	4	4	4	4	3	5	4	4	5	5	5	5	4	4	5	5	4	6	1	2
Poland	1	1	2	20	2	.	.	.	3	2	1	3	4	2	2	.	2	2	3	3	.	.	.	2	3	2	4	5	4	5	5	5	5	4	5	3	4	4	1
Poland	1	2	1	24	2	.	.	.	.	3	4	4	4	4	3	3	3	3	3	4	3	4	4	4	4	4	4	5	5	5	4	4	4	4	4	4	2	3	1
Poland	2	1	2	24	2	4	4	4	4	2	2	4	4	4	3	4	3	4	4	.	3	.	3	.	3	4	3	5	5	5	5	4	4	4	5	4	4	3	1
Poland	1	1	2	21	1	2	4	3	3	.	3	4	2	4	2	3	4	2	2	3	2	4	3	1	4	4	4	5	4	3	4	4	4	4	4	4	1	4	1
Poland	1	1	2	21	2	.	.	.	.	5	5	5	5	5	5	5	5	4	4	4	1	4	4	3	1	1	5	5	5	5	5	5	5	5	5	5	1	3	1
Poland	1	1	1	20	2	4	4	4	4	3	4	2	3	2	5	4	3	3	4	4	2	3	3	4	3	3	4	4	3	4	1	2	3	4	4	3	4	5	3
Poland	1	1	2	23	2	.	.	.	.	4	3	4	3	3	3	3	.	4	4	.	5	4	4	2	3	3	3	5	4	5	5	3	3	4	5	3	5	4	3
Poland	1	3	1	26	2	3	.	.	.	3	4	3	4	1	3	2	3	3	2	3	1	3	3	2	4	4	2	5	3	4	5	4	4	3	5	3	4	2	1
Poland	1	1	2	21	2	.	.	.	.	4	1	2	3	3	3	2	.	3	3	3	.	.	.	1	1	2	3	5	3	5	5	.	4	4	4	4	4	3	1
Poland	1	2	2	24	2	.	.	.	.	3	3	.	3	3	4	3	3	4	.	.	2	.	.	3	4	3	4	5	5	5	5	4	3	4	4	2	1	1	1
Poland	1	2	2	23	2	4	5	3	3	5	4	4	5	4	5	5	4	5	4	4	3	3	4	4	5	3	4	5	4	5	5	5	5	2	5	4	4	3	1
Poland	1	1	2	21	2	3	3	3	3	4	4	4	4	4	4	4	4	4	4	4	4	4	4	3	4	3	3	5	5	5	5	4	4	4	4	4	6	4	3
Poland	2	2	2	24	2	2	2	2	3	4	4	4	3	5	2	2	2	2	4	4	2	3	3	2	1	2	2	5	4	4	5	4	3	2	5	2	5	2	1
Poland	1	2	1	20	2	3	3	4	3	5	4	3	3	1	5	4	3	5	4	3	4	4	4	3	3	3	3	4	4	4	4	4	4	4	3	4	3	4	5
Poland	1	1	1	23	2	1	5	.	.	4	3	3	1	5	.	1	4	.	.	2	3	.	3	.	3	4	4	5	4	3	2	4	4	4	4	4	1	1	2
Poland	1	1	2	22	2	5	5	5	5	4	4	4	4	4	4	4	.	4	5	3	2	3	3	3	3	3	3	5	4	5	4	4	4	3	4	.	.	1	1
Poland	1	2	2	25	2	4	4	.	.	1	4	4	1	1	1	5	2	2	5	3	1	3	3	2	4	4	2	5	5	4	5	3	4	3	4	3	2	2	1
Poland	1	1	2	22	2	.	.	.	.	4	3	4	4	4	4	4	3	3	.	.	1	3	3	4	4	4	4	5	4	2	2	2	2	4	4	4	1	1	1
Poland	2	1	2	21	2	.	.	.	.	4	4	4	4	3	3	.	4	3	3	.	.	4	.	2	2	2	2	5	5	5	5	3	3	4	5	3	.	.	.
Poland	1	1	2	21	2	3	3	.	.	4	4	4	4	4	4	4	4	4	4	4	3	4	4	3	5	4	2	5	5	5	5	5	5	5	5	5	1	1	1
Poland	1	2	2	24	2	.	.	.	.	4	5	4	4	4	4	4	5	4	3	.	.	3	3	.	4	4	3	5	4	5	5	4	3	3	5	3	3	3	1
Poland	1	1	3	28	2	.	.	.	.	4	4	4	3	1	5	2	4	4	2	3	3	4	3	3	4	3	4	5	4	3	4	3	3	3	3	2	4	1	1
Poland	1	1	2	22	2	3	3	3	3	4	4	4	5	4	4	4	.	5	3	3	2	3	3	4	4	4	4	5	4	5	5	4	3	4	5	4	3	1	1
Poland	1	2	2	23	2	3	2	3	3	5	5	4	4	4	4	4	.	4	4	4	2	3	4	4	3	1	1	5	5	5	5	5	4	4	4	4	1	1	1
Poland	1	1	2	22	2	.	.	.	.	4	4	5	4	3	4	.	3	4	4	.	.	4	.	3	4	4	4	5	5	5	5	5	5	5	5	5	2	4	1
Poland	1	1	2	23	1	3	3	3	3	4	4	4	4	4	4	4	.	4	4	5	4	4	4	5	4	4	3	5	5	4	1	5	4	3	5	4	4	4	3
Poland	1	2	4	23	2	2	2	3	3	2	3	4	4	5	2	3	4	5	5	4	4	3	3	4	4	3	3	5	5	5	5	4	4	5	4	4	4	4	1
Poland	1	2	2	29	2	.	.	.	.	5	4	5	5	4	5	4	5	5	.	.	.	4	3	3	5	4	4	5	5	5	5	5	5	4	5	5	2	2	1
Poland	1	1	2	20	2	5	5	5	5	4	4	4	4	2	2	3	3	3	3	3	3	3	3	3	3	3	3	5	5	4	4	3	3	3	3	3	.	.	.
Poland	1	2	2	23	2	2	4	1	3	2	3	4	3	3	1	1	1	1	2	2	4	3	3	4	4	4	4	5	5	5	5	3	4	4	5	5	4	4	2
Poland	2	2	2	25	2	.	.	.	.	4	3	4	4	4	3	2	3	4	3	.	3	.	.	2	4	4	3	5	4	4	4	4	3	4	4	4	4	2	1
Poland	1	2	2	23	2	2	2	2	2	3	3	.	4	2	3	3	4	4	3	4	5	4	4	.	2	.	.	5	4	5	5	3	3	4	3	3	3	4	1
Poland	1	1	2	25	1	.	.	.	.	3	3	2	2	2	2	2	2	2	3	.	1	2	2	3	2	3	3	5	5	5	5	4	4	4	4	4	4	3	1
Poland	1	1	2	21	2	.	.	.	.	2	2	3	3	3	3	3	.	3	4	.	.	.	.	1	2	3	4	5	3	5	5	4	3	3	5	3	3	2	1
Poland	1	1	2	20	2	5	5	5	5	5	4	4	3	5	4	4	3	5	4	4	5	4	3	3	4	4	4	5	5	5	5	5	5	4	.	4	6	6	2
Poland	1	1	2	19	1	.	.	.	.	3	3	3	4	4	3	4	.	4	3	.	.	.	.	4	3	4	3	5	5	5	5	4	4	5	5	4	6	3	1
Poland	1	1	2	22	1	.	.	.	.	3	3	4	3	3	3	3	3	3	.	.	.	.	.	3	3	3	3	5	5	5	5	5	4	4	5	4	3	3	1
Poland	1	1	1	24	2	4	3	4	2	3	2	3	1	1	2	2	2	2	2	2	1	2	2	1	1	1	1	5	4	4	5	5	5	4	4	4	1	1	1
Poland	2	1	2	25	1	.	.	.	.	4	3	3	4	4	3	3	3	3	2	.	.	3	4	2	2	2	2	2	2	1	1	3	3	2	2	2	4	4	3
Poland	1	2	2	24	2	4	4	3	3	4	2	1	1	2	4	3	.	2	.	.	1	.	.	2	2	2	2	5	4	5	5	4	.	3	4	4	1	3	1
Poland	1	1	2	20	2	4	4	3	4	4	2	3	4	4	4	4	3	2	3	2	.	.	.	3	4	4	4	4	3	3	2	4	4	4	4	4	5	4	2
Poland	1	1	1	20	2	4	4	4	4	4	4	4	4	5	4	4	4	5	4	4	3	5	4	2	5	4	3	5	5	5	5	4	5	5	5	5	4	3	2
Poland	1	1	2	20	2	3	5	.	5	4	4	5	5	2	5	4	.	5	.	.	.	.	.	3	4	4	4	5	5	5	5	4	4	5	5	5	1	1	1
Poland	1	2	2	25	2	3	3	3	3	5	4	5	5	5	4	4	4	4	3	3	3	.	3	3	3	4	3	5	5	4	3	4	3	5	5	5	2	4	2
Poland	1	2	2	24	2	.	.	.	.	3	4	4	4	4	4	4	4	4	4	3	4	.	.	.	4	4	4	5	5	5	5	4	.	4	4	4	4	4	2
Poland	1	1	2	20	2	.	.	.	.	4	4	4	3	4	4	3	.	3	.	.	3	.	.	3	4	4	.	5	5	4	4	3	3	3	3	3	6	2	1
Poland	1	1	1	23	2	3	3	3	3	5	4	3	4	3	2	2	.	3	3	3	.	4	.	2	3	3	3	5	4	4	5	4	4	4	4	4	.	.	.
Poland	2	2	2	36	2	.	.	.	.	3	3	4	4	2	3	2	3	4	3	2	2	3	3	2	3	3	2	5	5	5	5	5	5	5	5	5	2	2	2
Poland	1	1	2	21	2	.	.	.	.	3	2	3	3	1	4	3	3	3	3	3	3	3	3	5	4	4	3	5	4	2	1	4	3	3	4	3	1	1	1
Poland	1	2	2	24	1	5	5	.	.	4	4	3	3	2	4	.	3	3	3	3	2	3	3	3	2	5	4	5	5	5	5	5	5	5	5	5	1	1	1
Poland	1	1	1	30	2	3	3	3	3	3	3	3	3	3	3	3	3	3	3	3	3	3	3	3	3	3	3	2	2	3	2	4	4	4	4	3	.	.	.
Poland	1	1	2	20	2	5	.	5	5	4	2	4	3	4	4	4	.	4	5	.	.	.	.	1	5	5	5	5	4	5	5	5	5	3	3	4	5	5	1
Poland	1	1	3	20	2	4	3	3	3	4	4	4	5	3	4	4	4	4	2	3	4	4	4	4	3	2	3	5	5	5	4	5	3	4	4	4	1	1	1
Poland	1	1	2	23	2	2	2	.	.	2	3	3	3	4	2	4	3	3	.	.	2	.	.	3	3	3	3	4	4	3	2	4	4	4	4	4	1	2	1
Poland	1	1	1	23	2	3	3	3	4	4	4	2	4	4	3	4	.	.	.	.	.	.	.	2	3	3	3	5	4	5	5	4	4	4	4	4	6	4	1
Poland	1	1	1	24	2	1	2	.	.	3	2	4	3	1	1	3	3	2	.	.	2	3	.	2	1	1	2	5	5	4	5	5	4	2	5	3	4	2	1
Poland	1	2	4	24	2	.	.	.	.	5	2	3	3	2	4	3	.	4	.	.	.	.	.	3	4	4	2	5	5	5	1	5	5	4	5	4	1	2	1
Poland	1	1	1	20	1	3	4	3	4	4	4	4	4	4	4	4	4	4	4	.	.	.	.	3	4	3	3	5	5	5	5	4	4	4	4	4	3	4	1
Poland	1	2	2	24	2	5	.	5	.	4	4	4	3	4	4	4	3	4	3	4	3	.	.	3	4	4	3	5	4	4	2	4	4	4	4	2	2	1	1
Poland	1	1	4	21	1	.	.	.	.	1	1	3	4	3	1	4	.	3	4	3	2	3	3	1	1	1	2	5	5	5	5	4	4	4	4	4	5	2	1
Poland	1	2	2	24	2	5	5	5	5	4	4	4	4	4	5	5	5	5	5	5	5	5	5	5	5	4	4	5	5	5	3	4	4	5	5	5	6	1	1
Poland	1	1	4	22	2	4	4	.	.	4	5	4	4	2	3	3	3	3	2	.	.	4	4	2	3	4	3	4	4	5	2	4	4	3	4	2	4	3	1
Poland	1	1	4	20	2	5	.	5	.	2	3	2	3	2	3	.	.	3	3	2	.	4	2	3	2	2	1	5	5	5	5	5	5	5	5	5	6	3	1
Poland	1	2	2	23	2	3	3	.	.	.	.	4	4	2	3	3	.	3	.	.	3	.	.	3	4	4	4	5	5	5	2	5	4	4	5	4	1	3	1
Poland	1	2	2	23	1	.	4	3	3	2	2	4	3	2	2	2	3	4	4	3	.	3	3	2	2	2	3	5	5	5	5	5	5	4	4	4	1	3	1
Poland	1	2	2	23	2	.	.	.	.	4	4	4	4	2	4	4	4	4	4	.	5	.	.	3	4	4	4	4	2	4	4	4	4	4	4	4	4	3	3
Poland	1	2	1	25	2	4	3	3	3	3	1	2	2	1	3	3	3	3	3	3	.	3	4	3	3	3	3	5	5	5	5	2	2	1	1	1	4	4	3
Poland	1	2	2	19	2	3	3	3	3	2	2	3	2	3	3	.	3	2	4	4	3	2	2	2	1	3	3	5	5	5	5	4	4	5	4	5	4	3	1
Poland	1	1	4	22	2	.	.	.	.	2	3	2	3	1	3	.	3	3	2	2	3	3	3	2	4	2	3	5	5	2	5	3	2	2	4	2	6	4	1
Poland	1	1	2	21	2	3	3	.	3	3	4	4	3	3	1	2	2	2	2	3	1	2	2	3	3	2	.	5	5	5	5	2	2	2	3	3	3	3	1
Poland	1	2	4	23	1	.	.	.	.	4	4	4	4	2	4	4	.	4	.	4	.	.	.	4	4	4	4	5	5	5	5	5	5	5	5	5	4	3	2
Poland	1	1	2	23	2	.	.	.	.	4	4	4	4	.	3	3	3	3	.	.	.	.	.	3	4	3	2	5	3	1	5	4	4	3	4	4	3	2	1
Poland	1	2	2	21	1	5	5	5	5	5	3	5	3	2	2	.	.	4	4	3	1	.	.	3	5	5	5	5	5	5	5	5	5	5	5	5	.	.	.
Poland	1	1	1	21	2	.	5	3	5	2	3	3	2	3	4	3	3	2	4	.	.	3	.	4	4	4	4	5	4	5	5	4	1	4	4	4	5	3	1
Poland	1	2	2	23	2	.	.	.	.	3	2	2	2	2	2	.	.	3	2	3	3	.	.	2	3	4	3	5	5	5	5	3	3	3	3	3	4	2	1
Poland	1	2	2	20	2	.	5	.	5	5	4	5	5	3	3	.	.	3	3	.	.	.	.	2	3	3	2	5	4	5	5	5	4	3	4	3	4	4	1
Poland	1	2	4	34	2	.	.	.	.	4	3	4	3	2	3	3	4	3	3	3	3	3	3	3	5	3	2	5	5	4	4	5	5	4	5	4	5	3	2
Poland	1	1	1	38	1	.	2	.	2	4	1	4	3	2	1	1	.	4	2	3	.	.	3	1	1	1	1	5	5	5	5	5	5	5	5	5	1	2	1
Poland	1	2	1	23	2	5	.	5	5	5	5	5	5	5	5	5	.	5	5	5	5	.	5	3	4	4	4	5	5	5	5	4	4	4	4	4	4	4	2
Poland	1	2	2	23	2	1	1	1	1	4	1	.	2	1	1	2	3	2	.	.	1	3	.	1	2	2	2	5	2	1	1	4	3	2	4	3	3	1	1
Poland	1	1	1	20	2	2	2	.	.	5	4	3	3	3	3	4	3	3	4	4	3	3	3	2	2	4	3	5	4	2	2	4	3	5	4	5	.	.	.
Poland	1	1	2	22	2	2	2	.	.	3	2	2	2	1	3	.	.	3	3	3	3	3	3	3	2	4	4	3	3	5	5	4	3	5	3	5	6	1	1
Poland	1	1	1	22	1	.	.	.	.	4	4	.	3	.	4	4	.	4	4	.	.	.	.	3	5	4	4	5	5	5	5	5	5	5	5	5	4	3	1
Poland	1	1	2	20	2	5	.	5	.	4	4	5	5	4	3	2	.	3	4	4	.	3	4	3	1	2	1	5	5	4	4	5	4	4	4	3	6	3	1
Poland	1	1	3	23	1	.	.	.	.	3	2	1	2	1	1	1	1	1	1	1	3	1	1	2	4	.	.	5	5	5	5	5	5	5	5	5	5	3	1
Poland	1	1	1	22	2	4	4	.	.	5	4	3	4	3	5	4	5	.	.	.	.	.	.	2	3	4	4	5	5	5	5	3	3	3	4	3	1	2	1
Poland	1	1	4	21	1	4	4	4	4	2	2	2	2	4	1	3	2	2	4	.	4	.	.	1	3	2	1	5	4	5	3	5	5	4	4	4	4	3	2
Poland	1	2	1	24	2	.	.	.	.	4	4	4	4	3	4	4	4	4	3	.	2	.	.	5	5	5	5	5	3	5	5	5	5	4	5	4	3	4	1
Poland	1	1	2	21	2	.	.	.	.	4	3	2	2	4	2	2	2	2	2	3	1	3	2	2	4	2	2	5	4	5	5	4	3	4	4	1	5	3	1
Poland	1	2	1	25	2	3	3	.	.	2	5	.	.	3	3	4	4	3	2	.	3	3	.	.	2	2	4	5	3	5	5	2	2	4	4	4	2	1	1
Poland	1	1	1	21	2	.	5	.	.	4	3	4	3	3	3	2	.	2	3	.	.	.	.	2	2	2	3	5	5	5	5	4	4	4	5	4	4	1	1
Poland	1	1	2	21	2	3	.	.	.	4	2	.	3	1	2	2	3	2	3	.	3	3	3	2	2	2	2	5	5	5	5	4	4	4	4	4	5	3	1
Poland	1	1	2	20	2	.	.	.	.	3	2	3	3	1	3	4	.	.	.	.	.	.	.	3	4	4	2	5	4	5	3	4	3	4	5	3	6	3	1
Poland	1	1	2	20	2	3	3	.	.	2	1	3	4	3	3	3	.	3	3	.	.	.	.	3	3	3	2	5	4	5	5	4	4	4	4	4	5	3	1
Poland	1	1	2	22	2	4	4	4	3	4	3	3	3	3	3	3	3	3	4	4	4	4	4	4	3	3	3	5	5	5	4	3	3	3	3	3	4	5	3
Poland	1	1	1	19	2	3	3	3	3	3	3	4	3	3	3	3	3	3	3	.	.	4	3	3	3	3	2	5	5	5	5	4	4	4	4	3	6	6	1
Poland	1	2	4	23	2	.	.	.	.	5	3	4	4	4	3	2	3	4	3	2	5	4	.	2	3	2	2	5	4	5	5	4	4	3	4	4	6	3	2
Poland	1	1	1	20	1	.	.	.	.	3	4	4	4	3	3	4	3	4	3	4	3	4	3	2	4	3	3	5	4	5	1	5	4	4	5	4	.	.	.
Poland	1	2	4	24	2	2	3	.	.	4	2	3	2	3	2	2	3	2	3	2	2	2	2	2	2	3	2	5	4	3	3	5	5	5	5	5	4	2	1
Poland	1	3	2	25	2	3	3	2	3	2	2	3	3	3	1	3	3	2	2	2	3	3	4	3	3	3	3	3	3	3	1	2	2	3	3	3	2	4	4
Poland	1	1	1	21	2	1	3	2	3	1	3	2	3	3	1	2	3	2	3	3	4	2	3	1	1	1	1	5	5	5	2	5	5	4	5	3	4	4	1
Poland	1	1	1	69	2	.	.	.	.	5	5	5	5	5	4	2	2	4	3	3	4	.	.	2	4	4	4	5	3	5	5	4	4	4	4	4	3	4	1
Poland	1	1	1	20	2	4	3	.	.	4	3	.	2	4	2	3	3	2	4	3	.	4	.	3	3	3	3	4	2	3	1	4	3	5	5	2	1	1	1
Poland	1	2	2	20	2	.	.	.	.	5	4	4	4	3	5	4	.	5	4	3	4	.	4	3	5	5	5	5	5	5	5	5	5	5	5	5	6	5	3
Poland	1	1	2	20	2	4	4	.	4	4	2	4	3	5	3	3	.	5	4	.	.	4	.	2	2	2	4	5	5	.	5	4	4	5	5	5	3	3	1
Poland	1	1	1	21	2	3	4	4	4	4	4	4	5	3	3	3	3	3	3	3	2	3	3	2	2	3	2	5	5	5	5	3	3	2	2	3	1	1	1
Poland	1	1	2	23	2	.	.	.	.	2	1	3	4	3	3	3	3	2	4	.	2	.	.	2	4	3	3	5	4	4	4	5	5	4	4	4	6	4	1
Poland	1	2	1	23	2	.	.	.	.	.	4	4	.	1	.	.	4	4	.	.	1	3	.	2	4	4	4	5	5	5	5	4	4	1	5	5	2	1	1
Poland	1	2	1	24	2	4	3	4	4	4	4	4	4	2	3	3	3	3	4	3	3	4	4	4	5	4	4	5	4	4	4	4	4	4	4	4	.	.	.
Poland	1	2	4	42	2	.	.	.	.	4	4	4	4	4	3	3	3	3	3	3	2	3	3	3	4	4	4	4	2	3	4	4	2	3	4	2	.	.	.
Poland	1	1	4	23	2	4	3	4	4	5	5	5	5	5	4	3	3	5	4	.	4	5	5	3	4	3	2	5	2	4	3	2	4	2	1	3	5	5	2
Poland	1	1	1	20	2	2	3	.	.	4	4	3	2	1	4	4	.	2	2	.	.	2	.	1	3	2	4	5	4	5	2	4	4	4	4	4	6	4	1
Poland	1	1	4	21	2	.	.	.	.	3	2	5	3	4	3	2	.	3	3	.	.	.	.	2	3	3	1	5	3	5	1	4	4	4	4	3	6	2	1
Poland	1	1	3	21	2	3	3	3	3	3	3	3	3	3	4	4	4	4	4	4	3	3	3	3	3	3	3	4	4	4	4	3	3	3	3	3	3	3	3
Poland	1	1	4	23	1	4	5	5	5	5	5	5	5	5	4	4	4	4	5	.	.	.	.	5	5	5	4	2	1	2	2	2	3	5	5	5	6	2	2
Poland	1	2	1	24	1	.	.	.	.	5	3	4	3	2	2	4	4	4	4	.	4	4	.	4	4	4	3	5	5	5	5	5	4	4	5	4	5	3	1
Poland	1	2	1	23	2	.	.	.	.	4	2	4	3	2	2	3	4	3	2	3	3	3	.	1	2	3	2	5	4	5	5	4	3	3	4	2	3	4	1
Poland	1	2	4	24	1	3	2	3	.	4	4	3	4	4	3	4	4	3	3	3	2	2	4	3	4	4	2	5	4	3	.	4	4	4	4	4	2	2	1
Poland	1	2	2	24	2	4	4	.	.	4	3	2	4	4	4	5	2	2	4	2	3	.	3	3	4	5	3	5	4	5	4	5	4	4	5	1	2	1	1
Poland	1	1	2	25	1	1	1	1	1	5	3	2	1	2	1	1	1	2	3	3	.	1	1	1	1	1	1	5	2	1	1	5	5	1	5	2	4	2	1
Poland	1	1	2	18	2	3	4	.	.	5	4	4	5	4	4	3	4	4	4	1	2	3	3	5	4	5	4	5	4	5	5	5	4	5	5	3	4	4	1
Poland	1	1	2	20	1	3	4	3	4	4	2	3	4	4	3	3	.	3	3	3	3	3	4	3	4	4	3	5	5	5	1	5	4	4	4	4	3	2	1
Poland	1	2	1	23	2	3	2	3	2	3	2	3	3	3	3	4	.	3	2	3	3	3	3	5	3	3	3	5	3	5	5	4	3	3	4	3	4	4	1
Poland	1	2	4	23	2	.	.	.	.	4	2	2	3	4	4	4	4	4	.	.	4	4	.	3	4	2	2	5	5	5	1	4	4	3	4	4	4	4	2
Poland	1	2	2	25	2	3	.	3	.	2	4	4	.	2	5	4	.	4	1	2	3	3	2	3	4	2	2	5	5	5	1	5	2	2	5	5	1	1	1
Poland	1	1	1	21	2	.	.	.	.	2	1	3	4	1	3	2	2	2	2	3	1	3	3	3	2	2	2	5	5	5	5	5	5	5	5	1	1	1	1
Poland	1	1	2	20	1	5	5	5	5	5	5	5	5	5	5	5	5	5	5	5	5	5	5	4	5	4	4	5	5	5	5	5	5	5	5	5	4	6	5
Poland	2	1	2	20	2	3	4	3	3	3	4	2	3	2	3	3	2	2	3	3	2	3	3	3	4	3	4	5	3	4	4	3	3	3	4	3	2	1	1
Poland	1	1	1	22	2	.	.	.	.	4	4	4	4	2	3	3	3	4	.	4	.	3	3	2	4	3	3	5	5	1	5	5	5	5	5	5	1	1	1
Poland	1	2	1	23	2	.	.	.	.	5	5	4	3	5	4	4	4	3	2	.	.	4	.	5	5	2	2	5	4	5	5	5	5	5	5	4	4	3	1
Poland	1	1	2	23	2	.	.	.	.	3	3	3	3	3	3	2	4	3	2	3	2	4	3	3	3	3	3	5	3	5	5	4	4	4	4	3	3	4	1
Poland	1	2	2	23	2	.	.	.	.	4	4	4	4	4	.	.	.	4	.	.	1	.	.	2	2	3	2	5	5	5	5	4	4	2	4	4	1	4	1
Poland	1	1	1	21	2	.	3	.	3	5	4	4	3	1	2	3	3	1	.	.	.	.	1	1	2	2	2	5	5	5	5	4	3	4	5	5	4	3	1
Poland	1	2	2	22	2	5	5	.	.	3	3	5	4	1	4	5	.	3	1	2	4	3	.	2	5	5	4	5	4	4	4	3	2	3	4	3	5	2	1
Poland	1	3	3	24	2	.	.	.	.	5	4	4	4	4	4	4	4	4	4	1	3	4	4	3	4	4	3	4	4	4	4	4	4	4	4	4	3	4	1
Poland	1	1	3	19	2	4	4	4	4	4	4	3	2	4	4	3	3	2	2	2	2	3	3	4	4	4	4	4	4	4	4	4	4	4	4	4	4	3	2
Poland	1	1	2	22	2	5	4	.	.	4	3	3	4	3	3	4	.	3	.	.	3	.	.	2	3	3	2	5	4	5	4	4	4	3	4	3	3	4	1
Poland	1	1	4	21	1	.	.	.	.	5	2	3	3	3	3	2	2	2	3	3	.	3	4	2	4	4	3	5	5	3	5	4	4	4	4	4	6	4	1
Poland	1	2	2	22	2	4	4	4	.	4	4	4	4	4	3	3	4	4	4	4	2	4	4	2	3	2	1	3	2	3	3	4	4	4	3	3	1	2	1
Poland	1	2	1	23	2	.	4	.	.	4	4	.	4	3	3	3	3	4	2	2	2	.	.	3	2	3	2	5	5	5	5	5	5	5	5	5	2	2	1
Poland	2	2	2	26	1	.	.	.	.	3	3	3	1	4	4	2	.	2	4	1	5	.	1	3	5	3	3	5	4	1	1	5	5	5	5	5	3	2	1
Poland	1	2	4	22	2	.	.	.	.	4	4	4	5	4	4	3	4	4	4	.	4	.	.	3	4	2	3	5	4	5	5	5	4	4	5	4	3	1	1
Poland	1	2	2	23	2	5	5	.	.	4	2	4	4	1	4	3	3	3	4	.	2	4	3	3	4	4	4	5	4	5	5	5	4	3	5	4	4	3	1
Poland	2	2	1	25	2	.	4	4	4	4	3	5	4	2	4	3	4	4	3	3	2	2	3	3	4	3	3	4	3	3	3	4	3	3	4	3	5	4	5
Poland	1	1	1	27	1	.	.	.	.	3	3	3	3	4	3	3	4	3	3	3	3	3	3	2	3	4	4	5	5	5	5	5	5	5	5	5	6	2	2
Poland	2	2	2	24	2	.	.	.	.	4	2	3	1	1	1	1	1	1	1	.	1	1	1	5	5	4	4	5	4	2	5	5	5	5	5	5	3	1	1
Poland	1	1	1	.	2	2	3	4	3	3	.	.	.	5	3	3	4	1	3	3	2	1	3	3	4	4	2	2	2	4	2	3	3	3	4	2	2	2	3
Poland	2	2	2	29	1	1	1	1	1	1	4	3	1	1	1	1	3	1	1	1	1	1	1	.	.	.	.	4	4	1	4	4	4	4	4	4	.	.	.
Poland	1	1	2	20	2	.	.	.	.	4	4	4	3	3	4	4	4	4	4	3	2	4	.	5	5	5	5	5	5	5	5	4	4	4	4	4	6	3	1
Poland	1	1	4	22	2	5	5	4	5	2	3	3	2	2	3	1	3	3	3	.	4	.	2	4	5	4	4	5	5	5	5	5	5	5	5	5	6	1	1
Poland	1	1	3	20	2	4	4	4	4	4	4	4	4	3	5	4	4	4	4	.	4	4	4	3	4	4	3	5	5	5	5	5	4	5	5	5	4	3	2
Poland	1	1	2	20	2	4	4	4	4	4	2	4	4	4	4	4	.	4	4	4	.	4	4	.	4	4	4	5	5	5	5	4	4	4	4	4	.	.	.
Poland	1	1	4	22	2	.	4	.	.	2	2	3	3	4	3	2	.	3	.	.	3	.	.	2	3	4	4	5	4	5	5	5	4	4	5	4	1	3	1
Poland	1	1	1	20	2	3	3	.	3	4	4	4	4	4	3	4	.	4	2	3	3	3	3	2	3	2	4	5	4	5	3	4	3	3	4	3	4	4	1
Poland	1	1	1	23	1	.	5	.	4	4	3	4	5	4	5	2	.	5	2	.	.	3	3	1	4	2	4	5	5	5	2	5	5	5	5	5	6	4	2
Poland	1	2	1	25	2	.	.	.	.	4	5	4	4	4	4	3	4	4	4	3	4	3	3	2	4	4	3	5	4	4	1	4	4	4	5	4	2	2	1
Poland	1	1	2	20	2	.	.	.	.	2	2	2	5	3	2	3	3	4	4	.	4	.	.	.	2	2	2	5	2	5	5	4	4	2	4	1	4	3	1
Poland	1	1	2	22	2	.	.	.	.	4	.	3	.	.	.	3	3	3	.	.	.	.	.	3	2	2	2	5	4	5	5	5	5	4	5	3	3	2	1
Poland	1	1	1	19	2	1	5	1	5	4	4	2	4	3	4	2	3	3	3	3	3	.	3	2	2	2	3	3	3	5	3	4	3	2	3	2	4	3	1
Poland	1	1	2	25	2	.	.	.	.	4	5	5	5	5	5	5	3	5	4	4	3	.	3	3	4	4	3	5	5	5	5	4	4	4	5	5	4	3	2
Poland	1	1	1	20	2	1	1	3	1	5	4	2	2	2	4	1	2	3	1	5	.	1	3	3	3	1	1	4	5	4	3	4	2	4	2	2	6	2	1
Poland	1	2	4	24	2	5	5	4	4	5	5	5	5	5	5	5	5	5	5	5	5	5	5	3	4	4	3	5	3	1	2	4	3	3	4	3	1	1	1
Poland	1	1	1	22	1	4	4	4	4	4	4	4	3	2	4	3	.	3	.	.	.	.	.	4	2	2	3	5	3	2	5	4	3	3	4	2	.	.	.
Poland	2	1	3	31	1	1	1	1	1	3	4	4	3	4	2	2	.	2	3	3	.	.	.	1	3	2	2	5	2	5	5	5	4	4	3	3	.	.	.
Poland	1	1	2	22	2	2	2	.	.	2	4	4	4	2	4	1	3	4	.	4	1	3	2	2	2	3	2	5	2	5	5	2	4	5	5	2	1	4	1
Poland	1	1	2	20	2	3	3	3	3	4	4	4	3	4	4	2	3	3	3	3	4	3	4	2	3	2	2	5	4	5	5	5	4	4	4	4	1	1	1
Poland	1	2	1	22	2	.	.	.	.	3	4	4	3	4	3	3	3	2	4	4	3	3	4	2	3	2	2	5	5	4	4	5	5	4	5	4	6	3	2
Poland	2	1	1	21	2	3	.	.	.	4	4	4	4	4	4	3	3	4	.	.	.	4	.	1	4	2	.	5	5	5	3	4	3	4	4	3	4	2	1
Poland	1	1	2	19	1	.	.	.	.	3	3	3	4	4	3	4	.	4	3	.	.	.	.	4	4	4	3	5	5	5	5	4	4	4	4	4	6	3	1
Poland	1	1	2	22	2	.	.	.	.	5	4	5	4	4	4	3	3	4	.	.	2	.	.	3	4	4	4	5	5	4	5	4	3	4	4	4	3	3	1
Poland	1	1	1	20	1	.	3	3	3	4	4	3	3	3	3	3	.	3	2	3	.	3	.	3	3	3	2	4	3	5	5	4	4	3	3	3	1	5	1
Poland	1	2	1	26	2	.	.	.	.	5	5	5	5	5	4	.	.	5	4	.	3	.	.	.	3	3	3	5	5	5	5	4	4	4	3	3	4	4	1
Poland	1	1	2	20	2	3	3	3	3	3	3	3	3	3	3	3	4	3	3	3	3	3	2	4	3	4	3	4	2	3	2	3	3	4	3	2	3	4	1
Poland	1	2	2	24	2	.	.	4	4	4	5	4	4	4	4	.	.	4	2	4	2	.	4	3	4	3	4	3	5	3	1	4	4	4	4	4	6	3	1
Poland	1	1	4	19	1	.	.	.	.	4	4	4	5	5	4	2	.	3	3	.	.	4	.	4	4	5	4	5	4	5	5	5	5	4	5	4	1	2	1
Poland	2	2	1	23	2	1	1	1	1	1	1	1	1	1	1	1	3	1	1	1	1	1	1	4	1	3	2	5	5	5	5	3	3	3	3	3	2	2	1
Poland	1	1	1	20	2	3	3	2	2	5	4	4	3	2	3	3	4	4	1	3	5	3	3	1	4	3	3	5	5	5	5	4	3	2	4	2	5	5	1
Poland	1	1	3	21	1	.	.	.	.	4	2	2	4	4	4	5	3	4	3	3	.	.	.	2	3	3	4	5	5	5	1	5	5	5	5	5	6	3	2
Poland	1	2	2	38	2	.	.	.	.	1	2	3	2	1	2	2	2	2	.	.	1	2	.	.	3	3	4	5	4	5	5	4	4	4	4	4	2	1	1
Poland	1	1	2	21	1	5	.	4	.	4	4	4	4	4	4	4	.	4	4	4	.	4	4	3	4	4	4	5	5	5	5	5	5	5	5	4	5	3	.
Poland	1	2	1	22	1	3	4	3	4	4	4	4	5	5	4	3	5	5	4	4	.	5	.	2	4	3	2	5	5	5	5	5	5	5	5	5	6	5	3
Poland	1	1	1	22	1	4	.	4	.	2	2	3	4	2	2	2	4	3	3	3	3	4	3	1	2	2	2	5	5	5	5	4	4	4	4	4	3	3	1
Poland	1	1	2	22	2	2	1	2	2	3	2	4	2	3	1	1	2	2	4	4	2	.	3	2	3	3	2	5	4	3	5	4	4	3	4	3	5	3	2
Poland	1	1	4	22	2	3	3	.	.	3	3	3	4	4	4	4	4	4	4	4	.	3	3	3	4	3	3	5	5	5	5	4	4	4	4	4	4	2	1
Poland	1	1	4	20	1	.	.	.	.	5	.	5	4	.	4	3	.	4	4	.	.	.	.	4	4	4	.	5	5	5	5	5	5	5	5	5	6	3	1
Poland	1	1	3	20	1	4	3	3	3	4	3	3	5	5	4	3	3	5	5	4	3	3	3	2	4	3	4	5	5	5	5	5	4	5	5	5	2	2	2
Poland	2	1	3	25	1	.	.	.	.	3	3	4	4	4	2	2	.	2	2	2	.	.	.	2	2	2	2	5	3	5	5	4	4	3	4	3	4	1	1
Poland	1	1	1	21	2	3	2	3	3	4	4	3	4	2	3	2	2	2	1	3	3	3	3	3	2	2	2	5	4	4	2	3	3	3	3	3	1	1	1
Poland	1	1	4	20	1	.	1	3	3	2	2	4	2	3	1	5	.	3	5	.	.	.	.	2	3	1	1	5	5	5	5	4	4	4	4	4	1	1	1
Poland	1	2	2	23	2	4	4	3	4	4	4	4	4	4	4	4	3	4	5	5	3	4	4	4	4	4	4	5	5	5	5	4	4	4	4	4	1	1	1
Poland	1	2	4	24	1	5	3	.	.	3	2	2	3	1	5	5	2	3	2	.	.	.	2	1	4	1	5	5	4	5	5	5	5	1	5	1	4	2	1
Poland	1	1	4	22	1	1	1	1	1	1	1	1	1	2	1	1	.	1	3	3	3	3	3	1	4	1	1	5	5	5	1	5	5	5	5	5	.	.	.
Poland	1	2	1	23	2	4	4	.	.	4	4	4	4	4	4	4	4	4	4	4	4	4	.	2	4	3	4	5	4	5	5	4	4	3	4	3	4	4	1
Poland	1	2	2	20	2	.	3	.	.	4	4	2	3	3	4	.	.	3	4	2	.	.	.	3	4	4	4	5	4	5	5	5	4	5	5	3	4	3	1
Poland	1	1	4	20	2	2	2	3	2	2	1	3	2	1	2	1	.	2	2	3	3	3	2	2	1	2	1	5	5	5	5	5	4	4	5	4	6	1	1
Poland	1	1	1	22	2	4	.	.	.	3	4	.	5	4	5	3	.	4	.	.	2	.	.	3	5	4	4	5	4	5	5	5	5	5	5	4	4	3	1
Poland	1	1	1	21	2	.	4	.	2	5	2	2	2	3	4	2	.	2	3	.	.	.	.	.	2	5	5	5	3	5	5	1	4	3	4	2	6	4	1
Poland	1	2	1	23	2	.	.	.	.	5	3	5	3	.	1	1	1	1	1	1	1	3	3	5	5	5	5	5	5	5	5	5	5	5	5	5	1	2	1
Poland	1	2	1	25	2	4	4	.	2	5	4	3	5	5	4	5	5	5	.	.	.	.	.	4	4	5	4	5	5	4	5	5	5	4	5	5	4	.	1
Poland	1	1	1	20	2	1	1	2	2	4	3	4	3	4	1	2	3	3	.	.	4	.	.	3	2	2	2	5	5	5	5	5	.	5	5	4	6	3	1
Poland	1	1	1	19	2	.	.	.	.	.	.	3	3	4	.	4	2	1	2	4	1	1	1	3	3	3	3	2	4	2	1	3	3	5	1	1	2	5	4
Poland	1	1	1	22	2	1	2	.	1	5	2	5	5	2	2	4	.	4	3	.	.	4	.	3	5	5	4	5	5	5	5	5	5	5	5	5	1	1	1
Poland	1	1	2	20	2	.	.	.	.	4	4	4	3	5	3	4	4	4	4	4	3	3	4	4	4	3	4	5	5	5	5	5	3	4	5	5	1	1	1
Poland	1	2	1	23	2	4	4	4	4	3	3	3	3	3	4	4	4	4	4	3	4	4	4	4	4	3	2	5	5	5	5	4	3	3	4	3	.	.	.
Poland	1	2	1	24	2	.	4	.	4	3	4	4	4	4	3	4	4	4	4	3	4	4	4	3	4	2	4	5	3	3	4	3	4	3	4	4	2	4	1
Poland	1	1	1	20	2	2	3	2	3	4	4	4	4	3	3	.	.	.	.	.	.	.	.	2	3	2	2	5	5	5	5	5	4	4	5	4	6	1	1
Poland	1	1	4	.	1	.	.	.	.	2	2	2	3	2	2	2	.	2	2	2	2	2	2	3	2	2	2	4	3	2	1	4	4	4	4	3	4	3	1
Poland	1	1	2	21	2	3	3	4	4	4	2	3	4	4	4	4	4	4	2	3	3	4	3	3	3	3	2	5	5	5	5	4	4	3	4	3	4	4	1
Poland	1	2	4	24	1	.	.	2	2	4	2	5	4	1	4	4	.	4	4	2	5	5	4	3	2	4	4	5	3	5	5	5	5	5	5	5	5	4	2
Poland	1	1	1	23	2	1	1	.	1	5	5	4	4	1	2	2	1	3	3	2	1	3	2	3	3	2	5	5	2	5	2	4	3	4	4	4	1	1	1
Poland	2	2	3	27	2	.	.	.	.	3	3	4	.	4	3	3	3	.	.	4	1	3	3	.	3	4	4	5	1	4	4	3	3	1	4	1	2	4	2
Poland	1	1	4	20	2	2	2	2	2	3	4	4	4	2	3	3	3	3	3	3	4	3	3	3	5	4	4	5	4	5	3	4	3	3	4	4	3	3	1
Poland	1	1	4	23	2	3	3	3	3	4	4	3	3	2	3	3	3	3	3	3	3	3	3	4	2	4	4	5	4	5	5	4	4	4	4	4	.	.	.
Poland	2	1	2	21	2	.	.	.	.	4	4	4	2	4	3	3	3	2	2	3	4	.	3	2	3	4	4	5	3	5	5	3	3	2	4	3	4	2	1
Poland	1	1	1	20	1	.	4	.	.	5	4	.	4	4	4	.	4	4	.	4	.	.	.	4	3	3	3	5	4	4	4	4	4	5	5	3	4	4	2
Poland	1	1	4	21	1	2	3	.	.	4	3	4	4	4	2	1	4	3	2	3	1	4	3	4	3	2	2	5	4	5	5	5	4	5	5	4	1	1	1
Poland	1	1	3	20	2	.	.	.	.	4	5	5	5	5	4	3	3	5	5	5	3	5	5	2	3	3	2	5	5	5	5	3	3	3	3	3	4	4	2
Poland	1	1	4	22	2	1	2	1	2	1	4	3	2	2	3	3	3	3	3	3	1	3	3	2	2	2	2	5	5	5	5	4	3	4	4	4	4	3	1
Poland	1	1	4	20	2	.	.	.	.	3	3	2	2	3	2	2	1	3	3	.	1	2	.	2	2	2	2	5	4	5	5	4	4	4	4	4	6	3	1
Poland	1	1	1	23	2	.	.	.	.	3	2	2	2	2	2	2	2	3	3	3	3	3	3	2	3	3	3	4	4	3	1	4	.	3	4	4	2	2	2
Poland	1	1	2	20	2	5	.	4	.	4	4	4	4	4	4	4	.	4	4	4	4	.	.	3	4	4	3	5	4	4	4	4	4	4	4	4	6	4	3
Poland	1	1	1	24	2	.	3	.	3	4	4	4	4	4	2	2	.	3	.	.	.	.	.	1	3	2	2	5	5	5	5	4	4	5	5	4	4	3	1
Poland	1	1	1	20	2	4	4	4	4	5	5	5	5	5	5	.	.	5	5	5	.	.	.	.	4	4	.	5	5	5	5	4	4	4	4	4	6	6	1
Poland	1	1	2	21	2	.	4	.	.	3	2	.	4	3	4	2	3	3	3	3	2	3	.	3	2	3	3	4	4	5	5	4	4	4	4	4	4	2	2
Poland	1	1	1	23	1	.	5	.	4	4	4	4	4	5	2	4	4	4	.	.	.	.	.	3	4	4	4	5	5	5	5	5	5	5	5	5	3	4	1
Poland	1	1	1	23	1	5	.	.	.	.	5	5	3	4	5	4	5	4	.	.	2	4	.	2	4	5	4	5	2	1	1	5	4	2	5	5	2	2	1
Poland	1	1	1	22	2	5	.	.	.	2	4	4	4	3	5	4	4	4	.	.	2	4	4	3	4	4	4	5	3	2	2	3	3	1	2	2	2	2	1
Poland	1	1	1	19	2	3	4	2	2	2	3	4	4	2	1	3	3	3	4	3	.	.	.	1	2	2	1	5	5	4	4	4	4	3	5	4	1	1	1
Poland	1	1	4	20	2	.	.	.	.	2	3	3	4	2	2	4	4	3	4	3	3	4	3	3	2	2	2	5	5	5	5	4	4	4	4	3	6	3	1
Poland	1	1	2	21	2	4	4	.	.	3	4	4	3	3	4	.	3	3	2	3	.	.	.	3	3	3	2	5	4	5	4	5	5	4	5	4	4	4	1
Poland	1	1	1	23	2	.	.	.	.	4	2	3	4	3	4	3	.	2	4	.	2	.	.	3	3	4	3	5	.	1	5	4	4	4	4	3	4	3	1
Poland	2	2	1	31	2	3	3	3	3	4	4	3	3	3	2	3	3	3	3	3	.	3	3	3	3	3	3	5	4	4	4	4	3	3	4	3	.	.	.
Poland	1	1	4	21	2	3	1	2	2	5	4	5	4	4	5	4	.	4	4	4	.	.	.	4	2	3	3	5	4	4	5	4	3	3	4	4	3	3	1
Poland	1	1	4	21	1	.	.	.	.	5	2	3	3	2	5	4	4	4	4	3	3	4	4	5	5	4	3	5	4	5	1	4	4	3	4	3	4	4	1
Poland	1	1	3	22	2	.	.	4	.	5	2	4	.	2	4	3	3	1	3	.	2	.	.	2	1	1	2	5	5	5	5	4	3	4	5	4	4	1	1
Poland	1	2	4	23	2	1	1	1	1	5	2	5	3	1	3	3	4	4	4	4	1	.	.	3	4	4	4	4	4	4	5	5	5	4	5	4	3	5	2
Poland	2	1	2	25	2	4	4	5	5	5	4	4	4	4	5	5	5	4	.	.	.	.	.	3	5	5	5	5	5	5	5	5	5	5	5	5	1	1	1
Poland	1	1	3	22	2	.	.	.	.	2	3	3	1	1	4	1	1	1	1	1	3	1	1	.	1	3	5	4	4	4	4	4	3	4	4	4	4	1	1
Poland	2	2	2	23	2	.	2	.	2	5	4	3	3	2	3	3	3	4	2	2	.	4	.	1	2	2	2	5	5	1	5	4	3	2	4	3	1	3	1
Poland	1	2	1	23	2	4	4	.	4	3	3	3	3	3	4	5	4	5	5	5	3	2	3	3	4	3	3	5	5	5	5	1	2	2	2	2	6	6	6
Poland	1	1	1	22	2	3	3	4	4	4	4	4	4	4	5	4	4	4	5	4	3	4	4	2	2	2	1	5	4	5	5	3	3	4	4	2	4	4	3
Poland	1	1	3	21	1	.	.	.	.	4	3	4	4	2	5	2	3	4	.	.	.	4	4	2	3	5	4	5	5	5	1	5	5	4	5	5	4	4	1
Poland	1	1	3	22	1	.	.	.	.	4	4	4	4	3	3	3	3	3	.	.	.	.	.	3	4	4	4	5	5	5	1	5	5	3	4	4	5	3	1
Poland	1	2	3	24	2	2	3	3	3	4	3	4	3	3	4	4	4	3	3	3	3	3	3	2	4	3	2	5	3	5	5	4	2	3	4	3	2	3	1
Poland	1	2	1	26	2	5	.	.	.	4	1	.	1	3	1	3	4	2	.	.	1	.	.	2	4	2	3	5	5	5	5	5	5	4	5	4	5	1	1
Poland	2	2	1	26	2	3	4	4	4	5	5	5	4	3	4	4	4	4	3	4	3	4	4	4	3	4	4	5	5	5	5	5	4	5	5	4	3	2	1
Poland	1	1	1	21	2	.	.	.	.	4	3	3	4	2	2	2	.	3	.	.	.	3	.	3	4	2	4	5	5	5	5	4	4	5	5	4	3	3	1
Poland	1	1	1	21	2	4	4	.	.	4	4	4	4	4	4	.	.	4	4	.	.	4	4	2	3	4	3	5	5	5	5	4	4	4	4	4	.	.	.
Poland	1	2	2	23	1	4	2	.	.	4	4	4	3	3	3	2	3	3	2	3	2	3	3	2	2	3	2	5	4	5	3	3	3	2	4	3	4	3	2
Poland	1	1	2	21	2	.	.	.	.	4	2	2	4	4	3	2	.	3	3	.	4	.	.	3	3	2	2	5	5	5	5	4	4	3	4	4	2	3	1
Poland	1	1	4	21	2	2	3	.	.	1	1	1	3	2	1	.	.	3	2	3	1	.	.	3	5	4	5	5	5	5	5	4	4	5	5	5	4	2	1
Poland	1	1	3	22	2	3	.	.	.	4	3	2	4	3	4	.	.	3	2	3	3	3	3	3	4	2	2	5	3	5	5	4	3	4	5	3	5	3	1
Poland	1	2	1	24	2	4	4	.	.	5	5	5	5	5	4	4	.	4	.	4	3	4	4	4	4	4	2	5	4	1	2	4	4	3	5	4	4	2	1
Poland	1	2	2	25	1	.	.	.	.	2	1	3	1	2	3	2	2	3	2	.	1	.	.	3	5	3	1	5	2	5	5	5	5	5	5	5	5	3	1
Poland	1	1	4	21	2	5	5	5	5	4	4	4	4	4	5	5	5	4	4	4	2	4	4	4	5	4	4	4	5	5	5	5	3	3	5	5	4	4	1
Poland	1	2	2	22	1	4	.	.	.	4	3	4	2	2	2	3	3	3	.	3	1	3	.	2	3	4	4	5	5	5	5	5	5	5	5	5	2	3	1
Poland	1	1	3	28	2	.	.	.	.	5	4	4	3	4	4	4	.	4	4	2	.	.	3	4	4	4	4	5	5	5	5	5	5	5	5	5	6	4	3
Poland	1	1	1	22	2	.	5	.	4	4	4	.	5	4	4	3	.	4	.	.	.	3	.	3	3	4	4	5	4	5	5	4	3	4	4	4	1	1	1
Poland	1	1	4	23	2	4	4	2	4	4	3	4	4	2	4	4	4	4	4	4	3	4	4	4	4	4	4	5	4	5	1	4	4	4	4	4	4	1	3
Poland	1	1	2	22	1	.	.	.	.	2	3	4	4	2	2	2	2	3	.	.	2	.	.	3	4	2	2	5	5	4	4	4	4	4	4	4	4	3	2
Poland	1	3	2	52	1	4	4	5	5	4	4	5	5	4	3	4	3	3	3	3	2	3	2	3	3	3	4	3	4	4	4	4	3	4	4	4	4	6	5
Poland	1	2	2	24	2	5	5	5	5	4	4	4	5	4	4	4	4	4	4	.	2	4	.	5	5	4	4	5	4	2	3	5	4	5	5	4	.	5	1
Poland	1	1	4	22	2	.	.	.	.	4	4	4	2	5	4	4	.	.	.	.	.	.	.	2	4	2	2	5	3	3	3	4	4	4	5	4	3	3	1
Poland	1	1	1	22	2	.	3	.	3	4	3	3	4	2	3	4	3	4	2	.	2	.	3	3	4	3	3	5	5	5	5	5	5	5	5	5	1	1	1
Poland	1	1	3	19	2	3	3	.	.	1	4	1	2	1	.	.	2	2	.	4	1	.	5	4	4	3	3	5	5	4	4	5	5	5	5	4	3	1	1
Poland	1	1	1	21	2	.	.	.	.	2	1	2	2	1	3	2	2	3	2	1	2	3	.	1	2	2	.	5	4	5	5	4	3	3	4	3	3	2	1
Poland	1	1	3	22	2	3	3	3	3	3	3	4	3	2	3	3	3	3	3	3	3	3	3	3	4	3	3	5	5	4	4	4	4	4	4	4	2	4	2
Poland	1	1	2	23	2	3	3	1	2	1	3	4	1	4	2	1	2	2	3	1	1	3	2	2	1	2	2	5	5	5	2	4	3	5	5	3	1	1	1
Poland	1	1	1	19	2	4	3	1	1	4	3	3	2	4	4	2	.	4	2	.	3	.	.	2	2	3	2	4	3	4	3	4	3	4	4	3	3	3	1
Poland	1	1	4	27	2	.	4	.	4	4	4	4	2	2	3	2	.	4	4	.	4	.	.	2	5	4	4	5	3	5	5	4	4	4	4	3	1	2	1
Poland	1	2	1	24	2	4	.	.	.	2	3	3	4	2	2	2	2	3	2	.	.	2	.	2	2	.	3	5	4	5	5	4	3	2	4	3	4	2	1
Poland	1	1	2	22	2	.	.	.	.	4	3	3	4	2	2	.	.	3	3	3	3	3	3	3	4	4	4	5	3	1	5	3	4	3	4	5	6	3	1
Poland	1	1	3	22	.	4	4	.	.	4	5	4	4	2	5	5	4	4	4	.	3	4	.	4	4	4	4	5	5	5	5	4	4	4	4	4	1	1	1
Poland	1	1	2	20	2	5	5	5	5	5	4	4	3	3	4	4	4	4	.	.	4	.	.	4	5	4	3	5	5	5	5	4	4	4	5	4	1	1	1
Poland	2	1	2	25	1	5	5	5	4	5	5	5	5	5	5	5	5	5	5	5	5	5	5	4	5	5	3	5	5	5	5	5	5	5	5	5	3	3	2
Poland	1	1	4	22	2	3	3	4	4	4	2	3	3	2	3	3	3	2	3	.	.	.	.	3	3	3	3	5	5	5	5	3	3	4	3	3	4	4	1
Poland	1	2	1	22	1	3	3	3	3	5	4	4	4	5	4	4	3	4	3	3	3	3	3	2	3	2	2	5	5	5	5	5	5	5	5	5	4	4	1
Poland	1	1	4	21	1	2	2	2	3	2	3	3	3	2	3	2	2	3	2	4	2	1	4	2	3	2	3	3	1	3	3	5	2	4	4	4	1	2	1
Poland	1	1	1	19	2	.	.	2	2	3	4	2	2	4	1	2	3	1	1	3	3	3	3	3	4	2	2	5	4	4	4	4	3	3	4	3	4	3	1
Poland	1	1	2	20	2	4	4	4	4	3	3	5	4	3	.	5	3	4	4	4	3	3	3	3	2	2	2	5	4	4	5	5	4	4	5	4	6	4	1
Poland	1	1	3	19	2	3	3	3	3	4	5	5	5	1	5	4	5	4	4	4	.	4	.	5	5	5	5	5	5	3	3	5	5	5	5	5	6	5	1
Poland	1	1	4	21	2	.	.	.	.	4	.	.	4	4	4	4	4	.	.	4	.	.	.	3	4	3	3	5	5	5	5	4	4	4	4	4	6	4	2
Poland	1	1	3	23	4	2	.	.	.	5	3	3	3	2	2	2	2	2	3	3	3	3	3	2	3	4	4	5	5	5	5	3	3	4	4	4	3	2	1
Poland	1	1	1	23	2	.	.	.	.	1	1	1	2	1	4	1	1	2	2	2	3	2	2	4	4	5	5	5	5	5	5	5	.	4	4	5	3	2	1
Poland	1	2	2	23	2	4	4	.	.	4	4	5	4	3	4	4	4	4	4	.	3	.	.	2	2	2	2	5	3	2	5	5	5	3	5	3	.	.	.
Poland	2	1	2	30	1	.	.	.	.	4	4	4	4	4	4	4	4	4	1	1	.	.	.	5	5	5	5	5	5	5	5	4	4	4	4	4	.	.	.
Poland	1	1	1	23	2	4	4	.	.	4	4	4	3	3	4	3	3	4	4	4	4	4	4	2	3	2	3	5	4	5	5	4	4	4	5	4	4	4	1
Poland	1	1	1	22	1	.	.	.	.	3	4	3	2	5	2	.	3	3	4	3	.	4	3	1	3	2	3	5	5	5	5	5	4	4	5	5	2	3	1
Poland	1	1	4	21	1	.	.	4	.	4	2	2	1	1	3	2	2	2	3	.	.	.	.	3	4	4	2	5	5	5	5	2	2	4	4	3	6	2	1
Poland	1	1	2	20	2	.	.	.	.	5	2	3	2	2	2	1	1	2	2	.	.	.	.	2	1	3	2	5	5	5	5	4	2	2	4	2	5	2	1
Poland	1	1	1	25	1	.	.	.	.	4	.	2	.	2	3	3	3	4	4	1	.	.	.	3	4	4	.	5	5	5	5	5	5	3	5	5	1	2	1
Poland	1	1	2	24	1	4	3	4	3	5	4	4	4	4	4	2	.	3	3	2	2	3	3	3	4	3	2	5	5	5	1	5	4	4	5	4	4	3	1
Poland	1	1	4	22	1	2	2	2	2	5	3	3	3	2	2	2	.	3	2	3	4	3	3	1	1	2	3	4	3	4	2	5	5	4	5	4	5	3	2
Poland	1	1	1	20	2	3	3	3	3	4	2	1	3	3	1	1	1	2	2	.	3	.	.	1	5	1	1	3	3	2	2	3	2	2	3	2	3	3	1
Poland	1	2	4	22	2	2	2	3	3	4	4	4	2	1	3	4	4	2	3	3	4	3	3	2	2	2	4	5	5	5	5	4	3	4	3	3	2	4	.
Poland	1	1	4	21	2	3	3	.	.	3	3	3	3	4	3	3	3	3	2	3	3	3	3	3	4	4	4	5	4	4	4	5	5	5	5	5	5	4	2
Poland	1	1	2	21	2	.	.	.	.	4	4	3	2	2	3	3	3	4	.	.	3	.	.	5	3	3	1	5	5	5	5	5	5	5	5	5	1	1	1
Poland	1	1	2	20	2	.	4	.	.	4	3	4	3	2	5	4	4	3	3	.	.	.	4	.	4	4	.	5	5	5	5	5	5	5	5	5	6	4	2
Poland	1	2	2	23	2	.	.	3	.	4	4	4	2	1	2	3	3	3	.	.	.	3	.	3	4	4	4	5	5	5	5	5	5	4	5	5	2	3	1
Poland	2	2	1	33	2	5	5	.	.	3	4	4	3	4	4	4	4	4	3	5	3	3	3	3	4	4	3	3	3	2	2	3	3	3	4	4	6	3	1
Poland	1	1	2	20	2	.	.	4	.	4	3	4	3	3	3	3	.	3	3	.	3	3	.	3	4	2	3	5	5	2	5	5	5	4	5	5	6	2	1
Poland	1	1	1	21	2	.	.	.	.	5	5	4	4	5	5	4	.	4	.	.	.	4	.	1	3	2	2	5	5	5	5	3	3	4	4	4	6	4	1
Poland	1	2	4	24	2	.	.	3	3	4	4	4	4	3	3	3	.	.	.	.	.	.	.	2	2	2	2	5	3	5	5	5	4	5	5	3	4	2	1
Poland	1	1	4	22	2	.	.	.	.	2	3	3	3	1	2	3	2	2	2	2	1	1	2	2	3	1	1	5	2	3	3	4	2	3	3	3	6	5	1
Poland	1	1	2	23	1	5	5	5	5	5	5	5	5	5	4	4	4	4	4	4	4	5	4	5	5	5	5	5	5	5	5	4	4	4	4	4	.	.	.
Poland	1	2	2	23	2	.	.	.	.	4	4	.	.	2	2	3	3	3	.	.	1	3	.	2	3	4	2	5	5	5	5	5	5	4	5	5	4	2	1
Poland	1	1	1	20	2	3	3	.	.	5	4	4	3	4	4	3	4	4	2	3	3	3	3	2	1	3	3	5	5	5	5	5	4	4	5	4	6	3	1
Poland	1	1	2	28	2	4	4	4	4	4	4	4	4	4	4	3	.	4	4	4	3	.	4	4	4	3	3	3	3	4	3	4	4	4	5	3	1	1	1
Poland	1	3	3	27	2	4	.	.	.	3	2	3	2	4	2	4	5	3	4	.	.	4	4	4	4	3	3	5	5	5	5	4	.	4	4	4	4	4	2
Poland	1	2	4	24	2	4	4	4	4	.	.	4	4	4	5	4	4	4	4	.	.	4	.	.	4	3	3	5	5	5	5	5	4	5	5	4	1	1	1
Poland	2	1	3	23	1	.	.	.	.	5	5	5	5	5	3	4	4	4	5	.	.	4	.	3	5	5	5	5	5	5	5	5	5	5	5	5	4	4	2
Poland	1	1	2	20	2	.	.	.	.	1	1	2	3	3	2	2	2	4	3	3	3	4	3	1	4	1	1	5	5	5	5	5	5	5	5	5	4	4	4
Poland	1	1	1	20	1	4	4	4	4	4	4	4	4	5	4	4	4	4	3	3	3	4	4	4	5	5	4	5	5	5	5	5	5	5	5	5	6	2	1
Poland	1	3	3	27	1	5	5	5	5	3	3	.	4	4	5	5	5	5	5	.	.	5	.	3	5	5	5	5	5	1	5	5	5	5	5	5	4	1	1
Poland	1	2	2	22	1	.	.	.	.	4	4	2	4	1	4	4	4	4	4	.	2	.	.	1	2	4	4	5	5	5	5	5	5	4	5	4	6	2	1
Poland	1	2	1	20	2	3	3	.	.	5	5	5	5	5	5	5	5	5	4	5	4	4	5	3	5	5	4	5	5	5	5	5	5	5	5	5	4	4	2
Poland	2	2	1	23	2	.	.	.	.	4	4	3	4	3	2	3	4	3	3	3	3	3	3	3	3	4	2	3	4	3	3	4	3	3	4	3	2	2	1
Poland	1	1	2	21	2	4	4	4	5	5	5	4	4	2	5	3	.	3	4	.	.	4	.	4	3	3	3	5	5	3	1	5	5	5	5	5	4	3	1
Poland	1	2	4	22	1	5	.	4	.	4	2	3	.	4	3	3	.	.	3	3	.	.	3	2	4	1	.	5	5	5	5	5	5	2	5	4	.	.	.
Poland	1	2	1	21	1	4	4	4	4	4	4	3	4	4	4	4	4	4	4	4	4	4	4	3	4	3	2	4	5	5	5	3	3	3	3	3	1	1	1
Poland	1	1	1	20	2	.	.	.	.	3	4	4	2	1	2	2	3	2	3	.	.	.	.	2	3	2	2	5	4	3	2	4	4	3	4	4	4	3	1
Poland	1	2	4	22	2	2	2	2	2	5	5	5	4	4	4	4	4	3	3	3	3	3	3	3	3	3	3	3	3	4	4	2	2	2	3	3	1	1	1
Poland	2	1	1	19	2	3	2	3	2	3	3	3	3	4	2	2	2	2	3	3	.	2	3	3	2	3	2	4	4	4	4	5	5	3	5	3	1	4	1
Poland	1	2	4	24	2	3	3	.	.	3	3	3	3	3	.	4	2	3	.	.	2	3	3	4	3	4	4	5	4	4	3	4	3	3	4	3	3	3	2
Poland	1	2	2	24	2	4	.	.	.	3	3	4	3	2	4	3	.	4	4	.	3	.	.	3	4	4	4	5	1	5	5	4	3	4	4	4	1	4	1
Poland	1	1	4	24	1	.	.	.	.	5	2	2	3	2	3	2	1	2	.	.	.	2	2	1	1	4	2	5	4	5	4	5	5	5	5	5	6	1	1
Poland	1	1	1	20	2	5	.	.	.	4	3	3	.	3	3	2	3	3	5	4	4	3	.	2	4	3	2	4	4	5	3	5	4	4	5	4	5	3	1
Poland	1	1	1	22	2	1	1	.	.	1	1	1	1	3	1	1	1	1	1	.	.	.	.	5	5	4	4	5	4	5	5	4	4	5	.	4	1	3	2
Poland	1	1	3	20	1	.	.	2	4	3	2	2	5	1	2	.	.	3	3	3	3	3	3	2	4	2	2	5	4	5	5	5	5	5	5	5	6	2	1
Poland	1	1	1	21	2	.	.	.	.	4	2	3	1	1	2	3	3	2	3	.	2	3	.	3	3	2	2	5	5	5	5	4	3	4	4	4	3	3	1
Poland	1	1	2	23	2	5	4	.	.	4	4	4	4	4	4	4	4	4	4	4	.	4	4	3	4	3	3	5	5	5	5	4	4	4	4	4	4	4	4
Poland	1	1	1	22	2	4	4	4	4	4	3	4	5	4	4	5	3	4	4	4	2	4	4	3	3	4	4	5	5	5	5	4	4	4	4	4	6	4	2
Poland	1	1	2	21	2	.	.	.	.	4	4	4	4	3	4	3	3	4	4	5	2	5	3	4	5	4	5	5	5	5	5	5	4	5	5	4	2	1	1
Poland	1	2	2	24	1	2	2	3	3	3	3	4	.	3	4	4	4	4	4	4	2	4	3	3	2	3	4	5	5	5	5	4	4	4	4	4	3	3	2
Poland	1	1	2	21	2	.	.	.	.	4	4	5	4	4	4	4	4	4	3	3	2	3	3	3	4	4	3	5	4	4	4	4	4	3	4	4	1	1	1
Poland	1	1	4	22	1	3	3	3	3	3	4	3	3	2	3	4	3	5	3	4	4	3	3	4	2	3	3	5	5	5	5	4	4	5	4	3	1	1	2
Poland	1	2	2	24	2	.	.	.	.	3	1	3	1	1	1	2	.	3	4	.	2	.	.	.	2	2	.	4	3	5	5	5	4	4	5	3	3	2	1
Poland	1	1	3	21	1	2	2	2	2	5	2	1	3	4	.	3	2	2	.	3	.	.	.	3	4	3	2	3	2	5	1	5	5	5	5	4	1	1	1
Poland	1	2	2	23	2	.	.	.	.	4	3	4	4	3	4	4	4	4	3	2	.	.	.	3	4	3	3	4	4	5	5	4	4	4	4	3	4	4	2
Poland	1	1	2	22	2	.	.	.	.	4	4	4	2	5	.	.	.	4	4	4	.	5	4	4	3	2	3	5	5	5	5	5	5	5	5	5	4	1	1
Poland	1	1	4	20	1	.	.	.	.	2	1	4	4	3	3	.	.	4	3	.	.	.	.	1	3	2	5	5	5	5	1	4	4	5	5	5	1	4	1
Poland	1	2	1	22	3	5	.	4	5	4	3	2	3	3	3	3	3	3	3	.	.	.	.	4	3	4	3	5	1	5	2	5	5	3	5	3	1	3	1
Poland	2	2	1	24	2	4	3	4	3	3	4	4	4	4	4	4	4	4	3	3	3	3	3	3	3	3	3	4	4	4	4	4	4	4	4	4	4	3	2
Poland	1	1	4	21	2	4	4	4	4	3	3	4	4	4	4	4	4	4	4	3	3	4	4	3	4	3	3	5	4	4	4	4	4	4	4	4	1	1	1
Poland	1	1	1	25	2	.	.	.	.	3	3	5	5	5	4	3	3	4	4	4	1	.	.	3	3	3	3	5	5	5	5	5	5	5	5	5	4	4	3
Poland	1	1	2	22	2	.	.	.	.	4	4	4	4	3	3	3	3	3	3	3	3	3	3	3	3	3	3	5	.	5	5	4	4	4	3	3	4	3	2
Poland	2	2	2	29	2	5	5	5	5	5	5	5	5	5	5	5	5	5	5	5	5	5	5	5	5	5	5	5	5	5	5	4	4	4	4	4	5	4	4
Poland	1	2	2	23	1	.	.	.	.	4	4	5	5	4	2	4	4	4	3	3	2	3	3	2	2	3	2	5	4	5	5	4	5	4	5	4	3	2	1
Poland	1	2	2	23	2	.	4	.	5	4	4	4	4	2	4	3	.	4	4	.	3	3	3	3	2	4	3	5	4	3	5	4	3	4	5	4	4	3	2
Poland	1	2	1	33	2	4	.	4	.	5	3	5	4	4	4	4	4	.	.	.	1	4	4	4	4	4	4	5	5	5	5	4	3	3	5	3	3	3	2
Poland	1	1	3	22	2	3	3	3	3	5	3	4	4	4	4	4	4	5	4	4	3	4	4	3	3	4	3	5	3	5	5	5	5	5	5	3	4	4	2
Poland	1	1	1	24	1	.	.	.	.	4	4	4	3	4	4	2	.	4	5	.	.	.	.	3	3	4	3	5	5	5	5	4	4	4	4	4	4	4	2
Poland	2	1	1	23	2	3	4	3	3	4	3	4	4	4	4	4	4	4	4	3	.	4	4	5	4	5	4	5	5	5	5	5	5	5	5	5	2	1	1
Poland	1	2	1	22	2	.	.	.	.	4	4	4	4	4	4	4	4	3	3	3	3	4	4	3	4	4	3	5	4	5	3	5	5	4	5	3	3	3	1
Poland	1	1	2	21	2	2	2	2	2	3	2	3	3	2	2	.	3	3	2	3	.	.	3	3	2	2	2	5	3	5	5	4	3	3	3	3	3	3	1
Poland	2	2	1	23	2	.	.	.	.	4	4	5	4	2	3	3	4	3	.	2	.	4	.	2	2	3	3	5	4	4	1	5	5	5	5	3	4	3	2
Poland	1	2	3	21	1	.	.	.	.	5	3	4	5	5	5	5	.	3	3	1	.	.	1	5	5	2	3	5	5	5	5	5	5	5	5	5	2	2	1
Poland	1	1	2	20	1	1	2	3	3	1	3	3	3	3	2	2	2	3	3	3	3	3	3	4	4	4	4	5	5	5	5	3	3	3	3	3	.	.	.
Poland	2	2	2	21	3	.	4	4	.	4	4	4	3	2	2	2	.	4	4	1	.	.	1	3	2	4	4	5	5	5	5	5	5	4	4	4	4	3	2
Poland	1	1	4	22	1	4	4	.	.	4	4	4	4	3	4	3	3	4	3	3	3	3	3	3	4	4	3	5	5	4	4	4	4	4	4	4	1	4	1
Poland	1	1	2	22	2	3	3	3	3	4	4	3	4	2	.	3	2	3	2	2	2	3	3	2	3	4	3	5	3	5	5	5	5	5	5	5	6	5	1
Poland	1	1	1	20	2	.	.	.	.	4	3	4	4	2	4	.	4	4	.	.	.	.	.	2	4	4	3	5	3	1	5	4	4	4	4	4	1	1	1
Poland	2	2	2	24	2	.	.	.	.	4	2	2	2	1	2	2	2	2	1	3	4	.	.	2	4	2	2	5	4	2	5	4	4	2	5	3	2	1	1
Poland	1	1	1	21	1	.	.	.	.	1	3	3	1	3	1	1	1	1	.	.	.	1	.	1	1	1	1	5	5	5	5	4	4	.	4	3	4	1	1
Poland	2	1	4	21	1	3	3	.	.	3	3	3	3	3	3	3	3	3	3	3	3	3	3	3	3	3	3	4	4	4	4	3	3	3	3	3	2	2	2
Poland	1	1	2	22	2	5	5	5	5	5	5	5	5	5	5	5	5	5	5	.	5	.	.	.	4	5	4	5	5	5	5	5	5	5	5	5	4	4	1
Poland	1	2	2	20	2	3	3	3	4	4	4	4	4	2	3	4	.	3	3	3	3	3	3	4	4	4	3	5	5	5	5	5	4	5	5	5	6	4	1
Poland	1	2	2	20	1	2	4	2	2	4	3	3	2	2	2	4	3	3	4	4	2	.	2	2	2	3	2	5	2	4	4	3	4	4	5	3	3	5	4
Poland	1	2	1	20	2	2	2	2	2	5	2	2	2	2	2	2	2	2	2	2	4	3	2	1	.	.	5	5	4	5	4	4	4	4	4	4	5	4	2
Poland	1	1	4	21	1	.	.	.	.	5	3	4	4	4	2	3	.	4	.	.	.	.	.	3	4	3	4	5	5	5	5	5	5	4	5	4	1	1	1
Poland	1	3	4	.	1	3	3	3	3	3	3	3	3	3	2	2	2	3	3	3	1	3	3	2	2	3	3	3	3	3	3	3	3	3	3	3	.	.	.
Poland	1	2	2	23	2	3	3	3	3	4	4	2	2	4	2	2	4	2	3	3	4	3	3	2	4	3	2	5	4	5	5	4	3	2	4	2	4	4	2
Poland	2	2	2	.	2	.	.	4	.	5	3	4	3	3	4	3	4	4	3	4	5	4	3	3	4	3	3	4	3	4	1	4	3	4	4	3	4	4	1
Poland	1	1	2	21	2	.	.	.	.	4	3	3	3	5	4	.	.	3	.	3	2	.	.	3	2	3	3	5	5	5	5	4	4	4	4	2	2	3	1
Poland	1	1	.	22	2	4	4	4	4	3	2	2	3	3	3	3	3	3	4	3	4	3	3	3	4	4	4	5	4	4	5	4	4	3	4	4	1	1	1
Poland	1	1	2	19	2	.	.	4	.	4	4	4	4	4	4	4	4	4	4	.	.	.	.	2	3	4	3	5	4	5	3	4	4	4	4	4	4	.	1
Poland	1	1	4	20	1	4	4	4	3	2	4	4	.	5	3	2	3	4	2	3	1	.	.	1	2	3	.	5	5	5	5	5	5	5	5	5	1	1	1
Poland	1	1	2	22	2	.	.	.	.	4	.	.	5	5	5	.	.	4	4	.	.	.	.	3	4	4	4	5	5	5	5	5	5	4	4	4	4	1	1
Poland	1	1	2	21	2	4	4	4	4	5	3	4	4	3	4	4	.	4	4	.	.	.	.	4	4	4	4	5	5	5	5	5	4	5	4	4	3	2	1
Poland	2	1	1	21	1	3	2	2	3	3	2	3	2	4	3	.	.	3	1	1	.	.	3	5	4	4	5	5	4	5	5	5	4	5	4	4	5	3	1
Poland	1	2	4	23	2	4	5	.	.	3	4	5	4	4	4	.	.	5	5	3	5	3	3	2	2	1	4	5	5	5	5	4	4	4	4	4	6	3	1
Poland	2	2	1	24	1	1	2	2	2	2	4	4	4	5	4	4	4	5	4	4	3	3	4	4	3	4	3	3	4	3	4	4	3	3	3	2	4	5	5
Poland	2	1	3	23	1	3	3	4	5	4	2	2	1	3	3	.	3	2	.	.	.	3	.	5	5	5	4	5	5	5	1	5	5	5	5	5	5	2	1
Poland	1	1	1	23	2	.	.	.	.	4	4	4	5	3	4	4	5	4	3	.	3	.	.	2	3	2	4	5	5	5	2	4	5	3	5	4	1	1	1
Poland	1	1	1	21	2	4	5	4	4	5	5	4	5	4	4	5	5	4	4	4	1	5	5	5	5	5	4	5	5	5	5	5	5	5	5	5	5	4	2
Poland	1	2	1	24	2	3	3	3	3	4	4	4	4	2	.	4	.	4	3	3	2	.	3	4	4	4	4	5	4	3	2	5	5	4	5	4	3	4	1
Poland	1	1	2	19	2	.	.	.	.	4	3	4	5	4	4	4	3	4	4	3	4	3	3	3	4	4	3	5	4	4	4	5	5	4	5	4	4	3	1
Poland	1	1	1	20	2	4	4	5	5	4	5	4	4	4	4	3	4	5	5	4	3	4	4	4	4	2	3	5	5	5	5	4	4	4	5	4	4	5	2
Poland	1	1	4	22	2	.	.	.	.	2	2	3	1	1	3	3	2	2	1	2	.	2	.	5	4	4	4	5	3	5	5	4	4	4	5	4	2	4	1
Poland	1	1	2	22	2	.	.	.	.	5	4	4	.	3	4	4	3	3	.	2	.	3	4	3	4	4	2	5	4	5	5	5	5	5	5	3	1	1	1
Poland	1	1	2	20	2	.	.	.	.	4	4	4	5	5	4	3	4	4	3	4	3	4	3	4	4	4	4	5	5	4	4	5	5	5	5	4	4	4	1
Poland	1	1	4	22	2	.	.	.	.	2	3	4	3	2	5	3	3	3	.	.	.	.	4	.	4	4	3	5	5	5	5	4	4	4	4	4	4	4	4
Poland	1	1	1	21	2	3	2	4	.	2	2	4	3	4	2	3	.	3	2	2	.	2	3	2	2	2	2	5	2	4	5	2	2	2	3	2	6	4	1
Poland	1	1	4	19	1	1	1	1	1	2	2	4	3	1	1	2	1	3	3	3	3	3	3	1	1	1	1	5	5	5	5	5	4	5	5	3	2	2	1
Poland	1	1	4	23	2	.	.	.	.	4	4	4	4	4	5	2	3	4	5	.	4	.	.	2	3	4	3	5	5	5	5	5	5	5	5	5	4	3	1
Poland	1	1	2	20	2	5	5	5	5	5	5	5	5	5	5	5	5	5	5	5	5	5	5	1	5	5	5	5	5	5	5	5	5	5	5	5	6	2	1
Poland	1	1	1	23	2	.	.	.	.	2	1	1	4	4	2	.	.	3	.	.	.	.	.	1	2	1	1	5	2	4	2	4	4	2	4	3	5	3	1
Poland	1	1	2	20	2	4	4	.	.	4	4	4	4	4	4	4	.	4	4	.	.	.	.	2	3	2	2	5	4	5	5	3	3	3	3	3	4	3	1
Poland	1	1	1	20	2	4	3	4	2	4	4	4	4	2	4	4	3	3	3	3	3	3	3	1	4	4	2	5	5	5	5	4	4	4	4	4	1	1	1
Poland	1	2	1	24	2	.	.	.	.	5	3	1	5	3	1	4	3	4	2	5	3	3	3	2	1	1	1	5	5	5	5	5	5	5	5	5	5	4	2
Poland	1	1	4	23	1	5	5	1	1	4	4	4	4	1	4	1	4	4	4	3	3	4	3	2	3	2	4	5	5	5	1	5	5	5	5	5	1	3	1
Poland	1	1	3	20	2	.	.	.	.	2	2	3	3	2	2	2	.	3	.	.	.	.	.	2	2	2	2	4	4	4	3	3	2	2	3	3	6	4	1
Poland	1	1	2	22	1	3	2	3	2	4	4	4	3	3	5	3	2	3	1	.	.	3	3	1	2	1	1	5	5	5	5	5	1	2	3	3	4	2	1
Poland	1	1	2	23	2	.	2	3	3	4	4	2	1	3	2	1	1	1	1	1	3	1	1	4	1	2	2	5	5	5	5	4	4	4	4	4	4	3	1
Poland	1	1	1	19	2	.	.	.	.	4	2	2	4	2	4	4	.	4	2	2	3	3	3	3	2	2	3	5	4	5	5	5	4	4	5	4	3	2	1
Poland	1	1	4	19	2	.	.	.	.	4	4	4	4	3	3	4	4	.	.	.	.	.	.	3	5	3	.	4	4	5	2	4	4	5	5	5	1	2	1
Poland	1	2	1	20	2	.	.	.	.	4	4	2	2	1	2	3	3	2	2	.	.	2	3	2	1	3	2	5	4	5	5	5	4	3	4	2	6	2	1
Poland	1	1	2	22	2	4	4	4	4	4	4	4	4	4	4	.	.	4	4	4	3	.	.	.	4	4	3	3	3	3	3	3	3	4	4	3	3	2	1
Poland	1	2	3	22	1	2	2	2	2	4	3	4	4	3	2	2	.	3	3	3	3	3	3	1	2	2	2	5	4	5	2	4	2	4	4	1	1	1	1
Poland	1	3	3	41	1	.	.	.	.	5	4	4	4	2	4	3	4	4	4	3	3	3	2	4	4	5	5	4	3	4	4	4	4	4	4	3	4	4	3
Poland	1	1	2	20	2	.	.	.	.	4	4	4	4	4	3	3	3	3	3	3	3	3	3	3	4	4	4	5	5	5	5	4	4	4	4	4	1	1	1
Poland	1	2	2	24	2	5	5	5	5	5	5	5	5	5	2	2	5	5	5	5	5	5	5	4	4	4	4	5	5	5	5	4	4	4	4	4	.	.	.
Poland	1	2	2	20	1	.	.	.	.	5	3	3	2	.	.	.	.	4	4	.	.	.	.	4	4	3	3	5	5	5	5	5	5	4	5	5	1	1	1
Poland	1	1	1	26	2	.	3	.	3	3	1	3	2	3	1	3	3	2	1	4	1	3	3	2	3	3	3	5	3	1	4	4	4	3	4	4	3	3	3
Poland	1	1	2	19	2	3	3	3	3	3	3	3	4	4	4	2	3	5	3	.	.	3	.	3	4	.	3	5	5	5	5	5	4	4	5	5	3	2	1
Poland	1	2	2	24	2	.	.	.	.	1	1	1	1	1	3	1	1	4	.	.	1	.	.	4	5	3	4	5	4	4	5	4	3	3	5	3	1	1	1
Poland	1	1	1	21	1	4	4	4	4	4	5	5	4	4	4	4	4	4	4	3	4	4	4	4	4	4	3	5	5	5	4	4	4	4	5	4	5	4	3
Poland	1	1	1	19	2	.	.	.	.	4	1	.	4	2	1	3	3	4	.	.	4	3	.	2	3	2	2	5	5	5	5	5	5	5	5	5	6	2	1
Poland	1	1	1	24	1	.	.	2	3	4	4	.	4	3	3	1	3	4	.	.	.	.	.	1	2	1	3	5	5	5	5	5	3	3	4	5	4	4	1
Poland	1	2	2	23	2	2	2	3	3	4	4	4	4	4	2	2	2	4	3	.	2	.	.	4	3	3	3	5	4	5	4	4	4	4	4	4	5	3	1
Poland	1	1	3	21	2	3	4	3	4	2	3	3	2	2	3	3	4	2	3	3	2	3	4	3	4	3	3	5	4	5	4	3	3	4	5	4	1	1	1
Poland	1	2	3	24	1	4	.	4	.	5	4	4	4	2	4	4	5	4	.	5	4	4	4	3	3	3	3	5	5	5	5	4	4	4	5	4	3	5	3
Poland	1	2	3	23	2	.	.	.	.	5	4	4	2	1	2	2	.	2	3	.	1	.	.	2	2	1	1	5	4	5	1	5	5	4	4	5	3	4	1
Poland	1	1	4	20	2	.	.	.	.	4	2	3	.	3	2	4	4	3	.	.	.	2	.	2	2	2	2	5	5	5	5	4	3	4	4	2	5	3	3
Poland	1	2	2	30	2	4	.	4	.	5	1	4	4	4	3	3	2	4	.	.	1	2	2	4	5	5	4	5	5	5	5	5	5	4	5	5	3	2	1
Poland	1	3	3	25	1	5	.	.	.	2	4	2	4	5	3	4	5	5	3	1	.	4	.	1	3	2	3	4	3	2	1	5	5	4	5	4	4	2	1
Poland	1	1	3	20	1	.	.	3	.	3	3	3	3	3	3	3	3	3	3	2	3	3	3	2	2	2	2	5	3	5	5	3	3	3	3	3	1	1	1
Poland	1	2	3	24	1	2	3	3	3	4	3	3	3	2	3	2	3	3	3	3	3	3	3	3	2	3	3	4	3	4	2	3	3	3	3	3	3	3	1
Poland	1	1	2	21	2	2	3	4	4	1	4	4	4	4	3	3	2	4	3	2	1	3	2	2	3	4	4	2	3	1	2	2	2	2	2	3	2	6	2
Poland	2	1	4	22	1	3	3	3	3	4	2	4	2	1	2	2	3	2	4	3	3	3	3	3	4	4	4	5	4	5	2	5	5	5	5	5	4	2	1
Poland	1	1	2	19	1	3	3	3	3	4	2	5	4	4	4	4	3	4	5	3	3	3	4	4	4	.	2	5	3	5	5	4	4	4	5	3	3	3	2
Poland	1	1	2	21	2	4	4	4	4	1	4	4	4	2	4	4	3	3	2	3	2	3	3	2	3	1	2	3	3	3	1	4	4	4	4	4	.	.	.
Poland	1	1	2	20	1	.	.	.	.	3	2	4	3	3	2	2	3	3	3	3	3	3	3	2	2	2	2	4	4	4	2	4	4	3	4	3	2	2	1
Poland	1	1	3	21	2	.	.	.	.	4	2	2	4	2	3	3	.	3	3	3	3	.	.	3	3	2	2	5	4	5	5	3	3	2	3	3	2	1	1
Poland	1	1	1	25	2	.	.	.	.	1	1	3	2	3	5	2	2	1	4	4	4	4	4	2	1	1	1	5	5	3	2	5	3	1	5	2	1	2	1
Poland	1	2	4	25	2	1	1	2	2	3	1	2	1	2	3	1	3	3	3	3	.	3	3	1	2	2	2	5	3	5	5	5	5	5	5	3	6	3	1
Poland	1	1	1	46	4	.	.	.	.	4	3	4	4	3	4	3	3	4	3	3	4	3	3	3	3	3	3	4	3	4	5	4	3	3	4	3	2	2	2
Poland	1	1	1	20	2	.	.	.	.	5	4	3	3	5	3	3	5	5	5	.	.	.	.	2	3	2	2	5	5	5	5	5	5	5	5	5	4	3	1
Poland	1	2	2	25	1	.	.	.	.	5	3	4	3	3	2	2	.	2	2	2	1	.	.	3	3	3	3	5	5	5	5	5	5	4	4	4	4	2	1
Poland	1	1	4	21	1	.	.	.	.	3	.	3	2	2	4	2	3	3	.	.	.	3	.	4	4	3	3	5	5	5	5	5	5	5	5	5	1	1	1
Poland	1	3	4	32	2	2	2	1	1	1	3	5	.	2	4	2	1	3	4	.	.	4	.	2	4	2	1	5	5	1	5	5	4	4	4	3	4	3	2
Poland	1	1	2	21	2	.	.	3	3	5	5	5	5	5	4	.	4	4	.	4	.	.	.	3	4	4	3	5	5	5	5	4	4	4	4	4	6	3	1
Poland	1	1	2	20	2	.	4	.	.	2	3	4	5	1	4	.	.	3	.	.	.	.	.	4	2	3	2	5	5	5	5	5	5	5	5	5	1	3	1
Poland	1	1	4	22	2	.	.	.	.	5	1	3	.	1	3	2	3	.	.	.	.	.	.	.	3	3	3	5	5	5	5	5	5	5	5	5	6	2	1
Poland	1	2	1	23	2	.	.	.	.	5	1	2	4	1	2	1	.	2	2	3	1	3	3	1	2	2	1	5	5	5	5	5	5	4	5	4	3	3	1
Poland	1	1	2	20	2	.	.	.	.	5	4	4	4	5	5	5	5	4	4	.	.	4	.	4	5	3	4	5	5	5	5	4	4	4	5	5	4	4	1
Poland	2	1	1	26	2	3	4	3	3	3	4	3	4	3	3	.	3	3	3	3	3	3	3	3	3	3	3	4	3	5	4	4	4	4	4	3	4	2	1
Poland	1	1	1	23	1	.	.	.	.	3	3	4	5	4	4	3	3	5	.	.	.	.	.	4	5	4	3	5	5	5	5	5	5	5	5	5	3	4	3
Poland	1	1	2	20	1	4	3	4	3	4	5	4	4	4	4	4	.	4	4	.	2	4	.	3	2	3	3	5	4	4	4	4	4	4	4	3	3	3	1
Poland	1	2	1	24	2	.	3	.	.	5	4	4	4	4	4	3	.	3	4	1	3	.	.	3	3	4	4	3	4	4	2	5	3	5	5	4	1	1	1
Poland	1	1	1	21	2	3	3	3	3	3	4	4	4	4	2	4	3	4	3	4	5	4	4	4	2	4	4	5	5	5	5	5	5	5	5	5	4	4	2
Poland	1	1	4	20	2	3	3	4	3	3	3	3	4	2	3	3	3	3	3	3	.	3	.	3	4	3	4	5	5	5	5	5	5	5	5	4	3	3	1
Poland	1	2	1	24	2	.	.	.	.	4	4	3	3	3	3	4	5	3	4	4	.	3	.	5	5	3	5	5	5	5	5	5	5	4	5	5	3	3	2
Poland	1	1	4	23	2	.	.	.	.	5	4	4	4	2	4	3	3	4	3	.	3	4	.	3	4	1	1	5	5	5	5	5	4	3	5	4	5	3	1
Poland	1	2	2	23	2	1	1	1	1	1	2	3	2	2	1	1	1	1	1	1	1	1	1	1	1	1	1	1	1	1	1	1	1	1	2	2	.	.	.
Poland	1	2	2	23	1	3	2	2	4	4	4	4	4	4	4	3	3	3	2	4	4	3	5	3	3	3	3	4	4	2	1	4	4	5	2	2	3	3	3
Poland	1	1	4	22	2	.	.	.	.	4	3	4	5	3	4	4	4	4	3	3	3	3	3	2	4	4	3	5	5	5	5	5	5	4	5	4	6	4	1
Poland	1	1	1	23	1	.	.	.	.	4	5	3	4	2	2	2	4	4	1	.	3	3	.	2	1	3	4	3	4	5	5	5	4	4	5	3	4	2	1
Poland	1	1	4	21	1	4	.	.	.	4	4	3	3	2	3	.	3	3	4	.	.	4	.	3	4	2	3	5	5	5	5	5	5	5	5	5	4	4	1
Poland	1	1	4	22	2	2	4	.	.	5	2	3	2	1	3	3	3	3	3	3	3	3	3	3	2	2	1	4	4	1	1	4	3	4	5	4	4	3	1
Poland	1	1	3	20	2	3	3	3	3	4	4	4	4	2	3	2	4	3	3	4	3	4	4	4	3	2	2	5	5	5	5	4	4	4	4	4	4	4	2
Poland	1	1	4	20	1	.	.	.	.	4	4	4	5	1	4	.	4	3	5	3	3	4	3	5	4	4	4	5	5	5	5	5	5	5	5	4	6	3	2
Poland	1	1	3	21	2	3	3	3	.	3	4	4	5	3	4	3	.	4	4	.	3	3	4	4	3	3	.	5	4	4	4	4	4	4	5	3	1	4	3
Poland	1	1	1	25	2	1	4	1	4	2	4	2	1	1	1	1	1	1	1	1	.	1	1	1	2	1	1	5	5	5	5	5	5	2	5	4	6	3	4
Poland	1	1	2	20	2	.	.	.	.	4	3	2	3	3	2	.	.	3	4	3	3	.	3	3	2	3	3	5	4	5	5	4	3	2	3	3	4	3	1
Poland	1	1	2	21	2	4	4	5	5	4	4	4	4	3	4	3	4	4	4	4	4	4	4	4	4	5	4	5	5	3	4	4	4	4	4	4	2	6	3
Poland	1	1	2	21	2	.	.	.	.	3	3	4	3	3	3	.	.	3	3	4	3	.	.	2	2	2	2	5	3	4	4	5	4	3	4	3	1	1	1
Poland	1	1	2	22	1	4	5	5	3	5	5	5	5	5	5	4	4	5	5	.	.	5	5	2	5	2	2	5	5	5	5	5	5	5	5	5	6	4	4
Poland	1	1	4	22	2	.	.	.	.	4	3	4	4	3	4	3	3	3	3	3	3	3	3	3	4	4	3	5	4	4	2	5	5	5	5	4	.	.	.
Poland	1	2	1	23	2	.	.	.	.	4	3	4	4	4	2	4	4	4	3	.	4	4	.	3	3	2	3	5	4	5	5	4	4	4	4	4	6	3	1
Poland	2	2	4	43	2	.	.	.	.	4	5	4	4	4	4	4	4	4	4	4	3	4	2	4	5	4	3	5	5	5	5	3	3	4	5	2	1	1	4
Poland	1	1	4	22	1	.	.	.	.	5	3	4	4	2	2	.	.	.	.	.	.	.	.	2	3	2	.	5	5	5	3	4	2	4	3	3	1	1	1
Poland	1	2	2	23	1	4	4	4	4	2	4	4	4	2	2	2	4	4	3	3	1	3	3	1	4	4	2	5	5	5	5	4	4	5	5	4	1	2	1
Poland	1	1	4	21	2	5	.	5	.	4	3	4	5	4	4	3	4	4	4	4	3	4	2	2	3	2	2	5	5	5	5	4	4	5	5	4	6	4	2
Poland	1	1	4	21	1	4	4	5	5	4	4	4	4	3	4	3	4	4	4	4	4	4	4	4	4	5	4	5	5	3	4	4	4	4	4	4	2	6	3
Poland	1	1	2	21	2	.	.	.	.	5	2	3	4	3	3	3	5	.	3	.	.	5	.	3	3	3	5	5	5	5	5	5	3	5	5	5	6	3	1
Poland	1	1	2	20	2	.	.	.	.	4	3	4	3	3	3	.	.	4	3	.	4	.	3	3	3	2	3	5	5	5	5	5	4	4	5	3	4	2	1
Poland	1	1	2	20	2	3	3	1	1	4	2	1	2	4	3	1	.	3	1	3	.	.	.	2	1	2	1	5	2	4	4	4	4	2	3	3	4	1	1
Poland	1	1	1	21	2	.	.	.	.	3	4	3	4	4	4	3	.	4	.	.	3	.	.	3	4	3	.	5	5	2	1	5	5	4	5	4	1	4	1
Poland	1	1	1	20	1	.	.	.	.	4	4	4	4	4	4	1	.	3	3	3	.	.	3	1	2	3	3	5	4	5	1	4	4	4	4	4	2	3	1
Poland	1	1	2	24	1	5	3	3	3	4	4	3	3	5	2	3	2	4	4	3	2	3	4	1	2	2	3	5	4	5	5	4	4	4	4	3	2	.	1
Poland	1	2	2	23	2	4	5	4	5	4	4	5	4	3	4	4	5	4	4	4	3	4	3	3	4	4	2	5	5	5	5	4	3	4	4	4	4	4	2
Poland	2	1	2	21	2	3	3	2	2	5	4	5	3	3	2	3	4	3	2	3	2	3	4	3	3	3	3	5	5	5	5	4	4	5	5	5	1	3	1
Poland	1	1	1	21	2	.	.	.	.	5	3	4	4	3	2	4	4	4	.	.	.	.	.	3	3	3	2	5	5	5	5	3	3	.	4	3	1	2	1
Poland	1	1	4	23	1	.	.	.	.	4	4	4	4	4	3	4	.	5	.	.	.	4	.	5	5	5	5	5	5	5	5	5	5	5	5	5	2	1	1
Poland	1	1	4	21	1	3	2	3	2	4	3	5	5	5	4	3	.	4	2	3	4	.	.	2	4	3	3	5	5	5	5	5	5	5	5	5	5	4	1
Poland	1	1	1	19	2	.	3	4	4	3	3	3	3	3	4	3	3	3	4	3	4	4	1	2	3	3	3	5	5	5	5	3	3	4	5	3	3	1	1
Poland	1	1	2	20	2	.	.	.	.	4	4	4	4	3	4	4	4	4	4	.	5	.	.	3	3	4	.	5	5	4	5	4	4	4	4	4	5	3	1
Poland	1	1	3	21	2	3	.	.	.	4	4	.	4	4	3	2	.	4	4	.	.	.	.	4	4	3	4	5	5	5	5	4	3	4	5	4	4	1	1
Poland	1	2	3	21	2	.	.	.	.	4	2	3	3	3	2	2	.	2	3	4	3	.	.	3	2	1	3	5	5	4	5	4	3	4	4	4	4	2	2
Poland	1	1	1	22	2	4	4	4	3	4	4	4	4	4	4	4	4	5	4	4	4	4	4	3	4	4	3	5	5	4	5	4	4	4	4	4	3	4	1
Poland	1	1	4	20	1	.	.	.	.	4	2	2	.	4	3	2	.	3	.	.	.	.	.	1	5	1	1	5	5	5	5	5	5	5	5	5	6	4	1
Poland	1	3	3	27	2	5	3	5	3	3	3	2	3	2	3	3	3	4	4	4	4	3	3	4	4	4	4	4	4	4	2	4	4	5	5	5	6	1	1
Poland	1	1	4	20	2	.	.	.	.	3	3	4	4	4	3	2	2	2	.	.	.	.	.	1	1	1	1	5	3	5	5	5	5	5	5	2	.	3	1
Poland	1	1	2	24	2	.	3	.	3	5	3	4	4	4	3	3	3	3	3	3	3	3	3	2	3	3	3	5	5	5	5	4	4	3	3	3	4	4	1
Poland	1	1	1	23	2	.	.	.	.	4	5	4	4	3	2	4	4	4	.	.	.	.	.	3	4	3	3	5	5	5	5	5	5	5	5	5	6	4	1
Poland	1	1	2	20	2	.	.	.	.	3	3	4	4	5	3	.	.	3	3	.	.	.	3	4	.	3	3	5	4	5	5	2	2	4	4	3	3	1	1
Poland	1	1	4	22	2	.	.	.	.	3	2	3	4	1	2	2	.	.	.	.	.	.	.	2	3	2	1	4	4	4	2	4	4	4	4	4	4	4	2
Poland	1	1	3	22	2	.	.	.	.	2	3	3	2	2	2	2	2	2	1	1	1	1	4	3	4	1	3	5	4	5	5	4	4	4	4	3	3	1	2
Poland	2	1	1	20	2	3	.	.	.	1	3	4	4	3	3	.	.	3	3	3	3	3	3	2	3	4	2	4	4	5	5	5	4	4	5	4	2	2	1
Poland	1	1	4	22	1	.	5	.	.	3	4	3	3	1	3	3	2	3	2	.	5	.	.	4	3	1	.	4	3	1	5	5	5	4	5	4	4	2	2
Poland	1	1	2	22	2	4	2	3	2	2	1	3	2	1	3	3	.	3	1	2	2	.	2	3	4	3	4	5	4	5	5	5	.	5	5	5	5	2	2
Poland	1	2	2	23	2	4	4	2	3	5	3	3	3	2	2	2	2	2	3	4	1	2	5	2	4	2	4	2	5	4	5	3	3	3	1	3	3	2	3
Poland	1	1	2	21	1	.	.	.	.	1	1	1	1	1	1	.	.	.	.	.	.	.	.	3	1	1	2	4	2	4	4	3	3	3	3	1	2	1	1
Poland	1	1	1	24	1	.	2	.	.	4	3	.	2	4	1	1	.	1	4	5	.	.	.	1	1	1	3	5	4	5	5	4	4	3	4	3	3	2	2
Poland	1	3	4	28	1	2	.	4	.	4	1	4	4	2	4	4	3	3	2	.	.	.	.	2	2	4	.	5	5	5	5	5	4	4	5	5	1	1	1
Poland	1	1	1	22	2	.	.	.	.	5	4	4	5	4	5	2	3	3	2	.	3	3	3	2	3	3	3	5	5	5	5	5	3	5	5	5	4	3	1
Poland	1	2	4	25	1	4	4	4	4	5	5	4	4	5	5	5	5	5	1	5	4	1	5	3	4	3	4	5	1	3	3	5	5	5	5	5	6	4	3
Poland	1	1	1	21	1	.	.	.	.	4	3	4	5	4	3	3	3	3	3	3	3	3	3	2	3	3	4	5	5	5	5	5	5	4	5	5	4	4	1
Poland	2	1	1	40	1	2	.	2	1	4	4	4	4	4	3	2	2	3	4	3	3	3	3	2	3	1	3	4	5	4	5	4	4	3	4	4	3	3	2
Poland	1	1	2	22	2	4	4	4	4	4	4	4	4	4	4	4	4	4	3	3	2	4	4	3	4	3	4	5	5	5	5	4	4	4	4	4	3	3	1
Poland	1	2	4	24	2	5	5	5	5	4	4	4	4	3	5	5	5	4	3	3	3	3	4	4	5	5	5	5	5	5	1	5	5	5	5	5	1	1	1
Poland	1	1	4	23	2	.	.	.	.	1	2	3	3	1	5	2	.	3	3	2	3	.	.	2	3	3	3	3	3	4	2	4	3	4	4	2	4	.	1
Poland	1	1	2	20	2	.	4	.	.	5	5	5	5	5	.	4	.	4	.	.	4	.	.	5	4	4	3	5	5	5	5	4	4	4	4	4	4	4	1
Poland	1	1	2	19	2	.	4	.	4	4	3	.	4	4	4	3	.	3	3	3	2	.	.	2	3	3	2	3	2	5	5	5	4	4	5	3	3	3	1
Poland	1	1	4	21	2	.	.	.	.	3	3	4	.	2	4	2	.	3	.	.	.	.	.	3	3	2	.	5	4	4	5	4	4	4	5	3	3	2	1
Poland	1	2	3	21	2	4	4	4	4	4	2	2	4	4	4	3	3	3	3	3	3	3	3	4	4	4	4	5	5	5	1	4	4	4	4	4	1	4	2
Poland	1	1	4	20	2	.	.	.	.	3	2	2	1	1	3	2	1	2	3	4	4	2	.	3	3	1	1	4	3	3	3	4	3	3	4	2	4	2	1
Poland	1	1	2	19	2	4	.	3	.	2	3	4	4	3	1	.	2	3	2	3	3	3	3	1	3	2	1	5	3	5	4	4	3	3	4	3	1	1	1
Poland	1	1	4	21	1	1	1	1	1	2	1	4	2	2	1	1	1	4	4	3	3	3	3	2	4	4	3	5	5	5	1	4	4	4	4	4	5	1	1
Poland	1	1	3	22	2	5	5	5	5	5	5	5	5	4	5	4	4	4	4	2	4	3	3	3	4	4	3	4	5	4	3	5	5	5	5	5	4	4	3
Poland	1	1	2	21	1	3	3	3	3	3	3	3	3	3	2	3	4	3	2	3	3	4	2	3	2	4	4	5	5	5	5	5	5	5	4	4	1	1	3
Poland	1	1	2	22	2	1	1	.	.	4	3	.	2	4	3	.	3	2	3	.	3	.	.	3	4	4	4	5	2	5	1	5	5	4	5	4	1	1	1
Poland	1	1	1	24	2	.	.	.	.	1	2	1	2	3	4	2	2	2	2	2	2	2	2	3	3	4	4	5	2	2	2	4	4	4	4	4	4	3	1
Poland	1	1	3	20	2	5	.	4	.	4	3	4	4	4	4	3	.	3	3	4	.	.	.	3	4	2	4	5	5	5	5	5	4	4	4	4	4	1	1
Poland	1	3	3	24	2	.	.	.	.	5	5	5	5	5	5	5	5	5	5	5	5	5	5	5	5	5	5	5	5	5	5	5	.	5	5	5	6	2	.
Poland	1	1	1	21	2	.	3	.	3	5	2	5	5	2	3	3	3	3	3	2	2	3	2	3	4	4	4	5	3	3	5	5	5	5	5	4	3	4	2
Poland	1	2	1	20	2	.	.	.	.	4	4	.	4	2	4	2	.	3	4	.	.	.	.	1	2	3	1	5	3	5	5	4	4	4	4	3	6	3	1
Poland	1	1	1	21	2	4	5	3	3	4	2	3	3	3	4	4	.	2	2	.	.	.	.	1	2	2	2	5	2	5	3	4	3	4	4	3	6	3	1
Poland	1	1	4	19	2	4	.	4	.	4	3	2	3	2	2	2	3	3	3	3	2	.	.	1	3	2	2	5	5	3	3	5	5	3	5	3	.	.	.
Poland	1	1	1	19	1	.	.	.	5	5	4	5	4	5	5	4	5	4	2	.	.	4	.	3	1	3	2	5	5	5	3	5	5	5	5	5	6	4	1
Poland	2	3	4	42	1	3	3	3	3	3	3	4	4	4	4	4	3	3	3	.	3	4	3	2	3	3	2	5	4	5	4	4	4	4	4	4	3	2	2
Poland	1	1	4	22	2	.	.	.	.	5	4	4	4	4	3	3	.	4	.	.	.	.	.	3	2	2	3	4	4	4	4	4	3	2	4	3	4	4	1
Poland	1	1	2	23	1	3	5	3	3	4	3	4	3	4	2	2	2	2	2	2	1	3	3	1	3	3	4	5	4	5	4	5	5	5	5	4	3	4	2
Poland	1	1	2	21	2	4	3	.	.	3	3	4	4	3	4	.	.	3	3	3	3	3	3	3	3	3	4	4	4	5	4	4	3	4	4	4	3	4	2
Poland	1	1	4	21	1	.	.	.	.	5	5	4	4	4	4	2	2	3	2	3	3	4	3	3	4	4	4	5	5	5	3	5	5	5	5	5	5	4	2
Poland	1	1	2	21	1	.	.	.	.	2	4	4	5	5	2	.	.	3	2	.	.	.	3	1	3	2	3	5	2	5	5	5	5	4	5	3	6	2	1
Poland	1	1	1	19	2	.	.	.	.	3	3	3	4	4	3	2	.	2	3	3	3	3	3	2	2	3	3	5	5	5	5	5	4	3	4	3	6	1	1
Poland	1	2	2	.	2	.	3	.	.	3	3	2	3	2	2	.	3	3	2	2	3	3	2	2	2	2	2	5	4	4	4	5	4	4	5	4	4	3	.
Poland	1	2	4	24	2	.	.	.	.	4	4	4	3	1	3	2	2	3	3	.	3	2	3	1	2	2	4	5	3	5	4	5	5	5	5	5	4	4	1
Poland	1	1	1	23	2	1	1	1	1	5	2	3	3	2	1	1	1	1	1	3	3	1	1	1	1	1	1	5	3	1	1	5	3	1	3	3	4	1	1
Poland	1	1	1	20	2	2	2	1	3	2	3	1	3	3	2	1	1	1	2	2	3	4	4	4	.	.	.	4	1	2	3	1	3	4	4	4	1	1	1
Poland	1	1	1	21	1	4	4	3	4	2	3	2	4	4	.	.	.	.	.	.	.	.	.	2	3	1	1	5	5	5	1	5	5	5	4	5	5	4	3
Poland	1	1	4	20	2	.	4	.	.	5	3	2	5	3	4	3	.	3	.	.	.	3	.	2	2	2	2	5	4	1	1	4	3	4	4	3	2	3	1
Poland	1	2	2	24	2	.	.	.	.	4	4	4	4	4	4	4	4	4	4	4	4	4	4	3	4	4	3	5	5	5	5	4	4	2	4	4	4	4	3
Poland	1	1	2	20	2	2	3	2	2	3	2	3	3	4	4	3	2	3	2	.	2	.	.	3	3	3	2	5	3	3	3	4	3	3	4	3	2	3	1
Poland	1	1	1	22	2	3	3	3	3	4	4	3	3	2	2	.	.	.	.	.	.	.	.	1	2	3	3	4	3	4	4	3	3	4	3	3	2	6	1
Poland	1	1	2	20	2	.	.	4	.	4	3	5	4	4	4	4	3	4	4	.	.	.	.	3	2	2	2	5	4	5	5	5	5	4	4	4	5	4	1
Poland	1	1	2	19	2	.	.	.	.	1	1	1	1	1	2	2	.	1	2	2	.	.	1	3	4	2	2	5	3	2	1	3	2	4	4	3	1	1	1
Poland	1	1	2	19	2	.	.	.	.	1	1	1	1	1	2	2	.	1	.	.	.	.	1	4	4	2	1	5	2	2	1	4	4	4	4	2	1	1	1
Poland	1	2	1	24	2	2	2	2	2	2	2	1	3	4	4	5	3	3	1	3	.	.	4	4	4	4	4	3	3	1	3	4	4	2	4	3	.	1	1
Poland	1	1	1	26	2	.	.	.	.	4	2	5	5	2	4	3	2	4	2	2	.	4	.	3	4	4	4	5	5	5	5	5	4	5	5	4	5	4	1
Poland	1	1	2	22	2	4	4	4	5	4	4	4	4	4	5	4	4	4	4	4	3	4	3	.	4	5	3	2	2	3	3	1	3	3	3	3	.	.	.
Poland	1	1	2	20	2	5	5	.	.	4	3	3	2	3	5	.	4	3	3	3	3	3	3	3	4	3	3	5	4	2	5	4	4	4	4	3	1	3	1
Poland	1	1	3	23	1	.	.	.	.	5	3	4	3	3	3	2	3	3	3	3	3	4	3	3	2	2	4	5	4	5	5	5	5	5	5	5	4	4	1
Poland	1	2	1	23	2	.	.	.	.	5	4	5	4	5	2	4	.	4	.	.	.	.	.	3	5	4	2	5	5	5	5	5	5	5	5	5	6	3	1
Poland	1	1	1	20	1	2	2	2	2	3	3	3	4	4	3	3	3	3	3	3	3	3	3	1	3	1	1	4	4	4	2	4	3	3	3	3	1	1	1
Poland	1	1	2	20	2	.	.	.	.	4	4	4	4	4	4	4	4	4	4	4	4	4	4	3	4	4	4	5	5	5	5	4	4	4	4	4	4	5	1
Poland	1	2	3	21	2	.	.	.	.	2	3	4	4	1	4	3	.	4	.	4	.	3	4	2	3	3	3	5	4	5	3	5	4	4	5	4	6	4	1
Poland	1	1	4	20	2	.	.	.	.	3	2	3	3	4	3	2	.	4	3	.	4	.	.	2	3	3	2	5	5	5	4	5	4	4	4	3	3	3	1
Poland	1	1	1	20	2	3	3	3	3	2	4	3	3	3	4	3	.	3	.	.	.	.	.	3	3	4	3	5	4	4	1	3	4	4	4	3	5	4	2
Poland	1	1	4	20	2	3	3	3	3	1	1	1	.	3	3	3	3	3	3	3	3	3	3	3	3	3	3	5	5	3	5	4	2	3	3	3	2	3	3
Poland	1	2	2	25	2	.	.	.	.	3	5	4	4	3	3	3	.	.	.	.	1	.	.	.	2	1	1	5	2	5	5	5	4	1	5	1	3	1	1
Poland	1	1	1	20	2	.	.	.	.	4	4	4	3	2	2	3	.	3	.	.	2	.	.	2	3	3	3	4	3	5	2	4	4	4	4	4	2	3	1
Poland	1	3	4	26	2	.	.	.	.	4	4	2	3	.	3	2	.	4	.	.	4	5	.	5	5	.	.	5	5	5	5	5	5	4	5	4	.	1	1
Poland	1	2	3	22	1	.	3	.	3	5	4	4	3	5	2	2	4	3	2	4	4	.	.	2	5	1	1	5	5	5	3	4	4	4	4	3	5	4	2
Poland	1	1	2	21	2	2	3	3	3	3	3	3	3	2	4	4	4	3	4	3	2	3	3	3	2	3	4	5	2	2	2	3	3	3	4	3	4	3	3
Poland	1	1	4	21	2	.	.	.	3	5	3	4	3	1	3	2	3	4	4	3	.	4	.	4	3	3	2	5	4	4	4	4	4	4	4	4	3	3	1
Poland	1	1	1	20	2	.	.	.	.	4	4	.	3	4	3	2	.	5	.	.	.	.	.	3	2	3	3	5	4	4	5	4	3	3	4	3	3	2	1
Poland	1	2	2	23	2	3	3	3	3	4	2	3	3	1	2	3	3	3	2	1	3	3	3	2	4	3	3	5	5	5	5	4	4	3	4	3	3	3	1
Poland	1	2	2	25	2	.	.	.	.	3	.	.	3	.	.	.	.	.	.	.	.	.	.	.	.	.	.	1	1	4	1	1	1	1	1	1	.	3	2
Poland	1	2	1	26	2	.	.	.	.	.	4	4	.	.	.	.	4	4	4	.	4	.	.	.	3	2	4	5	3	1	5	4	4	1	5	4	2	4	1
Poland	1	2	1	20	2	2	2	2	2	2	3	2	3	1	2	2	2	3	2	3	3	3	3	3	1	2	1	5	4	3	2	2	3	3	4	3	1	1	1
Poland	1	1	3	20	2	3	3	3	3	3	3	4	3	2	4	3	3	3	4	3	3	4	3	3	3	3	3	5	5	5	4	3	3	4	4	4	4	4	1
Poland	1	2	2	25	2	.	.	.	.	.	.	.	.	1	1	1	1	1	1	.	1	1	1	.	.	1	1	5	4	4	5	4	4	4	5	3	2	1	1
Poland	2	2	1	29	1	2	2	3	3	4	4	3	3	2	3	3	3	3	3	4	3	3	3	3	4	4	3	5	5	5	5	5	5	5	5	5	2	3	3
Poland	1	1	2	21	1	.	.	.	.	3	2	3	3	1	2	2	2	2	1	2	3	2	2	1	2	3	3	4	3	4	4	4	4	3	3	3	3	3	2
Poland	1	1	3	23	2	.	.	.	.	4	4	4	4	3	5	4	4	4	3	5	1	3	1	3	5	4	3	5	5	5	5	3	3	4	4	4	4	2	1
Poland	1	1	1	20	2	.	.	.	.	4	4	4	4	4	4	.	.	4	4	4	.	.	.	3	4	4	3	3	3	2	2	3	3	4	4	3	4	2	1
Poland	1	1	2	21	2	1	1	.	.	4	2	4	3	2	2	.	.	4	4	.	4	.	.	2	4	3	4	5	5	5	5	5	4	4	5	4	5	3	1
Poland	2	2	2	23	2	5	4	4	.	5	5	5	5	5	5	4	5	5	5	4	3	.	.	3	4	4	4	5	5	2	2	5	5	4	5	3	5	2	1
Poland	1	1	2	23	2	5	.	.	.	2	4	1	2	3	1	1	1	2	.	.	1	1	.	1	3	3	4	5	5	5	5	5	5	5	5	5	2	3	1
Poland	1	1	2	20	1	4	5	4	5	4	3	4	3	4	3	4	3	4	4	4	4	3	4	3	3	4	3	4	3	2	2	3	3	4	3	4	5	2	3
Poland	1	1	2	20	1	2	2	2	2	2	4	4	5	4	4	3	3	4	3	3	3	3	4	2	2	2	2	5	5	5	5	4	4	4	4	4	3	1	1
Poland	1	2	2	24	2	4	4	5	5	4	4	3	2	4	2	4	3	2	1	3	2	3	4	2	2	2	3	5	5	4	2	4	.	4	4	3	3	4	4
Poland	1	1	2	21	2	4	3	5	4	3	4	3	4	4	4	4	4	4	4	2	2	4	4	4	4	4	3	5	4	4	1	5	3	5	4	4	4	3	1
Poland	1	1	4	20	2	5	.	4	.	4	4	.	3	3	4	4	.	4	4	4	.	.	.	2	4	4	3	5	5	1	1	4	4	4	4	3	6	4	1
Poland	1	1	4	19	2	5	4	.	.	4	1	2	3	4	4	3	.	4	4	4	4	3	4	2	2	2	2	5	2	5	1	4	4	3	4	3	6	2	2
Poland	1	1	4	20	2	5	.	.	.	4	4	5	5	5	5	5	5	4	4	4	2	.	.	3	4	3	3	5	5	5	5	4	4	4	4	4	6	4	1
Poland	1	1	2	21	2	.	.	.	.	5	5	4	5	4	5	.	.	5	4	.	3	4	.	4	4	5	4	5	5	5	5	5	5	5	5	5	5	4	1
Poland	1	1	4	19	2	5	4	5	4	1	2	2	4	2	2	1	.	3	.	.	.	.	.	2	3	1	1	5	5	5	5	3	3	2	4	2	6	4	1
Poland	1	1	4	19	1	5	.	4	.	4	3	4	5	4	4	3	3	4	3	3	.	3	3	3	4	4	4	5	5	5	5	5	5	5	5	5	6	5	2
Poland	1	1	2	22	2	4	.	.	.	3	3	3	1	1	2	2	.	2	3	2	1	2	2	1	2	2	2	4	2	2	2	4	4	4	4	5	4	2	2
Poland	1	1	1	19	2	.	.	.	.	3	2	3	3	1	3	2	.	3	3	3	.	.	.	3	3	2	2	5	5	5	5	4	4	4	4	4	5	4	1
Poland	1	2	2	25	2	1	1	2	2	2	2	2	1	1	1	1	1	1	1	3	1	1	1	3	3	3	1	5	3	3	3	5	5	1	1	1	5	3	1
Poland	1	1	2	19	2	1	3	2	.	.	3	2	2	3	3	2	2	2	4	2	3	2	2	3	3	4	4	5	5	5	5	4	4	3	5	4	3	1	1
Poland	1	2	1	25	2	.	.	.	.	4	4	.	4	3	4	4	4	4	4	.	.	.	.	4	4	4	3	5	5	5	5	4	4	3	4	4	6	1	2
Poland	1	1	4	20	2	1	1	1	1	5	1	1	1	1	1	1	1	1	1	1	1	1	1	1	1	5	4	5	3	5	5	5	5	1	5	3	1	3	1
Poland	1	1	3	23	1	4	3	4	3	4	3	2	4	4	4	4	3	4	4	.	4	.	.	3	4	4	4	5	3	4	4	4	4	5	5	4	1	3	2
Poland	1	1	4	21	1	.	.	.	.	2	1	1	1	1	.	.	.	1	.	.	.	.	.	1	1	1	5	5	5	5	1	5	5	5	5	5	4	1	2
Poland	1	1	4	20	2	5	.	5	.	2	3	4	5	3	5	2	.	4	5	.	.	.	.	3	4	2	3	5	4	4	4	4	4	4	4	3	6	2	1
Poland	1	1	1	21	1	.	.	.	.	4	3	3	4	4	5	4	.	5	3	.	.	4	4	3	4	3	3	5	5	5	5	5	4	5	5	4	5	5	5
Poland	1	1	4	21	2	.	.	.	.	2	3	2	4	1	2	2	1	3	3	5	3	.	.	3	3	2	2	5	3	5	5	4	4	4	4	2	2	2	.
Poland	1	2	4	24	2	3	3	.	.	3	3	3	3	3	2	.	.	3	4	3	1	.	.	2	2	2	2	5	5	5	5	4	4	4	4	4	4	1	1
Poland	2	1	1	21	2	1	4	3	3	4	2	2	3	2	1	2	2	2	3	3	3	1	1	1	2	2	2	5	5	5	5	3	2	2	3	2	4	4	1
Poland	.	.	.	.	.	1	1	1	1	5	3	5	.	1	3	3	3	3	3	3	3	3	3	2	3	3	3	3	3	3	3	3	3	3	3	3	1	1	1
Poland	1	1	1	22	2	.	.	.	.	4	4	2	1	2	1	1	1	2	4	1	.	.	.	5	1	1	1	3	2	5	5	5	5	4	5	1	2	2	1
Poland	1	2	2	22	2	5	.	3	.	5	3	3	4	5	4	3	.	4	5	4	3	5	4	4	3	4	3	5	5	3	5	5	4	5	5	4	5	3	1
Poland	1	1	2	23	2	.	2	.	.	2	2	4	2	4	2	.	2	2	.	.	.	.	.	2	2	4	2	5	4	2	1	4	2	2	4	2	3	1	1
Poland	1	1	2	19	2	.	.	.	.	4	3	4	4	3	4	3	.	4	4	.	.	3	3	3	4	3	2	4	4	5	5	4	3	4	5	4	4	4	1
Poland	1	1	2	19	2	4	4	.	.	4	3	4	3	2	3	4	4	4	.	.	.	.	.	1	3	3	2	5	4	5	5	5	3	4	5	3	4	2	1
Poland	1	1	4	20	2	4	4	4	4	3	3	3	3	3	4	3	4	3	4	3	3	4	4	3	4	4	4	4	.	2	3	3	3	3	4	3	3	2	5
Poland	1	1	4	20	1	.	.	.	.	1	1	3	3	1	1	2	3	3	1	.	3	3	3	1	1	2	2	5	4	2	1	5	5	5	5	5	5	2	1
Poland	1	1	4	20	1	.	.	.	.	5	5	5	5	4	5	5	5	5	5	.	.	.	.	4	5	4	3	5	5	5	5	5	5	5	5	5	6	6	4
Poland	1	2	2	22	1	.	.	.	.	2	2	4	.	4	1	2	3	2	2	5	.	.	.	1	3	1	2	5	5	5	5	4	4	4	4	4	.	.	.
Poland	1	1	1	21	2	.	5	.	.	5	5	5	5	5	3	4	.	4	5	.	4	5	4	3	2	3	3	5	5	5	5	5	5	5	5	5	4	4	2
Poland	1	1	4	21	2	4	.	1	1	5	4	5	5	4	4	1	3	5	.	.	.	.	.	1	3	3	3	5	4	5	5	5	4	5	5	4	1	1	1
Poland	1	1	2	20	1	3	3	3	3	3	3	3	3	3	4	4	4	4	4	4	4	4	3	4	3	3	3	4	3	3	4	3	3	4	3	3	5	5	5
Poland	2	1	2	21	2	.	.	.	.	3	3	3	4	3	3	3	3	4	3	3	.	3	.	2	2	2	2	5	4	5	5	3	3	4	4	3	4	3	1
Poland	1	3	4	25	2	4	.	4	.	2	.	4	4	2	2	2	4	3	4	4	.	5	.	2	3	.	.	5	5	5	5	4	5	5	.	5	3	1	1
Poland	1	2	2	21	1	.	.	.	.	2	1	4	2	1	3	.	.	2	.	.	.	.	.	1	3	1	1	5	5	5	1	4	5	4	5	3	4	3	1
Poland	1	1	2	21	2	.	.	.	.	4	4	4	4	3	4	4	.	4	3	.	.	.	.	3	4	4	3	5	5	4	5	5	3	4	5	3	2	3	1
Poland	1	2	2	25	1	3	3	4	3	3	3	3	3	3	3	3	3	3	3	3	2	4	4	2	3	2	3	5	3	5	5	4	4	4	4	4	3	2	1
Poland	1	1	4	22	1	.	.	.	.	4	4	2	1	1	2	3	3	3	.	2	.	.	.	2	1	4	4	5	2	5	1	4	4	4	4	4	5	3	1
Poland	.	1	4	23	1	.	.	.	.	2	2	3	2	5	3	3	3	4	3	3	4	3	3	2	5	5	5	5	.	5	5	1	1	1	1	1	3	4	1
Poland	2	2	2	24	2	.	.	.	.	2	4	3	4	3	3	3	.	2	.	.	.	.	.	4	3	5	2	4	3	4	5	5	5	4	5	3	4	2	1
Poland	1	1	2	20	2	.	.	.	.	4	3	4	2	2	3	4	.	4	.	.	.	.	.	2	4	3	2	5	5	5	5	4	4	4	4	4	5	2	1
Poland	1	2	1	22	2	4	4	4	4	4	3	3	4	3	4	3	3	4	3	.	4	3	2	2	3	3	3	3	3	3	2	3	3	3	3	3	3	3	3
Poland	1	1	2	23	1	5	4	5	4	3	2	2	1	1	1	1	3	2	4	4	3	3	5	4	5	4	3	5	1	5	4	5	4	4	5	4	1	1	1
Poland	1	2	2	23	2	.	5	.	4	2	2	4	3	2	4	1	.	2	1	.	1	.	.	1	1	2	4	4	4	2	1	3	3	1	4	1	6	3	1
Poland	1	1	4	22	1	.	.	.	.	3	4	4	4	3	3	2	.	3	.	.	.	.	.	4	4	3	2	5	5	5	5	4	4	5	5	4	6	4	1
Poland	1	2	3	22	2	.	.	.	.	3	2	2	1	2	2	1	.	3	3	3	.	2	3	3	3	1	2	5	4	4	4	4	4	4	4	3	3	2	1
Poland	1	1	3	21	2	3	2	3	3	3	3	3	4	4	2	4	3	2	3	2	3	3	3	3	2	2	1	5	5	5	3	3	3	4	4	3	1	1	1
Poland	1	1	3	22	1	.	.	.	5	5	4	4	3	.	.	5	.	3	5	5	5	.	5	2	4	3	.	5	5	5	5	4	4	3	4	4	1	1	1
Poland	1	1	4	22	2	.	.	.	.	4	4	5	3	2	3	4	4	4	.	.	.	.	.	3	4	4	4	5	5	5	5	4	4	4	5	4	5	2	2
Poland	1	2	3	24	1	.	.	.	.	4	4	4	4	4	4	2	3	3	4	.	.	3	3	2	1	2	1	5	5	4	5	4	4	4	5	4	5	3	1
Poland	1	1	2	21	2	3	3	5	.	4	4	.	3	4	3	3	4	4	4	.	.	.	.	4	3	2	3	5	4	4	4	4	4	4	4	4	3	1	1
Poland	1	1	2	23	2	.	.	.	.	4	4	4	4	4	4	.	4	4	3	3	3	3	3	2	4	4	3	5	5	5	5	4	3	4	4	4	6	4	1
Poland	1	1	3	21	2	.	.	.	.	.	.	.	.	.	3	3	3	3	3	3	.	.	.	4	4	4	.	5	5	5	5	.	.	.	.	.	3	2	1
Poland	1	1	2	21	2	.	.	.	.	1	2	3	3	3	4	2	2	3	3	3	3	3	3	3	3	3	2	5	4	4	3	5	3	5	5	3	4	3	1
Poland	1	1	1	23	1	.	.	.	.	5	4	4	4	1	3	2	3	4	.	.	1	3	.	2	2	2	2	5	5	5	5	5	5	5	5	5	4	4	1
Poland	1	1	2	21	2	.	.	.	.	4	1	3	3	4	2	2	2	2	.	.	.	.	.	3	2	2	2	5	4	5	5	4	4	4	4	2	3	4	1
Poland	1	2	2	19	2	.	.	.	.	4	2	4	3	3	4	4	.	4	5	.	.	.	.	3	3	3	4	5	5	5	5	4	4	4	4	4	5	4	1
Poland	1	1	1	23	2	4	4	.	.	4	3	1	3	4	4	4	1	3	.	.	.	3	.	3	4	4	3	5	5	5	5	5	4	4	3	4	4	3	1
Poland	1	1	4	21	2	.	3	.	.	5	4	5	4	2	4	3	.	3	3	4	.	.	3	5	3	3	4	5	4	3	1	5	3	4	5	4	6	3	2
Poland	1	2	1	19	1	.	.	.	.	5	4	3	4	3	3	3	3	4	2	.	.	3	.	3	2	3	2	5	4	5	1	4	4	4	4	3	4	4	2
Poland	1	1	1	42	1	.	.	.	.	4	5	5	5	4	4	4	4	5	3	.	2	.	.	3	3	3	3	4	4	4	4	4	4	4	4	4	6	4	1
Poland	1	1	4	21	1	.	.	.	.	4	1	4	4	1	1	1	1	1	2	.	.	3	1	1	5	5	1	5	5	5	5	5	5	5	5	5	1	1	1
Poland	1	2	1	23	1	.	.	.	.	5	4	5	4	4	4	3	.	4	4	.	.	3	.	3	4	4	3	5	5	2	5	4	4	4	5	4	5	2	1
Poland	1	1	1	20	2	.	3	.	3	3	4	4	3	4	3	4	3	4	3	.	.	3	.	3	2	2	2	5	5	5	4	5	4	4	4	4	6	3	1
Poland	1	2	2	22	2	3	3	3	3	5	2	3	4	2	4	3	.	4	5	3	2	.	.	2	4	4	4	5	4	5	4	4	4	4	4	4	2	2	2
Poland	1	1	2	20	2	5	3	5	3	4	1	2	1	1	4	1	.	2	1	.	.	.	.	2	3	1	3	5	3	4	5	5	3	4	3	3	3	4	1
Poland	1	2	1	24	2	3	4	3	4	4	4	3	5	5	5	5	3	3	3	3	3	5	3	3	3	3	2	3	3	2	2	4	4	3	4	3	4	4	2
Poland	1	1	3	24	2	.	.	.	.	3	4	5	5	1	5	5	4	5	4	4	.	.	.	4	5	5	4	5	4	5	5	4	4	4	4	4	6	5	1
Poland	1	1	1	22	2	.	.	.	.	5	3	3	3	4	4	3	3	3	3	3	1	3	3	3	4	4	4	5	3	4	1	5	4	4	4	4	.	.	.
Poland	2	2	2	32	2	3	3	.	.	4	4	4	4	1	3	2	3	3	5	.	4	.	.	1	3	2	3	5	3	1	1	4	3	4	4	4	2	2	2
Poland	1	1	2	20	1	5	4	4	4	5	5	4	3	3	4	4	.	4	5	.	.	.	.	4	3	3	3	5	5	5	5	5	3	5	5	5	4	4	1
Poland	2	2	2	53	1	3	3	2	2	3	4	4	3	3	2	2	3	.	2	2	2	2	3	3	4	4	4	4	3	4	3	3	3	3	3	3	2	2	2
Poland	1	.	3	35	2	3	.	.	.	4	4	3	4	4	3	2	4	4	2	3	3	3	3	2	3	4	2	5	3	3	3	4	4	4	5	3	4	4	2
Poland	1	1	1	21	1	3	5	3	3	5	4	4	4	3	3	4	2	3	1	2	3	2	2	2	1	2	2	5	5	5	5	5	5	2	3	3	3	1	1
Poland	1	3	4	26	1	.	.	.	.	4	4	4	3	4	4	.	4	4	4	4	3	4	3	3	4	3	4	5	4	5	5	5	5	3	4	4	3	3	1
Poland	1	1	1	21	2	1	.	2	2	4	3	4	3	3	2	3	3	3	1	3	4	3	2	2	2	2	1	5	5	4	3	3	3	4	4	4	4	4	1
Poland	1	2	3	22	2	.	.	.	.	4	4	3	5	3	5	4	4	4	3	3	3	4	3	4	4	4	3	5	2	5	5	4	4	4	4	2	4	3	1
Poland	1	1	4	20	1	.	.	.	.	4	1	1	1	2	1	1	1	1	1	1	1	1	1	1	3	1	1	4	2	5	1	3	3	3	3	1	1	1	1
Poland	1	2	1	24	2	5	.	5	.	5	5	5	5	4	5	5	5	4	.	.	.	5	5	3	4	5	5	5	2	5	5	5	5	5	5	5	5	4	2
Poland	1	2	4	24	1	5	3	5	3	4	4	3	4	3	4	4	4	4	4	4	2	4	3	3	4	3	4	4	4	4	4	5	5	4	5	3	3	3	1
Poland	1	2	2	22	2	4	2	3	3	4	3	3	4	1	3	3	3	3	4	3	3	3	3	3	4	5	3	5	4	5	5	5	4	4	4	4	1	1	1
Poland	1	1	3	21	2	.	.	.	.	4	4	4	4	4	3	3	3	4	4	3	3	4	3	2	4	2	4	5	5	5	5	4	4	4	4	4	6	3	1
Poland	1	2	3	25	2	4	.	4	.	4	4	4	4	4	4	5	4	4	3	3	4	3	3	3	4	4	4	5	4	5	5	4	4	5	4	4	4	4	1
Poland	1	1	3	20	2	4	5	.	.	4	4	5	5	3	3	5	.	4	.	3	4	.	.	2	2	2	4	5	5	5	5	4	4	4	4	4	4	3	1
Poland	1	2	3	25	1	2	.	.	.	2	3	3	4	4	3	4	.	4	2	3	4	3	.	4	5	3	4	5	5	5	5	5	5	5	5	5	6	4	2
Poland	1	1	3	20	2	5	.	5	.	4	4	4	4	4	4	4	4	4	4	.	.	4	.	3	4	2	4	5	4	5	5	4	5	4	5	2	4	3	1
Poland	1	2	3	23	2	4	.	3	.	5	5	2	5	5	5	4	3	4	3	.	.	.	.	4	4	4	4	5	4	5	2	5	3	4	5	2	4	2	1
Poland	1	2	3	24	2	3	.	3	.	3	2	4	4	2	4	3	.	4	4	4	.	.	.	.	4	4	4	5	5	5	5	5	4	4	4	4	6	3	2
Poland	1	3	3	27	2	3	3	3	3	2	2	2	1	2	3	1	.	1	3	1	.	1	1	2	3	1	1	5	3	5	5	5	4	4	5	2	6	5	1
Poland	1	1	3	22	2	4	4	.	.	5	4	5	5	4	5	4	.	5	5	.	4	.	.	2	3	4	4	5	5	5	5	4	4	4	5	4	3	1	1
Poland	1	1	4	21	2	2	.	2	.	4	4	5	2	4	4	3	.	3	.	2	.	2	.	4	3	4	4	5	5	5	5	5	5	5	5	5	5	4	1
Poland	1	2	3	23	2	.	4	.	.	4	1	3	2	3	4	4	.	3	3	2	3	3	3	1	3	2	3	5	5	5	5	4	3	3	4	3	4	2	3
Poland	1	1	4	19	2	5	4	.	.	4	4	4	5	4	5	4	4	5	3	.	.	4	.	4	5	4	3	5	5	4	4	5	4	4	5	4	5	3	1
Poland	2	2	3	26	2	.	4	.	4	5	4	5	4	5	4	4	4	5	4	4	.	4	.	4	5	3	3	5	5	5	5	5	5	5	5	5	6	1	1
Poland	1	1	3	21	2	5	5	4	4	4	4	4	4	4	5	4	4	4	3	3	2	4	3	3	4	4	4	5	5	5	5	4	4	4	4	4	5	1	1
Poland	1	1	3	19	2	4	4	5	3	4	3	4	5	3	5	4	4	4	2	3	.	4	.	2	4	4	.	5	5	5	5	4	5	4	5	4	5	1	1
Poland	1	1	3	20	2	3	3	3	3	4	4	4	4	4	4	4	4	4	4	4	3	4	3	3	4	3	3	5	5	5	5	4	4	4	4	4	4	1	2
Poland	1	2	4	24	2	2	.	.	.	5	4	4	.	4	3	2	.	4	4	4	5	.	4	.	3	2	3	5	5	5	5	5	4	5	5	5	4	1	2
Poland	1	3	3	23	2	2	.	.	.	3	3	2	1	1	2	1	1	1	4	3	3	3	3	3	4	1	1	5	3	5	5	5	5	5	5	5	6	2	1
Poland	1	2	3	22	1	5	.	5	3	4	3	4	4	5	4	4	3	4	3	3	5	5	3	2	3	4	4	5	5	5	5	5	5	5	5	5	3	2	1
Poland	1	2	3	21	2	5	5	5	5	3	1	5	3	2	2	2	.	3	3	3	4	3	3	5	4	2	.	5	4	5	5	5	4	4	5	3	4	2	1
Poland	1	1	3	20	2	4	4	.	.	5	5	5	5	4	4	4	.	5	.	.	4	5	5	3	4	3	4	5	5	5	5	5	5	5	5	5	6	2	1
Poland	1	1	3	20	2	5	5	.	2	5	2	4	4	4	5	4	.	5	4	4	.	5	.	2	3	1	2	5	5	5	5	5	5	5	5	5	5	4	1
Poland	1	2	4	24	1	4	4	3	1	2	1	3	4	2	4	3	.	2	3	3	4	1	2	1	2	1	2	5	4	5	4	4	3	4	4	4	3	1	1
Poland	1	1	3	22	2	5	4	5	4	4	3	4	4	4	5	5	.	5	4	.	4	4	.	4	5	5	4	5	5	5	5	4	4	5	5	4	2	1	1
Poland	1	2	3	23	2	4	4	4	4	4	3	2	3	3	3	2	.	4	3	3	3	3	3	3	4	1	3	5	5	5	5	4	3	4	5	3	1	1	1
Poland	1	2	3	23	2	4	3	4	3	4	4	4	4	4	4	4	4	4	3	3	4	3	4	3	4	4	4	5	5	5	5	4	4	4	4	4	2	2	1
Poland	1	1	3	35	1	4	4	4	4	5	4	5	5	4	4	4	4	4	4	4	3	4	3	3	4	4	4	5	5	5	5	5	5	4	5	5	6	5	1
Poland	1	1	3	21	2	3	3	.	.	4	3	3	4	1	4	3	2	4	.	.	2	4	3	3	1	2	2	5	4	5	4	2	2	2	3	1	.	.	.
Poland	1	2	3	23	2	3	.	2	.	2	4	3	4	3	4	2	.	5	4	.	.	.	.	3	3	2	3	5	5	1	2	5	4	3	5	3	3	1	1
Poland	1	.	3	24	2	5	.	5	.	.	.	.	4	4	4	4	.	.	.	.	.	.	.	3	2	4	4	5	5	5	5	5	5	5	5	5	3	1	1
Poland	1	1	3	19	2	.	5	.	4	4	3	5	4	2	3	2	3	4	3	3	2	3	2	4	4	1	1	5	4	5	5	4	3	5	5	5	4	4	1
Poland	2	1	1	22	2	.	1	2	.	2	3	4	1	1	3	1	2	3	3	4	4	3	5	1	2	1	4	5	5	5	5	3	2	4	4	4	1	1	2
Poland	1	1	3	20	2	3	3	3	3	4	4	3	5	5	4	4	3	3	3	3	3	4	3	3	4	2	3	5	5	5	5	5	3	5	5	4	6	4	1
Poland	1	1	4	21	2	.	.	.	.	3	3	4	3	4	2	2	2	3	3	.	3	.	3	1	3	3	2	5	5	5	5	4	4	5	5	5	1	1	2
Poland	1	1	3	23	1	5	5	5	5	3	3	5	5	1	5	4	5	5	5	3	.	.	.	4	5	4	4	5	4	4	4	5	5	5	5	5	2	1	1
Poland	1	1	3	22	2	1	1	1	1	2	2	4	4	5	4	1	5	2	.	4	.	5	.	2	4	4	2	5	5	3	5	4	4	2	5	4	4	1	2
Poland	1	1	3	22	2	.	4	4	.	3	4	4	4	4	4	4	.	4	3	.	.	4	.	3	3	3	3	5	5	5	5	5	5	4	5	5	2	1	1
Poland	1	2	3	24	2	4	4	.	.	5	2	2	3	3	4	3	5	2	4	.	3	4	2	2	2	5	5	5	5	5	5	4	4	5	5	5	5	1	1
Poland	1	1	3	20	1	5	5	4	.	5	1	2	3	4	5	5	.	4	5	.	.	4	.	4	5	4	2	5	5	5	5	4	2	4	5	4	2	1	1
Poland	1	2	3	24	2	3	.	.	.	3	2	4	5	4	3	4	.	4	4	.	.	4	.	3	4	3	.	5	5	5	5	4	4	5	5	4	5	4	1
Poland	1	1	3	.	1	2	2	2	2	2	4	4	4	3	2	2	2	3	2	3	3	3	4	2	2	3	4	5	4	5	5	4	4	3	4	4	2	1	1
Poland	1	1	3	22	1	4	3	.	.	4	3	2	4	3	3	3	.	4	4	.	4	.	3	2	4	3	3	5	5	5	5	5	4	4	4	4	2	2	1
Poland	1	1	3	21	2	2	2	.	.	4	4	3	5	5	5	3	4	3	4	.	.	3	4	3	4	4	3	5	5	5	5	5	4	5	5	5	4	2	2
Poland	1	2	3	21	1	2	1	.	.	5	4	4	5	2	1	2	.	4	3	3	.	5	.	1	1	2	1	5	5	5	5	4	4	4	4	4	5	3	1
Poland	1	1	3	21	2	.	2	.	2	5	4	5	4	4	3	3	.	4	.	.	.	.	.	2	4	2	2	5	5	5	5	5	5	4	4	4	4	4	1
Poland	1	2	4	.	1	4	3	5	4	4	4	4	5	2	4	5	3	4	4	5	4	4	4	4	5	4	4	5	5	5	3	5	5	5	5	5	6	4	2
Poland	1	1	4	20	2	5	.	.	.	5	4	.	1	4	4	2	.	2	2	4	3	5	4	2	1	2	2	5	4	4	5	5	5	4	5	2	3	2	1
Poland	1	2	3	24	1	5	.	.	.	4	4	4	4	2	4	5	4	4	2	1	4	.	.	5	5	5	5	5	5	5	5	5	5	5	5	5	5	4	2
Poland	1	1	3	24	1	.	.	.	.	4	4	4	4	5	3	2	3	3	3	3	4	3	3	3	4	4	3	5	5	5	5	5	5	5	5	5	3	4	1
Poland	1	3	3	26	2	.	.	.	.	2	2	5	5	1	4	4	2	5	4	1	2	5	1	3	5	5	2	5	5	5	5	5	5	5	5	5	4	4	1
Poland	1	2	3	21	1	5	.	3	.	4	2	5	1	2	2	2	.	4	4	3	3	4	3	4	4	3	4	5	5	5	5	3	3	5	4	3	1	1	1
Poland	1	1	3	20	2	3	2	3	3	4	3	4	5	3	4	5	3	4	4	4	3	4	3	4	4	4	4	5	4	4	5	4	4	4	4	3	6	3	3
Poland	1	2	3	25	1	4	.	.	.	4	4	5	4	2	5	4	.	4	3	4	4	4	.	5	4	3	4	5	5	5	5	5	5	5	5	5	5	4	2
Poland	1	2	2	24	2	2	2	2	2	4	4	4	4	4	2	2	3	3	4	3	1	1	.	.	2	2	4	5	5	5	5	4	4	4	4	4	5	4	2
Poland	1	2	4	19	2	4	.	4	.	4	4	5	5	2	4	4	.	3	.	.	3	.	.	2	3	4	4	5	5	5	5	5	4	4	5	4	4	3	1
Poland	1	1	3	19	2	4	.	.	.	3	3	3	3	2	4	3	.	3	.	.	.	.	.	3	3	3	3	5	5	5	5	5	5	5	5	4	.	.	.
Poland	1	3	3	19	1	5	5	5	5	5	5	5	5	.	5	5	5	5	5	5	5	5	5	3	3	3	3	5	5	5	5	5	5	5	5	5	5	5	1
Poland	1	1	3	20	2	5	3	2	.	4	3	5	4	3	4	2	.	4	3	4	.	4	.	2	4	1	4	5	5	5	5	4	3	4	4	4	4	2	1
Poland	1	1	3	20	4	5	.	5	.	4	5	4	3	4	4	3	2	2	.	4	.	2	.	1	4	2	3	5	5	5	5	5	5	5	5	5	5	1	2
Poland	1	3	3	33	2	.	.	.	.	2	3	2	4	2	2	2	3	3	2	2	.	.	.	2	2	3	2	4	4	1	1	3	3	3	4	3	3	3	3
Poland	1	2	3	21	2	3	.	4	.	5	4	4	2	4	4	4	.	4	3	3	.	.	.	3	4	3	2	5	4	5	5	4	4	4	4	3	3	1	1
Poland	1	1	3	21	1	4	3	.	3	4	5	4	5	4	3	3	3	5	4	4	4	4	4	5	4	4	4	5	4	4	5	4	4	5	5	4	3	1	1
Poland	1	2	3	18	1	4	4	4	4	3	3	3	4	3	4	3	4	4	3	3	4	4	3	3	3	3	3	5	5	3	4	4	4	4	4	4	1	1	1
Poland	1	2	4	20	1	.	4	.	.	5	2	4	5	4	3	4	.	4	3	3	3	4	3	1	2	4	4	5	5	5	5	5	5	4	5	4	6	1	1
Poland	1	1	3	20	2	3	.	.	.	5	4	4	4	4	5	2	.	3	4	4	.	.	.	1	3	2	2	5	4	5	5	5	5	4	5	4	3	3	1
Poland	1	1	3	19	1	4	3	4	3	2	2	5	4	4	5	4	3	5	.	5	4	5	4	4	5	1	1	5	5	5	5	5	4	4	5	4	2	3	1
Poland	1	1	4	19	2	3	1	3	1	3	3	3	3	3	5	4	3	4	3	3	4	5	4	3	4	3	4	5	4	5	4	4	3	4	4	2	4	3	1
Poland	1	2	3	24	1	3	.	3	.	2	4	3	4	4	4	3	.	4	.	3	.	4	4	2	4	1	3	5	5	5	5	5	5	5	5	5	4	2	1
Poland	1	1	3	21	2	.	5	.	.	5	4	4	2	2	4	4	.	3	.	2	.	.	.	1	2	2	4	5	4	5	5	5	4	2	5	4	6	2	1
Poland	1	3	2	26	2	2	.	2	.	3	2	2	2	3	3	4	5	3	4	3	4	3	.	2	4	2	1	5	5	5	5	5	5	3	5	4	4	3	2
Poland	1	3	2	24	1	.	.	.	.	2	2	4	3	4	3	4	4	4	4	.	2	.	.	3	4	4	4	5	4	4	4	4	4	4	4	4	2	2	1
Poland	1	1	3	24	2	3	4	3	4	4	3	2	4	1	4	2	2	3	3	3	4	4	3	2	4	3	2	5	3	5	5	5	5	4	5	5	4	4	2
Poland	1	1	2	22	2	3	2	3	.	4	2	3	4	1	3	4	.	4	4	3	4	.	.	3	3	4	3	4	.	5	5	5	5	3	5	3	6	4	1
Poland	1	1	3	20	2	3	4	.	.	2	1	2	3	3	2	2	2	4	4	.	4	.	.	2	2	5	3	5	4	5	5	5	3	4	4	4	4	3	1
Poland	1	1	3	22	2	2	2	1	2	3	1	2	2	1	1	1	1	2	1	3	5	3	3	2	4	2	2	5	3	4	1	3	2	2	4	2	1	2	2
Poland	1	1	4	20	2	.	.	.	.	4	4	2	1	2	2	1	.	2	1	1	5	2	1	1	2	1	2	3	3	4	3	4	3	3	4	1	6	1	2
Poland	1	1	3	19	2	4	4	.	.	5	4	4	4	3	4	3	4	4	4	4	4	4	4	3	3	3	3	5	5	5	5	4	5	5	5	5	5	1	1
Poland	1	2	3	23	1	1	1	1	1	1	2	2	1	1	1	1	1	2	3	3	3	3	3	1	2	4	4	5	4	4	4	3	4	3	4	4	6	1	2
Poland	1	1	4	20	2	3	3	3	3	3	1	3	3	1	3	3	3	2	3	3	2	4	4	3	3	2	2	4	4	5	5	3	3	3	4	4	2	3	1
Poland	1	1	3	23	2	.	.	.	.	5	2	4	4	4	3	3	.	3	2	3	4	3	3	3	4	2	3	5	4	5	5	5	3	5	5	5	1	4	2
Poland	1	2	3	24	2	2	2	2	2	2	2	2	2	2	1	1	1	3	2	2	2	2	2	3	2	2	2	5	4	4	4	3	3	3	3	3	4	1	1
Poland	1	1	3	22	2	4	4	5	5	5	5	5	5	5	5	5	5	5	5	5	5	5	5	5	5	5	5	4	3	3	3	5	5	5	5	5	4	3	4
Poland	1	2	2	23	2	.	.	.	.	4	2	2	3	3	2	2	2	3	.	.	1	.	.	1	3	.	3	5	5	5	5	4	4	4	4	4	6	2	1
Poland	1	2	2	24	2	.	.	.	.	4	2	4	1	3	3	1	2	3	5	4	2	3	.	1	1	3	3	5	5	5	5	4	4	4	4	4	6	4	1
Poland	1	2	2	27	2	.	.	.	.	2	3	4	4	5	4	2	2	3	4	3	3	3	3	2	3	4	3	5	4	5	4	4	4	4	4	4	4	3	2
Poland	1	2	2	23	2	4	4	4	4	4	4	4	4	4	4	4	4	4	4	3	3	3	3	3	4	4	2	5	3	5	5	4	4	4	4	2	1	2	1
Poland	1	2	2	23	2	.	.	.	.	4	4	4	4	4	4	4	4	4	4	4	4	4	4	4	4	4	4	3	4	4	3	4	4	4	4	4	6	4	5
Poland	1	1	2	24	2	4	4	4	4	4	4	4	4	4	4	4	4	3	3	3	3	3	3	3	3	3	3	4	3	.	3	3	3	3	3	3	5	4	5
Poland	1	2	2	23	2	4	4	4	4	3	3	4	4	4	3	4	4	4	3	4	1	3	3	3	4	3	3	4	4	1	1	3	3	2	3	3	2	1	.
Poland	1	2	2	24	1	2	2	3	3	4	4	4	4	4	3	3	3	4	2	3	3	3	3	2	3	3	4	5	5	5	5	4	2	2	4	2	4	4	1
Poland	1	2	2	24	2	4	4	4	3	4	4	5	5	4	3	4	4	4	4	3	3	4	3	3	3	3	4	5	5	5	5	3	4	3	4	4	6	4	2
Poland	1	2	2	22	2	.	.	.	.	5	5	5	3	4	3	3	3	4	3	3	3	4	3	3	3	4	3	5	5	4	4	5	4	5	5	4	4	3	1
Poland	1	1	2	23	2	3	4	3	4	2	3	3	4	4	4	4	3	3	3	3	3	3	4	5	3	3	3	5	5	3	1	3	2	3	3	3	6	3	4
Poland	1	2	2	24	2	4	4	.	4	4	4	4	4	4	4	4	.	4	4	4	3	.	3	3	4	3	.	5	4	4	4	4	4	4	4	4	4	3	1
Poland	1	2	2	24	2	1	1	2	2	2	2	2	2	2	1	1	2	2	2	2	2	2	2	2	3	1	2	1	1	2	3	2	2	2	2	2	5	3	3
Poland	1	2	2	23	2	.	.	.	.	3	2	4	2	1	3	4	.	3	.	.	.	.	.	2	3	4	3	5	3	5	5	4	3	4	4	3	6	4	1
Poland	1	1	2	23	2	2	3	3	5	.	4	4	4	5	3	5	3	3	.	.	3	4	4	3	3	3	3	5	5	4	4	4	4	4	4	4	4	4	4
Poland	1	2	2	24	2	.	.	1	1	4	1	3	2	2	2	4	2	2	1	5	3	.	3	2	2	2	2	5	5	5	5	4	4	4	4	4	4	3	1
Poland	1	2	2	23	2	.	.	.	.	5	5	5	4	.	1	5	.	3	5	5	.	4	4	1	4	1	2	5	5	5	5	5	5	4	4	5	1	1	1
Poland	1	2	2	23	2	.	3	3	3	5	5	3	4	4	5	3	3	3	5	3	5	3	5	3	3	3	3	5	5	5	2	3	3	3	3	3	1	5	1
Poland	1	2	2	24	2	3	2	3	3	3	3	3	3	3	4	2	3	3	3	3	3	3	3	3	3	3	3	5	4	3	3	3	4	4	4	4	1	2	1
Poland	1	2	2	24	2	3	3	3	3	3	.	4	3	3	4	3	3	4	3	3	2	3	3	3	3	3	3	4	3	4	3	3	3	3	3	3	1	4	1
Poland	1	2	2	23	2	.	.	.	.	4	3	3	4	4	4	3	4	3	4	4	3	3	3	2	4	4	3	5	5	5	5	5	4	4	5	5	2	2	1
Poland	1	2	2	23	2	1	1	1	1	4	4	5	4	4	1	2	.	2	.	.	3	.	.	3	1	4	3	5	5	5	5	5	5	5	5	5	2	2	1
Poland	1	1	2	24	2	3	4	4	3	5	5	5	4	5	5	4	5	4	4	5	4	4	4	4	4	5	4	5	5	5	5	4	4	4	3	4	4	5	5
Poland	1	2	1	23	2	.	.	.	.	5	5	5	5	5	4	4	4	5	5	.	.	.	.	3	4	4	3	5	5	5	5	4	2	4	4	4	2	4	1
Poland	1	2	2	22	2	3	3	3	3	2	3	4	4	3	2	3	3	3	3	3	3	4	3	2	3	3	3	5	5	5	5	5	5	5	5	5	5	4	3
Poland	1	2	2	23	2	3	4	3	3	5	5	5	5	.	4	4	3	3	2	1	1	3	1	3	4	4	4	5	5	5	5	4	4	4	4	4	5	2	1
Poland	1	1	4	19	2	4	2	4	2	5	3	4	5	4	4	3	.	4	1	.	5	.	.	2	3	5	3	5	5	5	5	5	5	4	5	5	4	1	1
Poland	1	3	2	45	1	.	.	.	.	4	3	4	4	4	4	3	3	4	4	.	4	5	.	4	5	4	3	5	5	5	5	4	4	4	4	4	3	3	2
Poland	1	1	3	23	2	.	.	.	.	4	4	3	5	4	4	4	.	4	.	.	5	5	.	2	5	4	4	5	5	5	5	5	4	3	5	5	4	5	1
Poland	1	1	3	21	2	5	5	4	4	4	4	4	4	4	4	4	4	4	4	4	4	4	4	4	4	4	.	5	5	5	5	4	4	4	4	4	1	1	4
Poland	1	1	3	20	2	.	.	3	.	4	3	4	4	1	3	4	3	5	2	.	3	.	.	3	3	5	4	5	4	5	5	5	4	4	5	5	4	4	1
Poland	1	2	3	23	2	3	3	3	3	5	4	5	4	5	4	3	4	4	4	.	.	4	.	2	3	2	2	5	5	4	5	4	4	4	4	4	6	2	1
Poland	2	1	2	23	2	4	3	.	.	4	4	4	4	4	4	4	4	4	3	3	3	3	3	2	3	4	2	4	4	4	4	5	4	4	4	4	3	3	1
Poland	1	1	3	22	2	3	2	3	2	4	3	4	3	2	2	1	3	3	3	4	4	3	3	1	2	1	3	4	4	5	5	5	5	5	5	5	4	4	2
Poland	1	1	3	21	2	.	.	.	.	4	2	.	4	4	2	2	2	3	3	3	2	3	3	2	3	3	3	4	4	4	4	4	4	4	4	3	3	3	1
Poland	2	1	2	22	2	1	1	2	2	2	2	2	2	2	.	3	.	2	2	2	3	3	3	4	4	3	4	5	2	5	5	5	5	5	5	5	4	1	1
Poland	1	1	2	24	2	.	.	.	.	4	4	4	4	4	4	4	.	3	3	3	3	.	3	2	2	3	2	5	5	5	5	4	4	4	4	3	4	4	1
Poland	1	1	3	24	2	1	1	.	.	4	3	4	5	4	4	4	.	4	5	3	3	3	3	2	4	3	3	5	5	5	5	5	5	5	5	5	6	4	1
Poland	1	2	3	21	2	4	4	2	2	5	3	4	3	3	2	2	.	1	3	1	3	3	2	3	4	3	3	5	5	5	5	4	3	4	4	4	6	5	1
Poland	1	2	3	27	1	.	.	.	.	4	2	5	5	4	4	3	4	5	5	4	1	5	.	4	4	5	4	5	5	5	5	5	5	5	5	5	4	4	2
Poland	1	1	1	20	2	.	.	.	.	4	2	2	3	3	3	3	4	3	2	3	.	.	.	3	2	2	2	5	3	5	5	4	4	4	4	3	6	3	2
Poland	1	2	4	23	2	.	.	.	.	5	2	4	3	4	3	3	3	3	.	.	.	.	.	2	2	2	3	4	3	4	4	4	3	4	4	3	4	3	1
Poland	1	2	2	24	2	.	2	3	3	1	2	1	1	1	2	1	1	2	.	.	3	4	1	3	4	1	4	4	5	4	4	4	4	4	4	4	.	.	.
Poland	1	1	4	20	2	2	2	2	2	3	3	.	4	4	3	2	3	2	4	4	2	.	4	3	2	2	3	5	5	5	5	5	5	5	5	4	4	3	1
Poland	1	2	2	25	2	.	4	.	.	1	1	.	3	1	2	2	3	3	.	.	.	.	.	3	2	2	2	5	5	5	5	4	2	4	5	4	2	1	1
Poland	1	2	1	20	2	3	3	3	3	5	5	5	5	5	5	5	3	5	3	3	4	3	4	3	4	4	4	5	4	5	5	5	5	3	4	3	6	4	2
Poland	1	2	3	27	2	.	.	.	.	4	3	5	4	4	4	5	4	5	5	.	.	5	.	3	3	3	4	5	5	1	5	4	4	4	4	4	6	4	1
Poland	1	2	2	24	2	5	5	.	.	5	5	5	5	5	5	5	.	5	5	5	2	5	5	2	4	5	5	5	5	5	5	5	5	5	5	5	4	3	1
Poland	1	2	2	23	2	3	4	3	4	3	4	4	3	3	3	3	3	4	3	2	1	4	3	4	3	2	4	5	3	1	1	3	3	4	4	3	5	4	1
Poland	1	1	1	22	2	.	.	.	.	4	4	4	3	4	4	4	4	3	.	.	3	.	.	3	2	3	3	5	5	5	5	5	4	4	5	4	5	4	1
Poland	1	2	2	22	2	.	.	.	.	3	2	4	4	2	2	3	4	2	1	3	2	3	2	2	2	3	2	5	2	5	2	5	4	5	5	2	5	4	1
Poland	1	1	1	21	2	.	4	1	1	4	2	4	2	1	1	3	.	1	1	.	.	1	3	1	2	4	1	5	2	5	1	5	5	5	5	5	5	3	1
Poland	1	1	4	20	2	1	.	1	.	5	2	4	3	1	4	1	.	3	4	3	.	1	.	1	2	1	1	5	5	5	5	5	5	5	5	3	6	2	1
Poland	1	2	3	30	1	3	.	1	1	5	1	1	1	5	3	2	1	2	.	1	.	.	.	4	5	5	5	5	5	5	5	5	5	5	5	5	1	5	1
Poland	2	1	1	21	1	1	1	1	1	4	4	5	4	1	5	5	4	5	1	1	2	2	2	3	2	1	2	3	2	2	2	5	5	1	5	1	1	1	1
Poland	2	1	2	23	2	2	2	4	4	5	3	2	4	1	2	2	2	2	2	2	2	3	3	3	2	3	2	4	3	3	3	4	4	4	4	3	1	1	1
Poland	1	2	3	23	2	5	5	5	5	5	4	5	4	3	5	5	5	5	4	5	5	5	5	3	4	4	4	5	5	5	5	4	5	5	5	5	4	4	2
Poland	1	2	1	24	1	5	.	5	.	5	4	5	5	4	4	4	4	5	.	.	.	.	.	4	5	5	5	5	5	5	5	5	5	5	5	5	6	3	1
Poland	1	2	2	25	2	3	3	3	3	3	3	3	3	3	3	2	3	3	3	3	2	3	3	3	3	3	3	5	5	5	5	3	3	3	3	3	1	1	1
Poland	1	1	3	22	1	5	.	5	.	2	4	3	3	4	4	5	.	4	.	.	1	.	.	4	5	3	.	5	5	5	5	5	5	5	5	5	5	4	2
Poland	1	1	1	23	1	.	.	.	.	5	4	4	4	3	4	4	3	5	4	5	.	4	5	3	5	3	4	5	5	5	5	5	4	5	5	4	6	5	5
Poland	2	1	3	22	1	1	1	2	2	2	2	3	2	2	2	2	.	2	2	3	3	3	3	2	2	2	1	5	2	3	3	3	3	4	4	2	4	1	2
Poland	2	2	4	24	2	.	.	.	.	.	.	4	4	4	4	2	.	.	4	4	.	3	4	5	2	3	4	5	3	5	4	4	2	4	3	4	2	1	1
Poland	1	1	3	28	1	3	3	3	3	3	3	3	3	3	3	3	3	3	3	3	3	3	3	4	3	4	3	4	5	4	3	2	2	4	4	2	4	1	4
Poland	1	1	1	27	2	.	.	.	.	4	5	5	5	5	4	5	5	5	3	.	3	3	.	1	4	2	1	4	3	5	5	1	1	2	1	2	6	4	1
Poland	1	2	1	22	2	.	.	.	.	4	4	4	4	2	2	3	3	3	3	3	.	2	.	2	2	2	2	5	3	5	2	5	5	4	5	4	3	3	1
Poland	1	2	4	19	1	.	.	.	.	3	3	2	2	2	1	1	3	1	2	1	.	1	1	2	3	2	2	5	4	5	5	5	5	5	5	5	4	5	3
Poland	1	1	1	22	2	.	4	.	4	5	4	3	4	4	3	3	3	4	.	.	.	4	.	2	4	3	4	5	5	5	5	5	4	4	5	4	4	4	1
Poland	1	2	3	23	2	.	3	.	3	5	4	4	4	4	4	3	3	3	3	3	2	3	3	4	4	4	5	5	3	4	5	4	3	4	5	4	6	2	1
Poland	1	1	3	25	2	2	3	2	3	4	3	4	4	5	2	2	2	2	3	3	2	2	2	3	3	3	3	4	4	2	1	4	4	4	4	4	1	1	1
Poland	1	2	1	24	2	.	.	5	.	3	3	3	3	4	3	4	5	3	2	2	1	3	3	2	3	2	2	5	3	5	3	2	3	2	4	2	2	1	1
Poland	1	1	3	21	2	.	.	.	.	3	4	5	3	5	3	2	3	3	3	4	2	4	3	3	4	4	3	4	3	4	3	3	4	4	4	3	2	3	2
Poland	1	2	1	24	1	1	4	4	4	4	3	4	5	5	3	5	3	3	3	.	.	4	5	4	4	.	3	5	5	5	5	4	5	5	5	5	4	2	1
Poland	1	1	3	22	2	3	3	2	2	3	3	3	4	2	4	2	2	3	3	3	4	.	4	3	3	4	3	5	5	5	5	4	4	4	4	3	4	2	2
Poland	1	1	3	20	2	4	4	3	3	4	4	4	4	5	5	4	4	4	5	4	4	4	4	3	5	4	4	5	3	5	3	4	4	4	4	4	6	2	1
Poland	1	2	3	24	1	.	.	.	.	.	4	5	5	3	5	4	.	4	3	3	4	.	.	3	4	3	4	5	5	5	5	5	4	4	4	4	4	3	1
Poland	1	2	1	25	2	1	3	4	4	4	4	4	4	2	4	4	1	4	3	3	3	3	3	5	4	3	3	5	4	5	5	4	4	3	5	4	3	2	1
Poland	1	2	2	23	1	4	5	3	.	4	4	4	4	4	3	3	3	4	3	3	4	4	4	3	3	3	3	5	5	5	5	4	4	4	4	4	3	3	2
Poland	1	1	4	21	1	2	.	2	.	4	3	.	3	3	1	2	3	3	2	3	.	3	.	2	2	3	1	5	5	5	5	5	5	5	5	5	6	4	1
Poland	1	1	4	22	2	3	3	2	2	2	4	3	4	3	3	3	3	3	2	3	.	2	3	3	3	2	2	5	4	5	5	5	4	4	5	4	1	1	1
Poland	1	2	3	22	2	4	.	.	.	4	3	4	2	4	4	3	3	3	2	2	.	4	3	4	3	5	4	5	5	5	3	4	4	4	5	4	6	4	1
Poland	1	1	1	21	2	4	5	3	3	3	2	2	2	3	4	3	3	2	2	3	.	4	.	3	4	4	3	5	4	5	5	4	3	3	5	3	6	4	1
Poland	1	1	3	20	2	3	4	3	.	2	2	2	4	2	3	2	.	2	3	3	5	.	4	4	4	1	3	4	4	5	5	3	4	4	4	4	2	1	2
Poland	1	1	1	22	2	.	.	.	.	3	3	3	3	4	.	4	.	4	2	4	.	3	.	1	2	2	4	5	5	4	5	5	5	4	5	4	6	4	2
Poland	1	1	3	21	2	4	3	4	4	3	3	3	2	1	4	2	.	3	3	3	3	3	3	1	3	3	2	3	4	5	4	4	4	4	4	4	1	1	1
Poland	1	1	3	24	2	2	2	.	.	4	2	3	4	3	2	2	2	2	2	2	2	2	2	3	3	3	2	4	2	4	2	4	4	4	4	4	5	2	1
Poland	1	2	4	23	2	5	4	4	5	3	4	4	4	4	3	4	4	4	3	4	4	3	4	5	4	4	4	4	4	5	3	4	4	4	4	3	1	1	1
Poland	1	1	4	21	2	.	.	.	.	5	5	5	4	4	4	2	.	4	.	.	2	.	3	4	2	2	2	5	4	5	3	2	4	4	4	2	5	2	1
Poland	1	1	1	19	1	.	.	.	.	4	3	4	4	4	3	4	3	4	3	3	3	4	3	2	4	2	3	5	4	5	5	3	4	4	4	4	1	4	1
Poland	1	1	3	20	2	.	.	.	.	4	2	3	5	3	3	4	.	3	.	.	.	.	.	3	4	3	3	5	5	5	5	5	4	4	4	4	4	1	1
Poland	1	2	1	23	2	.	.	.	.	4	2	2	3	1	2	.	.	3	.	.	3	.	.	2	4	3	3	5	5	5	5	4	4	4	4	4	5	4	1
Poland	1	1	1	21	2	3	4	4	4	4	4	4	5	4	.	4	3	2	4	3	.	4	3	4	4	3	3	5	5	4	3	4	4	4	5	5	4	3	3
Poland	1	1	3	24	2	.	.	.	.	4	4	3	2	3	2	2	.	2	4	.	.	.	.	2	4	4	4	5	5	4	5	5	4	5	5	4	.	.	.
Poland	1	1	3	21	2	4	.	4	.	3	2	3	2	1	2	3	2	3	3	.	.	.	.	2	2	2	2	5	5	5	3	4	3	2	4	4	4	2	1
Poland	1	1	1	24	2	4	4	4	4	4	4	3	4	4	4	4	4	4	4	3	4	4	5	2	3	3	3	5	5	5	5	5	5	5	5	5	1	1	1
Poland	2	1	1	22	2	3	3	3	.	4	3	3	4	4	3	3	3	3	.	.	2	.	.	2	3	2	3	5	4	2	1	5	4	4	5	5	4	3	1
Poland	1	1	3	20	2	.	4	.	4	3	4	3	4	4	3	2	2	3	3	2	.	3	2	2	2	2	3	5	4	5	5	4	3	3	4	3	2	2	1
Poland	1	3	3	22	1	.	.	.	.	4	3	4	3	3	2	2	3	3	2	.	.	3	.	2	3	4	4	5	5	5	5	5	5	5	5	5	4	3	1
Poland	1	1	3	21	2	.	.	.	.	4	3	3	3	4	3	2	.	3	3	3	4	3	3	3	3	3	3	5	5	5	5	4	4	4	4	4	5	2	2
Poland	2	1	3	20	1	4	4	3	3	3	4	3	3	4	4	3	4	4	3	4	4	4	3	4	4	4	3	5	5	3	3	3	4	4	4	3	2	2	2
Poland	1	1	1	25	1	2	4	.	.	5	4	4	4	4	4	.	3	4	4	4	2	3	2	3	4	2	4	5	5	5	5	5	5	5	5	5	2	2	2
Poland	1	1	3	19	1	.	3	3	2	2	3	2	4	2	2	3	1	2	1	1	4	3	3	1	2	1	2	5	3	4	5	4	4	4	4	2	5	1	1
Poland	1	2	2	23	2	4	.	4	.	4	2	5	5	4	2	.	3	3	.	.	.	.	.	2	4	2	4	5	4	4	2	4	4	4	4	2	2	3	1
Poland	1	1	3	21	2	.	.	4	.	3	3	.	.	2	3	4	3	3	3	.	.	.	.	3	3	2	3	5	5	5	5	5	5	4	5	5	4	2	1
Poland	1	1	2	19	2	3	4	4	3	5	4	4	5	5	3	4	3	3	4	4	3	5	5	3	3	2	4	5	5	2	2	4	3	5	5	5	5	3	2
Poland	1	2	4	20	2	3	3	.	.	3	3	3	4	4	2	3	2	2	2	3	1	.	.	3	3	3	2	3	2	3	2	4	3	3	3	3	4	3	1
Poland	1	1	4	21	2	.	.	.	.	4	4	4	4	4	4	4	.	4	4	.	4	4	.	3	4	4	.	5	5	5	5	4	4	4	4	4	4	4	2
[truncated: 8,093 more rows]

## Sheet: codebook
name	label	values
Q1	In which country do you study (in this semester)?
Q4	What is your student status?	1: "Full-time", 2: "Part-time"
Q5	What level of study you are enrolled in?	1: "Bachelor’s degree", 2: "Master’s degree", 3: "Doctoral degree"
Q6	Please indicate your main field of study.	1: "Arts", 2: "Social", 3: "Natural", 4: "Techincal"
Q7	How old are you (in years)? (Click and write )
Q8	What is your gender?	1: "Male", 2: "Female", 3: "Gender diverse", 4:"Prefer not to say"
Q10b	Online with a video recording (not in real-time)	1: "Very dissatisfied", 2: "Dissatisfied", 3: "Natural", 4: "Satisfied", 5: "Very satisfied"
Q10c	Online with an audio recording (not in real-time)	1: "Very dissatisfied", 2: "Dissatisfied", 3: "Natural", 4: "Satisfied", 5: "Very satisfied"
Q12b	Online with a video recording (not in real-time)	1: "Very dissatisfied", 2: "Dissatisfied", 3: "Natural", 4: "Satisfied", 5: "Very satisfied"
Q12c	Online with an audio recording (not in real-time)	1: "Very dissatisfied", 2: "Dissatisfied", 3: "Natural", 4: "Satisfied", 5: "Very satisfied"
Q16a	have provided course assignments (e.g. readings, homework, quizzes) on a regular basis.	1: "Strongly disagree", 2: "Disagree", 3: "Natural", 4: "Agree", 5: "Strongly agree"
Q16b	have provided feedback on my performance on given assignments.	1: "Strongly disagree", 2: "Disagree", 3: "Natural", 4: "Agree", 5: "Strongly agree"
Q16c	have responded to my questions in a timely manner.	1: "Strongly disagree", 2: "Disagree", 3: "Natural", 4: "Agree", 5: "Strongly agree"
Q16d	have been open to students’ suggestions and adjustments of online classes.	1: "Strongly disagree", 2: "Disagree", 3: "Natural", 4: "Agree", 5: "Strongly agree"
Q16e	have informed me on what exams will look like in this new situation.	1: "Strongly disagree", 2: "Disagree", 3: "Natural", 4: "Agree", 5: "Strongly agree"
Q18a	lectures.	1: "Very dissatisfied", 2: "Dissatisfied", 3: "Natural", 4: "Satisfied", 5: "Very satisfied"
Q18b	tutorials/seminars and practical classes.	1: "Very dissatisfied", 2: "Dissatisfied", 3: "Natural", 4: "Satisfied", 5: "Very satisfied"
Q18c	supervisions (mentorships).	1: "Very dissatisfied", 2: "Dissatisfied", 3: "Natural", 4: "Satisfied", 5: "Very satisfied"
Q19a	teaching staff.	1: "Very dissatisfied", 2: "Dissatisfied", 3: "Natural", 4: "Satisfied", 5: "Very satisfied"
Q19b	technical support or IT services.	1: "Very dissatisfied", 2: "Dissatisfied", 3: "Natural", 4: "Satisfied", 5: "Very satisfied"
Q19c	student affairs office.	1: "Very dissatisfied", 2: "Dissatisfied", 3: "Natural", 4: "Satisfied", 5: "Very satisfied"
Q19f	library.	1: "Very dissatisfied", 2: "Dissatisfied", 3: "Natural", 4: "Satisfied", 5: "Very satisfied"
Q19h	tutors.	1: "Very dissatisfied", 2: "Dissatisfied", 3: "Natural", 4: "Satisfied", 5: "Very satisfied"
Q19i	student counseling services.	1: "Very dissatisfied", 2: "Dissatisfied", 3: "Natural", 4: "Satisfied", 5: "Very satisfied"
Q20b	My performance as a student has improved since on-site classes were cancelled.	1: "Strongly disagree", 2: "Disagree", 3: "Natural", 4: "Agree", 5: "Strongly agree"
Q20d	I have adapted well to the new teaching and learning experience.	1: "Strongly disagree", 2: "Disagree", 3: "Natural", 4: "Agree", 5: "Strongly agree"
Q20e	I can master the skills taught in class this year even on-site classes were cancelled.	1: "Strongly disagree", 2: "Disagree", 3: "Natural", 4: "Agree", 5: "Strongly agree"
Q20f	I can figure out how to do the most difficult classwork since on-site classes were cancelled.	1: "Strongly disagree", 2: "Disagree", 3: "Natural", 4: "Agree", 5: "Strongly agree"
Q21c	A computer	1: "Never", 2: "Rarely", 3: "Sometimes", 4: "Often", 5: "Always"
Q21d	Required software and programmes	1: "Never", 2: "Rarely", 3: "Sometimes", 4: "Often", 5: "Always"
Q21f	Headphones and microphone	1: "Never", 2: "Rarely", 3: "Sometimes", 4: "Often", 5: "Always"
Q21g	Webcam	1: "Never", 2: "Rarely", 3: "Sometimes", 4: "Often", 5: "Always"
Q22a	browsing online information.	1: "Strongly disagree", 2: "Disagree", 3: "Natural", 4: "Agree", 5: "Strongly agree"
Q22b	sharing digital content.	1: "Strongly disagree", 2: "Disagree", 3: "Natural", 4: "Agree", 5: "Strongly agree"
Q22d	using online collaboration platforms (Zoom, MS Teams, Skype, etc.).	1: "Strongly disagree", 2: "Disagree", 3: "Natural", 4: "Agree", 5: "Strongly agree"
Q22e	using online communication platforms (e-mail, messaging, etc.).	1: "Strongly disagree", 2: "Disagree", 3: "Natural", 4: "Agree", 5: "Strongly agree"
Q22f	using software and programmes required for my studies.	1: "Strongly disagree", 2: "Disagree", 3: "Natural", 4: "Agree", 5: "Strongly agree"
Q23f	Colleague from my course	1: "Not at all", 2: "Two or three times a month", 3: "Once a week", 4: "Several times a week", 5: "Once a day", 6: "Several times a day"
Q23g	Lecturer	1: "Not at all", 2: "Two or three times a month", 3: "Once a week", 4: "Several times a week", 5: "Once a day", 6: "Several times a day"
Q23h	Administrative staff	1: "Not at all", 2: "Two or three times a month", 3: "Once a week", 4: "Several times a week", 5: "Once a day", 6: "Several times a day"
